1                   **CglB adhesins secreted at bacterial focal adhesions mediate gliding motility**

2  
3  
4  
5  
6  
7     Salim T. Islam<sup>1,2,3\*</sup>, Laetitia My<sup>3</sup>, Nicolas Y. Jolivet<sup>1,2</sup>, Akeisha M. Belgrave<sup>4,5</sup>, Betty Fleuchot<sup>3</sup>,  
8           Gael Brasseur<sup>3</sup>, Laura M. Faure<sup>3</sup>, Gaurav Sharma<sup>6,7</sup>, David J. Lemon<sup>8</sup>, Fares Saïdi<sup>1,2</sup>, Jean-  
9     Bernard Fiche<sup>9</sup>, Benjamin P. Bratton<sup>5</sup>, Mitchell Singer<sup>6</sup>, Anthony G. Garza<sup>8</sup>, Marcelo Nollmann<sup>9</sup>,  
10                                   Joshua W. Shaevitz<sup>5</sup>, Tâm Mignot<sup>3\*</sup>

11  
12     <sup>1</sup> Armand Frappier Health & Biotechnology Research Centre, Institut National de la Recherche  
13     Scientifique, Université du Québec, Institut Pasteur International Network, Laval, QC, H7V  
14     1B7, Canada

15     <sup>2</sup> PROTEO, the Quebec Network for Research on Protein Function, Engineering, and  
16     Applications, Université Laval, Quebec, QC, G1V 0A6, Canada

17     <sup>3</sup> Laboratoire de Chimie Bactérienne, CNRS - Université Aix-Marseille UMR7283, Institut de  
18     Microbiologie de la Méditerranée, Marseille, 13009, France

19     <sup>4</sup> Integrated Sciences Program, Harrisburg University of Science & Technology, Harrisburg, PA,  
20     17101, USA

21     <sup>5</sup> Lewis-Sigler Institute for Integrative Genomics, Princeton University, Princeton, NJ, 08540,  
22     USA

23     <sup>6</sup> Department of Microbiology and Molecular Genetics, University of California – Davis, Davis,  
24     CA, 95616, USA

25     <sup>7</sup> Institute of Bioinformatics and Applied Biotechnology, Electronic City, Bengaluru, Karnataka,  
26     560100, India

27     <sup>8</sup> Department of Biology, Syracuse University, Syracuse, NY, 13210, USA

28     <sup>9</sup> Centre de Biochimie Structurale, CNRS UMR5048, INSERM U1054, Montpellier, 34090,  
29     France

30  
31     \*co-corresponding authors

32  
33     Tâm Mignot

34     E-mail: [tmignot@imm.cnrs.fr](mailto:tmignot@imm.cnrs.fr)

35     Phone: (+33) 04 91 16 40 77 ext. 4506

Salim T. Islam

E-mail: [salim.islam@iaf.inrs.ca](mailto:salim.islam@iaf.inrs.ca)

Phone: (+1) 450-687-5010 ext. 8897

36 **ABSTRACT:**

37           The predatory deltaproteobacterium *Myxococcus xanthus* uses a helically-trafficked  
38 motor at bacterial focal adhesion (bFA) sites to power gliding motility. Using TIRF and force  
39 microscopy, we herein identify the integrin  $\alpha$ I-domain-like outer-membrane (OM) lipoprotein  
40 CglB as an essential substratum-coupling protein of the gliding motility complex. Similar to  
41 most known OM lipoproteins, CglB is anchored on the periplasmic side of the OM and thus a  
42 mechanism must exist to secrete it to the cell surface in order for it to interact with the  
43 underlying substratum. We reveal this process to be mediated by a predicted OM  $\beta$ -barrel  
44 structure of the gliding complex. This OM platform was found to regulate the conformational  
45 activation and secretion of CglB across the OM. These data suggest that the gliding complex  
46 promotes surface exposure of CglB at bFAs, thus explaining the manner by which forces exerted  
47 by inner-membrane motors are transduced across the cell envelope to the substratum; they also  
48 uncover a novel protein secretion mechanism, highlighting the ubiquitous connection between  
49 secretion and bacterial motility.

50

51

52

53 **Keywords:**

54 bacterial motility, integrins, protein secretion systems, molecular motor, cell-surface lipoprotein,  
55 protein folding, disulphide bonds, von Willebrand Factor A, TonB-dependent transporter, outer-  
56 membrane exchange

57 **INTRODUCTION:**

58 Directed surface motility of cells from all biological kingdoms involves highly-dynamic  
59 cell–substratum interactions. In eukaryotic cells, this process involves the engagement and  
60 activation of surface-exposed integrin(-like) adhesins, directionally transported by molecular  
61 motors (myosin) via integrin coupling to the internal cytoskeleton (actin)<sup>1</sup>. For metazoan  
62 organisms, nascent integrin adhesions to the extracellular matrix (ECM) lead to integrin  
63 nucleation and the formation of large eukaryotic focal adhesion (eFA) sites; these assemblies  
64 remain fixed-in-space relative to a translocating cell, promoting local traction, transduction of  
65 motor forces, and cell translocation<sup>2</sup>. Such surface motility is not restricted to eukaryotic cells.  
66 Long known to move on surfaces in the absence of outward appendages (such as flagella or type  
67 IV pili) via a process termed “gliding motility”<sup>3</sup>, individual cells of the Gram-negative predatory  
68 deltaproteobacterium *Myxococcus xanthus* were shown to utilize a trans-envelope multi-protein  
69 Agl–Gliding transducer (Glt) complex (**Fig. 1A**) to power gliding motility<sup>4,5</sup>. In motile cells,  
70 these complexes associate at the leading pole and move directionally in the bacterial inner  
71 membrane (IM) toward the lagging cell pole, following a right-handed helical trajectory<sup>6-8</sup> (**Fig.**  
72 **1A**). These rotational movements likely probe the substratum beneath gliding cells, leading to  
73 immobilization of the Agl–Glt complex at fixed bacterial focal adhesion (bFA) sites as well as  
74 cell translocation via left-handed rotation of the bacterium around its long axis<sup>8</sup> (**Fig. 1A**).

75 At the molecular scale, the mechanisms that promote force transmission and adhesion at  
76 bFAs are not known. The IM components of the motility complex assemble at the pole on a  
77 cytoplasmic scaffold formed by bacterial actin MreB, the Ras-like protein MglA and the coiled-  
78 coil AglZ protein<sup>9,10</sup>. The IM complex contains the molecular motor AglRQS, a  
79 TolQR/ExbBD/MotAB-like channel that uses the proton gradient formed across the bacterial IM  
80 to energize long-range movements of the IM complex in the bacterial envelope<sup>11</sup>. However, the  
81 manner in which these intracellular motions are coupled to the substratum in order to propel the  
82 cell is unknown. One hypothesis states that trafficking motor units deform the peptidoglycan  
83 meshwork in the periplasm, propagating surface wave deformations and viscous interactions  
84 between the outer membrane (OM) and the substratum (**Fig. 1A, panel i**). However,  
85 observations and mechanical modelling of cell–cell collision events suggest that interactions  
86 between a gliding cell and the substratum are elastic in nature, consistent with localized adhesion  
87 points and the existence of an anchored adhesin<sup>12</sup> (**Fig. 1A, panel i**). In the cell envelope, the IM

88 motor moves by establishing transient contacts with a complex of Glt proteins localized in the  
89 OM (herein called the OM platform, see below), linked via periplasmic domains of retractile  
90 proteins that traverse the peptidoglycan meshwork<sup>8</sup> (**Fig. 1A**). When in contact with the  
91 substratum, these motions tether the OM platform at bFAs, which is proposed to create local  
92 adhesions and movement of the cell (**Fig. 1A**). Consistent with localized adhesion at bFA sites,  
93 gliding cells abandoned patches of OM motility-complex proteins on the substratum at positions  
94 formerly occupied by bFA sites<sup>8</sup>. However, given that the OM platform is required for motor  
95 movements, it could not be assessed whether the OM platform is directly responsible for  
96 adhesion to the substratum<sup>3,8</sup> and thus, the manner of adhesion, a core aspect of the motility  
97 mechanism, remained unaddressed.

98 The proteins GltA, GltB, GltH, and GltK constitute the proposed OM platform (**Fig. 1A,**  
99 **panel ii**). While the exact structure of this platform is not known, GltA, GltB, and GltH are all  
100 localized in the OM and are predicted to form integral OM  $\beta$ -barrels<sup>3,4,8,13,14</sup> (**Fig. 1,**  
101 **Supplementary Fig. S1A-C**). GltA and GltB interact with each other, as well as with GltC  
102 present in the periplasmic leaflet of the OM<sup>13</sup> (the function of GltC is not addressed herein).  
103 GltK and GltH interactions have yet to be defined but data presented in our investigation suggest  
104 that these proteins are functionally associated with the OM platform. Herein, we also identify the  
105 OM lipoprotein CglB<sup>15</sup> as a main substratum-coupling adhesin of the Agl–Glt gliding motility  
106 apparatus associated with the OM platform. Specifically, the results support the presence of a  
107 protein assembly formed by GltA, B, H, and K that regulates CglB surface exposure, secreting it  
108 to the cell surface upon stimulation of the motility complex at bFAs.

109 **RESULTS:**

110 ***GltA, B, and H form a putative integral OM protein complex***

111 The Glt OM platform contains predicted OM-spanning  $\beta$ -barrel proteins (**Fig. 1,**  
112 **Supplementary Fig. S1A-C**) and thus is unlikely to mediate direct substratum-anchoring of the  
113 motility complex. To probe the integral OM nature of these proteins, we tested the sensitivity of  
114 GltA, GltB, and GltH in the OM to digestion by Proteinase K. In this assay, proteins that are  
115 largely surface-exposed are rapidly digested by addition of exogenous protease, unlike proteins  
116 that are protected by the membrane environment<sup>13,16</sup>. As expected for predicted integral OM  
117 proteins, GltA, GltB, and GltH were not readily susceptible to digestion by Proteinase K at the  
118 surface in WT cells (**Fig. 1B,C,D**). To probe the presence of an OM-platform protein complex,  
119 the Proteinase K susceptibility of a given constituent was tested in the absence of a different  
120 OM-platform protein; the rationale was that cell-surface topology for various OM-platform  
121 proteins could be altered due to a disrupted interaction network resulting from the missing  
122 platform component. As previously detected<sup>13</sup>, neither GltA nor GltB was stable in a mutant  
123 background lacking the other, as reflected by the lower levels of GltA in  $\Delta gltB$  cells and GltB in  
124  $\Delta gltA$  cells (compared to WT) (**Fig. 1B,C, Supplementary Fig. S1D**). This is consistent with  
125 the demonstrated interactions between these integral OM proteins<sup>13</sup>. Absence of GltK did not  
126 alter Proteinase K susceptibility of GltA, GltB, or GltH, indicating that this periplasm-facing OM  
127 lipoprotein<sup>13</sup> does not affect the topology of the OM-platform proteins (**Fig. 1B,C,D**). However,  
128 the absence of GltH rendered GltA and GltB more Proteinase K-sensitive (**Fig. 1B,C**).  
129 Similarly, GltH was more sensitive to Proteinase K digestion in the absence of GltA or GltB  
130 (**Fig. 1D**). The potential for these Proteinase K-susceptibility changes to be due to general OM  
131 defects in the respective mutants is unlikely as none of the mutant strains demonstrate obvious  
132 membrane and/or cell fitness defects<sup>13</sup>. These (and previous<sup>13</sup>) data thus support the existence of  
133 an integral OM complex formed by GltABH proteins (**Fig. 1A, panel ii**). Functional analysis of  
134 the role of the OM platform in regulating gliding-complex adhesion to the substratum was  
135 subsequently evaluated below.

136 ***CglB, a predicted  $\alpha$ -integrin-like protein, is a candidate motility adhesin***

137 We next searched for a candidate adhesin that might interact with the OM platform. The  
138 CglB protein is an ideal candidate because it is essential for efficient gliding motility<sup>4,15,17,18</sup>  
139 (**Supplementary Fig. S2A**), localizes to the bacterial OM<sup>14</sup>, and is pulled down as prey with  
140 various gliding complex members via GST chromatography using Glt-protein bait<sup>5</sup>. The *cglB*  
141 gene also co-occurs with those encoding the Agl–Glt machinery in bacterial genomes, supporting  
142 a functional link (**Supplementary Fig. S3**). Along with all Agl–Glt gliding apparatus  
143 components, we also found CglB to be required for “polymertropism” (**Supplementary Fig.**  
144 **S2D**), as determined by the ability of *M. xanthus* to preferentially spread in the direction of  
145 aligned substratum polymers<sup>19-21</sup>. This suggests that these proteins may play a role in probing  
146 the physical properties of the substratum at bFAs, similar to eukaryotic integrins that interact  
147 with the substratum and sense its physical properties at eFAs<sup>22-24</sup>.

148 Fold-recognition analysis of CglB indicated structural analogies with numerous metazoan  
149  $\alpha$ -integrins and structurally-similar Apicomplexan parasite gliding motility adhesins MIC2 and  
150 TRAP (from *Toxoplasma* and *Plasmodium*, respectively)<sup>25,26</sup> (**Supplementary Table S2**). The  
151 top bacterial match was the  $\alpha$ I/ $\alpha$ A-like GBS104 adhesive tip pilin<sup>27</sup> from *Streptococcus*  
152 *agalactiae* (**Supplementary Table S2**). Integrins typically possess an  $\alpha$  subunit in which a C-  
153 terminal domain of seven repeating beta blades constitutes a beta-propeller domain<sup>28</sup>. Of the 18  
154 human  $\alpha$ -subunit variants, half possess an additional module (termed  $\alpha$ I or  $\alpha$ A) in-between the  
155 2<sup>nd</sup> and 3<sup>rd</sup> propeller blades containing a VWA domain<sup>29</sup>, characterized by a Rossmann fold with  
156 multiple  $\alpha$ -helices shielding an interior  $\beta$ -sheet<sup>30</sup>. VWA domains typically function in cell  
157 adhesion and can be found in numerous proteins of the eukaryotic ECM. Generation of a CglB  
158 tertiary structure model, combined with analysis of evolutionarily-coupled amino acid positions  
159 within the protein, confirmed that CglB likely adopts the above-described  $\alpha$ I/ $\alpha$ A structure  
160 containing a VWA domain (**Fig. 2A, Supplementary Fig. S1E**). In particular, the VWA  
161 domain contains a predicted MIDAS (metal ion-dependent adhesion site) motif, a discontinuous  
162 structural feature (Asp-x-Ser-x-Ser...Thr...Asp). At this site, the coordination of a divalent  
163 metal ion (e.g. Mg<sup>2+</sup>/Mn<sup>2+</sup>/Ca<sup>2+</sup>) induces structural changes in VWA domains upon ligand  
164 binding that stabilize this adhesive domain in a high-affinity state for the ligand<sup>31</sup>. Incidentally,  
165 CglB-dependent gliding by individual cells on a hard substratum (**Fig. 2C**) was also found to  
166 require the presence of divalent cations (**Supplementary Figure S2G**). Highly-conserved

167 potential MIDAS residues in CglB map to D56, S58, S60, T182 and D211 (**Fig. 2A, inset**). We  
168 tested the functional significance of the putative CglB MIDAS motif in a complementation  
169 assay, ectopically expressing CglB<sub>WT</sub>, CglB<sub>D56A</sub>, and CglB<sub>S58A</sub> from the native *cglB* promoter.  
170 Contrary to  $\Delta cglB$  cells in which CglB<sub>WT</sub> expression restored motility, CglB<sub>D56A</sub> was stably  
171 expressed (unlike CglB<sub>S58A</sub>) but unable to complement gliding deficiency (**Supplementary Fig.**  
172 **S2E, F**).

173 An intact VWA domain thus appears essential for CglB stability and single-cell gliding  
174 motility. Direct demonstration of metal binding by the MIDAS motif of purified CglB was not  
175 possible due to insurmountable purification challenges attributed to the high CglB Cys content  
176 (17 out of 416 aa = 4.1%) (**Supplementary Fig. S2B**), with the majority of these residues  
177 predicted to localize in flexible loops (**Fig. 2A**). These Cys residues likely form structure-  
178 determining intra-protein disulphide bonds, as titration of the reducing agent DTT resulted in a  
179 migration shift from faster- to slower-moving CglB-specific bands via SDS-PAGE and  $\alpha$ -CglB  
180 Western immunoblot (**Fig. 2B**). These data are also consistent with the high sensitivity of  
181 single-cell gliding motility to low substratum concentrations of DTT (**Supplementary Fig.**  
182 **S2C**). Taken together, the VWA domain MIDAS motif and intra-protein disulphide bonds are  
183 likely important structural determinants of CglB.



184 ***CglB is essential for substratum-coupling of the Agl–Glt machinery***

185 We subsequently investigated the contribution of CglB to surface coupling of the Agl–Glt  
186 complex. To probe the role of CglB in bFA formation, we analyzed the dynamics of AglZ-YFP  
187 clusters in cells on hard agar for the  $\Delta cglB$  mutant (which stably expresses AglZ-YFP  
188 [Supplementary Fig. S4A]). AglZ-YFP clusters still appeared in  $\Delta cglB$  cells; however, in  
189 marked contrast to WT cells, AglZ-YFP clusters in  $\Delta cglB$  cells were not stationary relative to the  
190 substratum but rather moved directionally from one pole to the other (Fig. 2C,D and  
191 Supplementary Fig. S4B). This behaviour was similar to that observed in non-adhered motility  
192 complexes<sup>8</sup>. CglB is therefore required to assemble bFAs on hard agar surfaces. The function of  
193 CglB is clearly distinct from the OM-platform  $\beta$ -barrel proteins because trafficking AglZ-YFP  
194 clusters are not formed in any of the  $\Delta gltA/B/H$  mutant backgrounds<sup>8</sup>.

195 In  $\Delta cglB$  cells, trafficking AglZ-YFP clusters move in-and-out of the epifluorescence  
196 focal plane as they rotate counter-clockwise around the cell envelope (Fig. 1A, Supplementary  
197 Fig. S4B), making them difficult to precisely track and thus accurately study their dynamic  
198 properties. To resolve these difficulties, we recently developed a TIRFM assay in which *M.*  
199 *xanthus* cells glide in chitosan-coated microfluidic chambers (Supplementary Fig. S4C); in this  
200 system, trafficking AglZ-YFP clusters are also observable in WT cells due to the suboptimal  
201 nature of the chitosan surface for bFA adhesion<sup>8,32</sup>. Since the depth-of-field in TIRFM is  
202 restricted to near the cell–substratum interface, photobleaching is reduced and thus tracking of  
203 the trafficking AglZ-YFP clusters near the ventral face of the cell can be performed at high  
204 spatio-temporal resolution<sup>8</sup>. On chitosan,  $\Delta cglB$  cells were also non-motile and again,  
205 immobilized AglZ-YFP clusters could not be detected (Supplementary Fig. S4C). Trafficking  
206 AglZ-YFP clusters in  $\Delta cglB$  cells behaved similarly to those in WT cells; although slight effects  
207 were observed via TIRFM on the trafficking frequency of AglZ-YFP clusters (from the leading  
208 to the lagging cell poles), the trafficking speed and lifetime of AglZ-YFP clusters were  
209 unchanged in the absence of CglB (Fig. 2E-H). Since AglZ-YFP trafficking reflects the activity  
210 of the motility engine, we conclude that CglB does not affect motor activity, but rather its  
211 adhesion to the underlying substratum at bFAs.

212 To test the contribution of adhesive properties by CglB to the tip of the motility complex,  
213 we adopted a force microscopy approach; herein, force generation by the motility complex can  
214 be directly monitored in live *M. xanthus* cells immobilized atop a semi-solid 0.7% agarose



215 matrix deposited on glass slides<sup>11</sup>. Within this setting, the motility complex cannot propel cells  
216 (likely because it cannot adhere) but its activity can transport polystyrene beads deposited by an  
217 optical trap directly on the cell surface (**Fig. 2I**). Trafficking gliding-machinery units that collide  
218 and recruit such beads move them directionally over long distances<sup>11,12</sup> (**Supplementary Fig.**  
219 **S4D**). We therefore tested whether bead transport requires the CglB adhesin. Whereas beads  
220 were transported multiple times, at lengths up to ~8  $\mu\text{m}$ , along the surface of WT cells, such  
221 events were absent in  $\Delta\text{cglB}$  cells (**Fig. 2J**). This demonstrates that bead recruitment and  
222 trafficking requires CglB, consistent with adhesive and force transduction functions for CglB.

223 Taken together, we conclude that CglB is required for tethering the gliding motility  
224 complex to an engaged extracellular motif, be it a solid surface for cell gliding or cargo for  
225 transport in immobilized cells. Contrary to the OM-platform proteins GltA, B, and H<sup>8</sup> (see  
226 below), CglB is not required for Agl–Glt-complex assembly and trafficking suggesting that it  
227 functions to couple trafficking units to the substratum, as would be expected for an adhesin.

## 228 ***The Glt OM platform regulates CglB exposure and retention at the cell surface***

229 Our various attempts to localize CglB in gliding cells were unsuccessful due to loss of  
230 protein functionality when fused to fluorescent protein or epitope tags (the folding of CglB in the  
231 periplasmic space, as well as its transit across the OM, are likely limiting steps, see below).  
232 Localizing CglB to the cell surface is nevertheless essential because CglB is an OM  
233 lipoprotein<sup>14,15</sup>; as such it would canonically be thought to insert into the periplasmic leaflet of  
234 the OM, though the prevalence of surface-exposed lipoproteins is becoming more widely  
235 acknowledged<sup>33-35</sup>. Indeed, Proteinase K shaving of liquid-grown cells (in which the motility  
236 complex is not active) did not affect CglB stability, suggesting that CglB is periplasmically-  
237 oriented under these conditions (**Supplementary Fig. S5A**). One possibility is that CglB surface  
238 exposure is directly regulated by the Glt OM platform. To explore this possibility, we first  
239 compared CglB levels in whole-cell samples of each respective *glt* mutant strain. While present  
240 at comparable levels in  $\Delta$ *gltC*, *D*, *E*, *F*, *G*, *H*, *I*, and *J* backgrounds, cell-associated CglB was  
241 severely depleted in OM-platform mutants  $\Delta$ *gltA*,  $\Delta$ *gltB*, and  $\Delta$ *gltK* (but not  $\Delta$ *gltH*) (**Fig. 3A**).  
242 Fractionation analysis revealed that CglB was still produced by the  $\Delta$ *gltA/B/K* mutants (**Fig. 3B**);  
243 however, unlike in WT cells — where CglB was detected in whole-cell and outer-membrane  
244 vesicle (OMV) fractions — CglB in these three mutant backgrounds was only recovered in  
245 culture supernatants (**Fig. 3B**, **Supplementary Fig. S5B**). In the  $\Delta$ *gltA* and  $\Delta$ *gltB* mutants, such  
246 shedding to the supernatant was not observed for GltK (**Fig. 3B**), another OM lipoprotein  
247 required for gliding motility which remains OMV-associated, nor for the intracellular protein  
248 MglA, which was detected at levels comparable to the WT strain (**Fig. 3B**); together, these data  
249 indicate that cell integrity is not affected when components of the OM platform are disrupted.  
250 Therefore, cell-association (and thus OM localization) of CglB depends on GltA, GltB, and  
251 GltK.

252 Supernatant-localized CglB migrates faster than cell-associated CglB via SDS-PAGE (in  
253 both whole-cell and OMV samples) under equivalent denaturing conditions (**Fig. 3B**), suggesting  
254 that supernatant CglB is of reduced molecular weight and may have been proteolytically cleaved.  
255 Further support for proteolytic processing of CglB was provided via mass spectrometry analysis  
256 of tryptic peptides obtained from immunoprecipitated supernatant CglB, which revealed that the  
257 first 76 N-terminal residues were unaccounted for (**Supplementary Fig. S5C**). Our efforts at N-  
258 terminal sequencing of supernatant CglB were inconclusive, and as such we were unable to

259 determine the specific identity of the amino acids at the new N-terminus of the truncated protein.  
260 Thus CglB may be cleaved by a protease prior to its release into the supernatant. To test this  
261 hypothesis, we screened the effect of various protease inhibitors for their capacity at restoring  
262 CglB localization to the cell envelope. Growth in the presence of EDTA restored cell-associated  
263 CglB in this background (**Fig. 3C**). Similarly, EDTA also restored cell-associated CglB in the  
264  $\Delta gltK$  and  $\Delta gltA$  mutants (**Fig. 3D**; see below for discussion of doublet band). Resuspension of  
265 EDTA-grown  $\Delta gltB$  cells in EDTA-free buffer resulted in the resumption of CglB release from  
266 the cells, indicating that CglB restoration is not permanent, consistent with a protease inhibition  
267 effect (**Supplementary Fig. S5D**). Since EDTA chelates divalent cations, CglB release from  
268  $\Delta gltK/B/A$  cells would be consistent with the activity of a metalloprotease. While the  
269 involvement of a putative protease in CglB surface shedding awaits further clarification, the  
270 results suggest that interactions between CglB, GltA, GltB, and GltK regulate CglB cell-surface  
271 association.

272 To determine the subcellular site of CglB proteolytic processing in the  $\Delta gltA$ ,  $B$  and  $K$   
273 mutants, we took advantage of the fact that EDTA blocks proteolysis and probed surface-  
274 exposure of CglB via the Proteinase K shaving assay. In marked contrast to WT cells and in the  
275 presence of EDTA, cell-associated CglB (**Fig. 3D**) was immediately digested by Proteinase K in  
276 the  $\Delta gltK$ ,  $\Delta gltB$ , and  $\Delta gltA$  backgrounds (**Fig. 3E**, see below for discussion of doublet band).  
277 Interestingly, upon digestion of full-length CglB in  $\Delta gltA$  cells, there was an immediate  
278 appearance of a ~34 kDa CglB degradation product that persisted throughout the time course,  
279 suggesting that it was protected from further digestion. This protection required GltK and GltB  
280 as the ~34 kDa product was almost undetectable in these backgrounds (discussed further below).  
281 GltH is not as central as GltA and GltB with respect to surface retention of CglB because CglB  
282 remains cell-associated in the  $gltH$  mutant (**Fig. 3A**). Nevertheless, CglB also shows increased  
283 sensitivity to Proteinase K in the absence of GltH (with the appearance and steady accumulation  
284 of an ~34 kDa Proteinase K-resistant band), suggesting that a fraction of the CglB population is  
285 also surface exposed (**Fig. 3E**). These results thus indicate that CglB becomes surface-exposed  
286 in the absence of individual OM-platform components GltA, B, K, and to a lesser extent GltH  
287 (see Discussion).  
288

289 ***The Glt OM proteins are required for CglB exposure at the cell surface***

290 Two hypotheses could explain the cell-surface protease sensitivity of CglB in  
291  $\Delta$ *gltA/B/K/H* cells: (i) CglB accesses the cell surface via an as-yet unknown system and interacts  
292 with the Glt OM platform proteins, which shield it from the action of the putative surface  
293 metalloprotease. Alternatively, (ii) the Glt OM platform proteins are directly responsible for  
294 CglB cell-surface exposure through a regulated process that becomes constitutive as soon as one  
295 of its components (i.e. GltA, B, K, and to a lesser extent H) is removed.

296 To discriminate between these hypotheses, we probed cell-association of CglB in  
297  $\Delta$ *gltABH* triple-mutant cells lacking any of the  $\beta$ -barrel components of the OM platform. The  
298 level of cell-associated CglB in these triple-mutant cells was markedly restored (although not  
299 fully to WT levels, possibly due to stabilization of CglB by interactions with the OM gliding  
300 proteins) (**Fig. 3F**). This rules out the first hypothesis. Using various combinations of double  $\beta$ -  
301 barrel component knockouts, CglB restoration was found to minimally require the simultaneous  
302 deletion of *gltA* and *gltH* (**Fig. 3F**). To examine whether the restoration of cell-associated CglB  
303 was due to a lack of surface exposure of the adhesin, we performed Proteinase K shaving of  
304  $\Delta$ *gltABH* cells. In this background, CglB was fully protected from digestion by Proteinase K,  
305 illustrating that CglB is no longer surface-exposed (**Fig. 3G**). Taken together, the above results  
306 indicate that interactions between GltA, B, K and H regulate CglB exposure at the cell surface.  
307 Importantly, full Proteinase K-protection of CglB in the  $\Delta$ *gltABH* triple mutant (i) is a strong  
308 indication that these proteins play a central role in modulating CglB surface exposure, and (ii)  
309 rules out non-specific OM defects in the absence of OM platform components.

310 ***GltK is required for CglB function in vivo***

311 While analysing CglB restoration in EDTA-grown cells, CglB was observed to migrate  
312 as two bands in WT cells: a major slower-migrating band and a minor faster-migrating band  
313 (**Fig. 3D**). In similar conditions, only the faster-moving band was observed in the  $\Delta gltK$   
314 background. Thus, GltK could be involved in the formation of the slower-migrating species, a  
315 process in which it may be assisted by GltB and to a lesser extent by GltA, because the slower-  
316 migrating form accumulated to various ratios in these mutants, with almost full efficiency in the  
317  $\Delta gltA$  mutant (**Fig. 3D**). It is not currently clear if the two CglB forms result from a stabilization  
318 or maturation effect of GltK on CglB, but the slower-migrating CglB band constitutes the most  
319 abundant species in WT extracts (**Fig. 3D**) and thus probably represents the functional form of  
320 CglB, which we subsequently confirmed (see below).

321 GltK could potentially interact with CglB via Cys residues as it also possesses a high Cys  
322 ratio (9 out of 184 aa = 4.9%) relative to other Glt proteins (**Supplementary Fig. S2B**) and  
323 displays redox-dependent folding (**Fig. 4A**); but in the absence of an *in vitro* assay with purified  
324 proteins, this could not be directly tested. Nevertheless, the potential for GltK to promote CglB  
325 function *in vivo* was examined via two further experiments. First, TIRFM-analyzed clusters in  
326  $\Delta gltK$  cells revealed cluster behaviour analogous to that observed in  $\Delta cglB$  cells (**Fig. 2C-G**);  
327 namely, clusters travelled directionally within  $\Delta gltK$  cells with lifetimes equivalent to those in  
328 WT cells, but with higher trafficking frequency (**Fig. 4B, C, D**). The trafficking speed of  
329 clusters was found to be statistically faster in  $\Delta gltK$  cells compared to WT (**Supplementary Fig.**  
330 **S4E**), but within the same tight range already described for  $\Delta cglB$  cells (**Fig. 2F**). In contrast, no  
331 trafficking clusters were observed in  $\Delta gltA$  cells (**Fig. 4B**), consistent with previous results<sup>8</sup>.  
332 This demonstrates that although GltA is required for cluster formation and trafficking, GltK is  
333 not (similar to CglB). Combined with the Proteinase K-susceptibility data (**Fig. 1B, C**), these  
334 results suggest that in the absence of GltK, the OM platform is assembled and conducive to  
335 AglZ-YFP trafficking but that CglB-mediated adhesion is not functional.

336 We next sought to genetically demonstrate that GltK permits CglB to function *in vivo*.  
337 We thus exploited the known ability of *M. xanthus* to transfer OM lipoproteins between  
338 compatible cells by a process known as OM exchange (OME)<sup>36</sup>. During OME, direct  
339 interactions of TraA OM receptors lead to transient OM fusion synapses between adjacent cells  
340 and efficient exchange of OM lipids and lipoproteins between contacting cells<sup>37,38</sup>. In this

341 manner, OME of CglB can efficiently rescue gliding motility when donor CglB<sup>+</sup> cells are mixed  
342 with recipient CglB<sup>-</sup> cells<sup>15</sup>. GltK (previously CglC) is also a transferable OM lipoprotein<sup>13,17</sup>.  
343 Therefore, we reasoned that if  $\Delta gltK$  cells were mixed with  $\Delta cglB$  cells, motility rescue of the  
344  $\Delta cglB$  cells would only occur if bi-directional OME allows GltK transfer (from the  $\Delta cglB$  donor  
345 cells) to activate CglB in the  $\Delta gltK$  cells (**Fig. 4E**). To ensure that gliding motility rescue could  
346 only arise from the *trans*-complementation of the  $\Delta cglB$  cells, an *aglQ* mutation was added to the  
347 CglB<sup>+</sup> donor, thus deleting an essential component of the Agl gliding motor<sup>11</sup>. This motor  
348 protein cannot be transferred via OME as it is an integral IM protein. Introduction of a  
349 fluorescent mCherry marker into the CglB<sup>-</sup> recipient strain allowed for (i) direct observation of  
350 motility rescue (**Fig. 4F**) and (ii) separation of mCherry<sup>+</sup> cells via fluorescence-activated cell  
351 sorting (FACS) (**Fig. 4G**) for testing of CglB transfer by Western immunoblot. The  $\Delta aglQ$   
352 donor strain functioned as an effective donor for both CglB and GltK, ensuring that the  
353 experiment could be performed (**Fig. 4F**, Mix 1 & Mix 2). Upon mixing  $\Delta aglQ \Delta gltK$  double-  
354 mutant cells (GltK<sup>-</sup> CglB<sup>+</sup>) with mCherry<sup>+</sup>  $\Delta cglB$  (GltK<sup>+</sup> CglB<sup>-</sup>) cells, gliding motility of the  
355 mCherry<sup>+</sup> cells was restored (**Fig. 4F**, Mix 3). Western immunoblotting of FACS-separated  
356 mCherry<sup>+</sup> cells (**Fig. 4G**) confirmed that this gliding restoration was due to CglB transfer (**Fig.**  
357 **4H**).

358 The prediction that GltK transfer from GltK<sup>+</sup> CglB<sup>-</sup> cells to GltK<sup>-</sup> CglB<sup>+</sup> cells is essential  
359 for CglB transfer and stimulation of GltK<sup>+</sup> CglB<sup>-</sup> cell motility was tested by mixing  $\Delta aglQ$   
360  $\Delta gltK$  cells (GltK<sup>-</sup> CglB<sup>+</sup>) with an mCherry<sup>+</sup>  $\Delta cglB \Delta gltK$  (CglB<sup>-</sup> GltK<sup>-</sup>) strain. In this case, no  
361 motility stimulation was observed (**Fig. 4E,F**, Mix 4) nor was any CglB transferred via OME  
362 (**Fig. 4H**). The lack of CglB transfer is likely due to a defect in CglB maturation/stabilization  
363 that occurs in the absence of GltK because mixing a  $\Delta gltA$  mutant — where CglB is also secreted  
364 but where the slower-migrating CglB form accumulates to near-WT levels (**Fig. 3D**) — with a  
365  $\Delta cglB$  mutant still resulted in efficient motility stimulation (GltA itself is not transferable  
366 [**Supplementary Fig. S6**]). GltK is thus required for CglB function *in vivo* by promoting the  
367 accumulation of the slower-migrating CglB band, which either occurs as GltK protects CglB  
368 from proteolysis or promotes a maturation step.

369 **DISCUSSION:**

370 Previously, we demonstrated that on hard surfaces *Myxococcus* cells are propelled by  
371 directionally-transported Agl–Glt complexes that become tethered at bFAs where they exert  
372 traction forces against the underlying substratum<sup>8</sup>. However, while we demonstrated that the  
373 external OM Glt proteins are effectively anchored to the surface, the specific protein(s)  
374 conferring the adhesive properties, as well as the mechanism by which such adhesion is  
375 regulated to promote forward movements, remained unknown. The characterization of CglB, a  
376 protein first studied >40 years ago<sup>17</sup>, and its interactions with the OM Glt proteins provides a  
377 solution to these questions.

378 Together, the data described in our current investigation indicate that CglB exposure at  
379 the cell surface and its proper functioning is a complex process requiring the concerted actions of  
380 a host of additional proteins such as GltK, GltB, GltA, and GltH. Combining these data with  
381 previously-published findings, we propose the following model for CglB-mediated surface  
382 coupling of the Agl–Glt complex at bFAs:

- 383 (i) Following its assembly at the leading cell pole, the cytoplasmic–IM–periplasmic Agl–Glt  
384 complex contacts the periplasmic face of OM gliding machinery modules, constituted by  
385 GltKBAH “loaded” with CglB, through the peptidoglycan meshwork; this initiates a  
386 right-handed helical movement of the machinery toward the lagging cell pole. No bFA is  
387 formed until the complex reaches the “ventral side” of the cell that lies in contact with the  
388 underlying substratum (**Fig. 5, Step 1**).
- 389 (ii) Once the cytoplasmic–IM–periplasmic module contacts a substratum-associated OM  
390 module, the contractile force/action of the cytoplasmic–IM–periplasmic module on the  
391 OM complex “fires” CglB into activated contact with the substratum (**Fig. 5, Step 2**).  
392 Substratum-anchored CglB is thus connected across the OM by GltK and the associated  
393 GltABH OM proteins, interacting with other periplasmic Glt proteins<sup>8</sup>. This physically  
394 links the substratum and the IM motor, allowing for force transduction (**Fig. 5, Step 3**, see  
395 below).
- 396 (iii) After the power stroke of the IM constituents of the Agl–Glt machinery, the substratum-  
397 adhered OM module is displaced, resulting in displacement of the OM and peptidoglycan  
398 sacculus (**Fig. 5, Step 4**). Displacement requires substratum-bound CglB to be turned  
399 over to allow new OM modules (containing CglB not yet bound to the substratum) to



400 interact with the IM motor (**Fig. 5, Step 4**) and to propel the screw-like movement of the  
401 cell (**Fig. 5, Step 5**). Such turnover could occur by site-specific proteolysis of CglB,  
402 regulated by the GltABHK complex (**Fig. 5, Step 3**). This hypothesis is attractive  
403 because proteolytic turnover also occurs for integrin adhesions in metazoans<sup>39</sup> and de-  
404 regulation of CglB secretion triggers cell-surface cleavage of CglB at its N-terminus.  
405 However, this proteolytic event could also be a natural consequence of unregulated  
406 surface exposure of the adhesin in liquid-grown cells, with other potential adhesin-  
407 cycling mechanisms functioning instead on solid surfaces.

408  
409 Our findings assign an adhesion function to the CglB lipoprotein and provide a potential  
410 mechanism explaining the manner in which this protein accesses the cell surface. While OM  
411 lipoproteins are generally thought to be exposed on the periplasmic leaflet of the OM, surface-  
412 exposed lipoproteins have recently come to the fore in bacterial cell biology<sup>34</sup>. Although several  
413 scenarios have been proposed, the surface-exposure mechanism has not been solved for most of  
414 these lipoproteins<sup>33</sup>. Interestingly in *Escherichia coli*, RcsF, an OM lipoprotein sensor of cell-  
415 envelope stress, becomes exposed at the cell surface as it interacts with the  $\beta$ -barrel porin  
416 OmpA<sup>40,41</sup>. For CglB, our results suggest that OM translocation could be more complex and  
417 driven by a dedicated system formed by the GltA, B, H, and K proteins. On the periplasmic  
418 leaflet of the OM, GltK promotes CglB function via a maturation or stabilization process, which  
419 is also somewhat assisted by GltA and GltB. It is not currently clear whether GltA, B, and H  
420 form a complex that secretes CglB directly or whether it regulates the secretion activity of  
421 another system. While the latter cannot be formally ruled out, the data suggests that GltH and  
422 GltA could form pores that secrete CglB redundantly, with GltH functioning as the major pore:  
423 (i) GltH is responsible for constitutive CglB secretion in the  $\Delta gltA$ ,  $B$ , and  $K$  mutants, and (ii) the  
424 simultaneous deletion of *gltA* and *gltH* abolishes CglB secretion. The CglB adhesin is partially  
425 accessible to Proteinase K in the absence of GltH (whereas it is fully protected in WT cells) also  
426 suggesting the existence of a minor GltH-independent route to the cell surface. Solving the  
427 actual structure and exact interactions within the OM platform is an ambitious endeavour, but it  
428 will be ultimately necessary to understand the manner in which interactions between three  
429 predicted porin-like proteins regulate CglB surface exposure.

430

431 CglB secretion in liquid-grown cells is not observed in WT cells and is likely a by-  
432 product of the sensitized genetic backgrounds. Thus in WT cells CglB surface exposure appears  
433 tightly controlled. We propose that CglB is only exposed at bFAs following dynamic  
434 interactions between the IM and OM complexes<sup>8</sup>. The exact protein interaction cascade has yet  
435 to be defined, but the proton-motor-associated IM-spanning proteins GltG/J have been proposed  
436 to undergo motor-driven extension/retraction cycles in a retractile mechanism that would allow  
437 cyclic interaction with the OM complex through the peptidoglycan<sup>8</sup>. Both proteins carry  
438 predicted TolA/TonB-like flexible periplasmic domains and globular periplasmic TonB\_C  
439 domains<sup>3,8</sup>. In ExbBD-TonB systems, these domains interact with TonB-box motifs in OM  
440 receptor proteins. Both OM  $\beta$ -barrel proteins GltB and GltA contain extended, unstructured N-  
441 terminal domains, with a potential TonB-box consensus sequence in the former<sup>8</sup>. Thus, the  
442 motorized IM proteins could mechanically act on the OM platform loaded with CglB, resulting  
443 in its export past the OM (through the OM platform or as-yet unidentified proteins) and  
444 activation of the adhesin upon engagement of the substratum. Conceptually, this mechanism  
445 could be compared to the firing of a gunlock cannon in which an arm (GltG/J) exerts mechanical  
446 force on a lanyard (TonB box on the Glt OM module), resulting in firing of a projectile (CglB)  
447 through the barrel of the cannon (GltABH).

448 We therefore propose that the gliding motility complex functions akin to a secretion  
449 apparatus, in which a trafficking unit permits the surface exposure and cycling of an adhesin  
450 when assembled at bFAs. Energy for the secretion process would come from the H<sup>+</sup> gradient<sup>11</sup>.  
451 In bacteria, TonB-dependent transporters (TBDTs) are generally viewed as macromolecular  
452 import systems for siderophores and carbohydrates, but recently, the *Myxococcus*  $\beta$ -barrel TBDT  
453 Oar was found to be required for secretion of a developmental protease across the OM<sup>42</sup>. Thus,  
454 protein secretion may be an overlooked function of TBDTs, which should now be taken into  
455 account when studying these systems. In particular, the secretory function of the Agl–Glt system  
456 may shed light on its evolutionary origin. Previously, we demonstrated that the Agl–Glt system  
457 potentially evolved from a general class of envelope systems with functions as diverse as cellular  
458 motility and spore coat assembly<sup>43,44</sup>. Bacterial genome-mining analyses indicate that  
459 deltaproteobacterial Agl–Glt-like systems may have evolved following acquisition and a  
460 dramatic expansion of a widely-conserved gammaproteobacterial “core” complex<sup>43,44</sup>.  
461 Importantly, this proposed core system is constituted by seven conserved genes (encoding AglQ,

462 R, S, GltC, D, E, and G homologues) including one encoding a putative TBDT (AglRQS–GltG)  
463 and OM proteins in the periplasmic leaflet (GltD and E). The original function of the core  
464 complex is not known but its composition could be sufficient for protein secretion. This scenario  
465 is hypothetical but the results reported herein demonstrate that *Myxococcus* gliding motility and  
466 protein secretion are intertwined; this appears to be a common theme across diverse bacterial  
467 motility mechanisms as exemplified by flagellar motility (Type-III secretion), twitching motility  
468 (Type-IV pili/Type-II secretion), and Bacteroidetes gliding motility<sup>45,46</sup>. Bacteroidetes gliding  
469 presents an interesting parallel: a Type-IX secretion system secretes a gliding motility adhesin  
470 (SprB) which becomes propelled along the cell surface by the gliding machinery<sup>47-50</sup>. In fact, the  
471 Type-IX secretion system may be directly embedded into the Bacteroidetes gliding machinery;  
472 thus although they are evolutionarily distant, Bacteroidetes and myxobacterial gliding motility  
473 may follow similar operational principles.

474 Finally, the discovery that CglB acts as an essential adhesin of the gliding motility  
475 complex further highlights functional parallels between bFA and eFA mechanisms. In  
476 eukaryotic cells, the migration of surface-adhered cells via eFA-based locomotion involves the  
477 coordinated actions of a trans-envelope suite of proteins to transduce integrin-mediated cell–  
478 substratum adhesion to mechanical force and movement to propel the cell forward. Adhesion to  
479 the substratum at sites of activated integrins is regulated in multiple ways, including via cellular  
480 chaperones<sup>51</sup> and surface proteases<sup>39,52</sup>. Similar to eFAs, bFAs also interact with a secreted  
481 ECM<sup>53</sup>; herein the CglB VWA domain could potentially probe the physical properties of the  
482 substratum, akin to the scenario in eukaryotic integrins<sup>22-24</sup>. Thus, the fundamental requirements  
483 for integrin-coupled focal adhesion-based motility may be similar in metazoan, protozoan, and  
484 bacterial cells. These parallels could be important to further elucidate the mechanisms by which  
485 motility promotes multicellular behaviors<sup>54</sup>: similar to eukaryotic integrins, CglB could act as a  
486 sensor, regulating cell-cell interactions during development and predation.

487 **ACKNOWLEDGEMENTS:**

488           The authors would like to thank (i) Joel Selkrig and Nicholas Nickerson for valuable  
489 suggestions and troubleshooting regarding protease accessibility, (ii) Robert Fieldhouse for  
490 insightful discussions on protein modelling and evolutionary couplings, (iii) Sabrina Gauthier for  
491 cloning pSWU30-pCglB<sub>WT</sub>, (iv) Lotte Søgaard-Andersen for the kind gift of  $\alpha$ -GltK,  $\alpha$ -GltB, and  
492  $\alpha$ -GltA polyclonal antibodies, (v) Vincent Géli for the contribution of  $\alpha$ -mCherry polyclonal  
493 antibodies, (vi) Alain Roussel and Renaud Vincentelli (CNRS – Aix-Marseille University,  
494 Architecture et fonction des macromolécules biologiques) for CglB protein used to generate  
495 pAb, and (vii) Régine Lebrun, Pascal Mansuelle, and Rémy Puppo of the Mediterranean Institute  
496 of Microbiology’s Proteomics Platform for insightful discussions and sample processing for  
497 mass spectrometry. A Discovery operating grant (no. RGPIN-2016-06637) from the Natural  
498 Sciences and Engineering Research Council of Canada and a Discovery Award (2018-1400)  
499 from the Banting Research Foundation fund work in the lab of S.T.I. The former, as well as  
500 graduate studentships from the PROTEO research network, support N.Y.J.’s and F.S.’s studies.  
501 Work in the lab of T.M. is supported through a European Research Council (ERC) starting grant  
502 (DOME 261105) and a coup d’élan pour la recherche française award (2011) from the  
503 Bettencourt–Schueller foundation. Work in the J.W.S. lab was supported by a grant (CAREER  
504 PHY-0844466) from the National Science Foundation (NSF). S.T.I. was previously supported  
505 by a post-doctoral fellowship in T.M.’s group from the Canadian Institutes of Health Research  
506 and the AMIDEX excellence program of Aix-Marseille University. L.M.F. was funded by  
507 T.M.’s ERC grant and a 4<sup>th</sup>-year thesis fellowship from the Fondation ARC. B.P.B was  
508 supported by funds from the Glenn Centers for Aging Research and the National Institutes of  
509 Health (P50 GM071508). Work from the M.S. lab was supported by a grant from the NSF  
510 (IOS135462). None of the abovementioned funding sources had any input in the preparation of  
511 this article, or in the work described herein.

512 **AUTHOR CONTRIBUTIONS:**

513 STI and TM conceived of and planned the study. STI performed bright field microscopy  
514 and stereoscopy. STI and BJB carried out epifluorescence microscopy, with fluorescent cluster  
515 analysis by TM. JBF completed TIRFM, with analysis by LMF. STI, NYJ, and FS quantified  
516 cell motility. STI and AMB performed force microscopy, with analysis by AMB and JWS. LM  
517 and GB carried out FACS experiments. GS generated phylogenetic data. STI performed protein  
518 modelling and evolutionary coupling analysis. STI, LM, and BF generated mutant constructs.  
519 DJL tested polymertropism responses, with analysis by STI and DJL. STI, LM, and NYJ  
520 performed all Proteinase K digestions and processed all Western blots. LM performed  
521 fractionation assays. BF generated anti-CglB pAb. STI and TM wrote the manuscript. STI and  
522 TM generated figures. STI, MN, MS, AGG, JWS, and TM contributed personnel and/or funding  
523 support.

524 **DECLARATION OF INTERESTS:**

525 The authors declare no competing interests.

526 **REFERENCES:**

- 527 <sup>1</sup> Sun Z, Guo SS, & Fässler R, Integrin-mediated mechanotransduction. *J Cell Biol* **215**, 445-  
528 456 (2016).
- 529 <sup>2</sup> Kanchanawong P, Shtengel G, Pasapera AM, Ramko EB, Davidson MW, Hess HF, &  
530 Waterman CM, Nanoscale architecture of integrin-based cell adhesions. *Nature* **468**, 580-  
531 584 (2010).
- 532 <sup>3</sup> Islam ST & Mignot T, The mysterious nature of bacterial surface (gliding) motility: a focal  
533 adhesion-based mechanism in *Myxococcus xanthus*. *Semin Cell Dev Biol* **46**, 143-154  
534 (2015).
- 535 <sup>4</sup> Luciano J, Agrebi R, Le Gall AV, Wartel M, Fiegna F, Ducret A, Brochier-Armanet C, &  
536 Mignot T, Emergence and modular evolution of a novel motility machinery in bacteria.  
537 *PLOS Genet* **7**, e1002268 (2011).
- 538 <sup>5</sup> Nan B, Mauriello EMF, Sun I-H, Wong A, & Zusman DR, A multi-protein complex from  
539 *Myxococcus xanthus* required for bacterial gliding motility. *Mol Microbiol* **76**, 1539-1554  
540 (2010).
- 541 <sup>6</sup> Nan B, Bandaria JN, Moghtaderi A, Sun I-H, Yildiz A, & Zusman DR, Flagella stator  
542 homologs function as motors for myxobacterial gliding motility by moving in helical  
543 trajectories. *Proc Natl Acad Sci USA* **110**, E1508-E1513 (2013).
- 544 <sup>7</sup> Fu G, Bandaria JN, Le Gall AV, Fan X, Yildiz A, Mignot T, Zusman DR, & Nan B,  
545 MotAB-like machinery drives the movement of MreB filaments during bacterial gliding  
546 motility. *Proc Natl Acad Sci U S A* **115**, 2484-2489 (2018).
- 547 <sup>8</sup> Faure LM, Fiche J-B, Espinosa L, Ducret A, Anantharaman V, Luciano J, Lhospice S, Islam  
548 ST, Tréguier J, Sotes M, Kuru E, Van Nieuwenhze MS, Brun Y, Théodoly O, L A,  
549 Nollmann M, & Mignot T, The mechanism of force transmission at bacterial focal adhesion  
550 complexes. *Nature* **539**, 530-535 (2016).
- 551 <sup>9</sup> Mauriello EMF, Mouhamar F, Nan B, Ducret A, Dai D, Zusman DR, & Mignot T, Bacterial  
552 motility complexes require the actin-like protein, MreB and the Ras homologue, MglA.  
553 *EMBO J* **29**, 315-326 (2010).
- 554 <sup>10</sup> Treuner-Lange A, Macia E, Guzzo M, Hot E, Faure L, Jakobczak B, Espinosa L, Alcor D,  
555 Ducret A, Keilberg D, Castaing JP, Gervais SL, Franco M, Søgaard-Andersen L, & Mignot  
556 T, The small G-protein MglA connects to the MreB actin cytoskeleton at bacterial focal  
557 adhesions. *J Cell Biol* **210**, 243-256 (2015).
- 558 <sup>11</sup> Sun M, Wartel M, Cascales E, Shaevitz JW, & Mignot T, Motor-driven intracellular  
559 transport powers bacterial gliding motility. *Proc Natl Acad Sci USA* **108**, 7559-7564 (2011).
- 560 <sup>12</sup> Balagam R, Litwin DB, Czerwinski F, Sun M, Kaplan HB, Shaevitz JW, & Igoshin OA,  
561 *Myxococcus xanthus* gliding motors are elastically coupled to the substrate as predicted by  
562 the focal adhesion model of gliding motility. *PLoS Comput Biol* **10**, e1003619 (2014).



- 563 13 Jakobczak B, Keilberg D, Wuichet K, & Sogaard-Andersen L, Contact- and protein transfer-  
564 dependent stimulation of assembly of the gliding motility machinery in *Myxococcus*  
565 *xanthus*. *PLoS Genet* **11**, e1005341 (2015).
- 566 14 Kahnt Jr, Aguiluz K, Koch Jr, Treuner-Lange A, Konovalova A, Huntley S, Hoppert M,  
567 Sogaard-Andersen L, & Hedderich R, Profiling the outer membrane proteome during growth  
568 and development of the social bacterium *Myxococcus xanthus* by selective biotinylation and  
569 analyses of outer membrane vesicles. *J Proteome Res* **9**, 5197-5208 (2010).
- 570 15 Rodriguez AM & Spormann AM, Genetic and molecular analysis of *cglB*, a gene essential  
571 for single-cell gliding in *Myxococcus xanthus*. *J Bacteriol* **181**, 4381-4390 (1999).
- 572 16 Selkig J *et al.*, Discovery of an archetypal protein transport system in bacterial outer  
573 membranes. *Nat Struct Mol Biol* **19**, 506-510 (2012).
- 574 17 Hodgkin J & Kaiser D, Cell-to-cell stimulation of movement in nonmotile mutants of  
575 *Myxococcus*. *Proc Natl Acad Sci USA* **74**, 2938-2942 (1977).
- 576 18 Youderian P, Burke N, White DJ, & Hartzell PL, Identification of genes required for  
577 adventurous gliding motility in *Myxococcus xanthus* with the transposable element *mariner*.  
578 *Mol Microbiol* **49**, 555-570 (2003).
- 579 19 Lemon DJ, Yang X, Srivastava P, Luk Y-Y, & Garza AG, Polymertropism of rod-shaped  
580 bacteria: movement along aligned polysaccharide fibers. *Sci Rep* **7**, 7643 (2017).
- 581 20 Lemon DJ, Schutzman DA, & Garza AG, Bacterial surface spreading is more efficient on  
582 nematically aligned polysaccharide substrates. *J Bacteriol* **200**, e00610-00617 (2018).
- 583 21 Fontes M & Kaiser D, *Myxococcus* cells respond to elastic forces in their substrate. *Proc*  
584 *Natl Acad Sci USA* **96**, 8052-8057 (1999).
- 585 22 Lazopoulos KA & Stamenović D, Durotaxis as an elastic stability phenomenon. *J Biomech*  
586 **41**, 1289-1294 (2008).
- 587 23 Vincent LG, Choi YS, Alonso-Latorre B, del Álamo JC, & Engler AJ, Mesenchymal stem  
588 cell durotaxis depends on substrate stiffness gradient strength. *Biotechnol J* **8**, 472-484  
589 (2013).
- 590 24 Lo C-M, Wang H-B, Dembo M, & Wang Y-l, Cell movement is guided by the rigidity of the  
591 substrate. *Biophys J* **79**, 144-152 (2000).
- 592 25 Song G, Koksai AC, Lu C, & Springer TA, Shape change in the receptor for gliding motility  
593 in *Plasmodium* sporozoites. *Proc Natl Acad Sci USA* **109**, 21420-21425 (2012).
- 594 26 Song G & Springer TA, Structures of the *Toxoplasma* gliding motility adhesin. *Proc Natl*  
595 *Acad Sci USA* **111**, 4862-4867 (2014).

- 596 <sup>27</sup> Krishnan V, Dwivedi P, Kim BJ, Samal A, Macon K, Ma X, Mishra A, Doran KS, Ton-That  
597 H, & Narayana SVL, Structure of *Streptococcus agalactiae* tip pilin GBS104: a model for  
598 GBS pili assembly and host interactions. *Acta Crystallogr D Biol Crystallogr* **69**, 1073-1089  
599 (2013).
- 600 <sup>28</sup> Chouhan B, Denesyuk A, Heino J, Johnson MS, & Denessiouk K, Conservation of the  
601 human integrin-type beta-propeller domain in bacteria. *PLOS ONE* **6**, e25069 (2011).
- 602 <sup>29</sup> Shimaoka M & Springer TA, Therapeutic antagonists and conformational regulation of  
603 integrin function. *Nat Rev Drug Discov* **2**, 703-716 (2003).
- 604 <sup>30</sup> Whittaker CA & Hynes RO, Distribution and evolution of von Willebrand/integrin A  
605 domains: widely dispersed domains with roles in cell adhesion and elsewhere. *Mol Biol Cell*  
606 **13**, 3369-3387 (2002).
- 607 <sup>31</sup> Shimaoka M, Takagi J, & Springer TA, Conformational regulation of integrin structure and  
608 function. *Annu Rev Biophys Biomol Struct* **31**, 485-516 (2002).
- 609 <sup>32</sup> Tréguier J, Bugnicourt L, Gay G, Diallo M, Islam ST, Toro A, David L, Théodoly O, Sudre  
610 G, & Mignot T, Chitosan films for microfluidic studies of single bacteria and perspectives  
611 for antibiotic susceptibility testing. *mBio* **10**, e01375-01319 (2019).
- 612 <sup>33</sup> Wilson MM & Bernstein HD, Surface-exposed lipoproteins: an emerging secretion  
613 phenomenon in Gram-negative bacteria. *Trends Microbiol* **24**, 198-208 (2016).
- 614 <sup>34</sup> Konovalova A & Silhavy TJ, Outer membrane lipoprotein biogenesis: Lol is not the end.  
615 *Philos Trans R Soc Lond B Biol Sci* **370** (2015).
- 616 <sup>35</sup> Hooda Y & Moraes TF, Translocation of lipoproteins to the surface of gram negative  
617 bacteria. *Curr Opin Struct Biol* **51**, 73-79 (2018).
- 618 <sup>36</sup> Cao P, Dey A, Vassallo CN, & Wall D, How myxobacteria cooperate. *J Mol Biol* **427**, 3709-  
619 3721 (2015).
- 620 <sup>37</sup> Cao P & Wall D, Direct visualization of a molecular handshake that governs kin recognition  
621 and tissue formation in myxobacteria. *Nat Commun* **10**, 3073 (2019).
- 622 <sup>38</sup> Ducret A, Fleuchot B, Bergam P, & Mignot T, Direct live imaging of cell-cell protein  
623 transfer by transient outer membrane fusion in *Myxococcus xanthus*. *eLife* **2**, e00868 (2013).
- 624 <sup>39</sup> Giebeler N & Zigrino P, A disintegrin and metalloprotease (ADAM): historical overview of  
625 their functions. *Toxins* **8**, 122 (2016).
- 626 <sup>40</sup> Cho S-H, Szewczyk J, Pesavento C, Zietek M, Banzhaf M, Roszczenko P, Asmar A, Laloux  
627 G, Hov A-K, Leverrier P, Van der Henst C, Vertommen D, Typas A, & Collet J-F,  
628 Detecting envelope stress by monitoring  $\beta$ -barrel assembly. *Cell* **159**, 1652-1664 (2014).

- 629 41 Konovalova A, Perlman DH, Cowles CE, & Silhavy TJ, Transmembrane domain of surface-  
630 exposed outer membrane lipoprotein RcsF is threaded through the lumen of  $\beta$ -barrel  
631 proteins. *Proc Natl Acad Sci USA* **111**, E4350-E4358 (2014).
- 632 42 Gómez-Santos N, Glatter T, Koebnik R, Świątek-Połatyńska MA, & Søgaard-Andersen L, A  
633 TonB-dependent transporter is required for secretion of protease PopC across the bacterial  
634 outer membrane. *Nat Commun* **10**, 1360 (2019).
- 635 43 Wartel M, Ducret A, Thutupalli S, Czerwinski F, Le Gall A-V, Mauriello EMF, Bergam P,  
636 Brun YV, Shaevitz J, & Mignot T, A versatile class of cell surface directional motors gives  
637 rise to gliding motility and sporulation in *Myxococcus xanthus*. *PLoS Biol* **11**, e1001728  
638 (2013).
- 639 44 Agrebi R, Wartel M, Brochier-Armanet C, & Mignot T, An evolutionary link between  
640 capsular biogenesis and surface motility in bacteria. *Nat Rev Microbiol* **13**, 318-326 (2015).
- 641 45 Costa TRD, Felisberto-Rodrigues C, Meir A, Prevost MS, Redzej A, Trokter M, &  
642 Waksman G, Secretion systems in Gram-negative bacteria: structural and mechanistic  
643 insights. *Nat Rev Microbiol* **13**, 343-359 (2015).
- 644 46 McBride MJ, Bacteroidetes gliding motility and the Type IX secretion system. *Microbiol*  
645 *Spectr* **7** (2019).
- 646 47 Nelson SS, Bollampalli S, & McBride MJ, SprB is a cell surface component of the  
647 *Flavobacterium johnsoniae* gliding motility machinery. *J Bacteriol* **190**, 2851-2857 (2008).
- 648 48 Nakane D, Sato K, Wada H, McBride MJ, & Nakayama K, Helical flow of surface protein  
649 required for bacterial gliding motility. *Proc Natl Acad Sci U S A* **110**, 11145-11150 (2013).
- 650 49 Shrivastava A, Roland T, & Berg Howard C, The screw-like movement of a gliding  
651 bacterium is powered by spiral motion of cell-surface adhesins. *Biophys J* **111**, 1008-1013  
652 (2016).
- 653 50 Shrivastava A & Berg HC, A molecular rack and pinion actuates a cell-surface adhesin and  
654 enables bacterial gliding motility. *Sci Adv* **6**, eaay6616 (2020).
- 655 51 Murphy-Ullrich JE & Sage EH, Revisiting the matricellular concept. *Matrix Biol* **37**, 1-14  
656 (2014).
- 657 52 Kelwick R, Desanlis I, Wheeler GN, & Edwards DR, The ADAMTS (A Disintegrin and  
658 Metalloproteinase with Thrombospondin motifs) family. *Genome Biol* **16**, 1-16 (2015).
- 659 53 Ducret A, Valignat M-P, Mouhamar F, Mignot T, & Theodoly O, Wet-surface-enhanced  
660 ellipsometric contrast microscopy identifies slime as a major adhesion factor during  
661 bacterial surface motility. *Proc Natl Acad Sci USA* **109**, 10036-10041 (2012).
- 662 54 Islam ST, Vergara Alvarez I, Saïdi F, Guiseppi A, Vinogradov E, Sharma G, Espinosa L,  
663 Morrone C, Brasseur G, Guillemot J-F, Benarouche A, Bridot J-L, Ravicoularamin G,

- 664 Cagna A, Gauthier C, Singer M, Fierobe H-P, Mignot T, & Mauriello EMF, Modulation of  
665 bacterial multicellularity via spatio-specific polysaccharide secretion. *PLOS Biol* **18**,  
666 e3000728 (2020).
- 667 <sup>55</sup> Reese MG, Application of a time-delay neural network to promoter annotation in the  
668 *Drosophila melanogaster* genome. *Comput Chem* **26**, 51-56 (2001).
- 669 <sup>56</sup> Goldman BS *et al.*, Evolution of sensory complexity recorded in a myxobacterial genome.  
670 *Proc Natl Acad Sci USA* **103**, 15200-15205 (2006).
- 671 <sup>57</sup> Han K, Li ZF, Peng R, Zhu LP, Zhou T, Wang LG, Li SG, Zhang XB, Hu W, Wu ZH, Qin  
672 N, & Li YZ, Extraordinary expansion of a *Sorangium cellulosum* genome from an alkaline  
673 milieu. *Sci Rep* **3**, 2101 (2013).
- 674 <sup>58</sup> Huntley S, Hamann N, Wegener-Feldbrugge S, Treuner-Lange A, Kube M, Reinhardt R,  
675 Klages S, Muller R, Ronning CM, Nierman WC, & Sogaard-Andersen L, Comparative  
676 genomic analysis of fruiting body formation in Myxococcales. *Mol Biol Evol* **28**, 1083-1097  
677 (2011).
- 678 <sup>59</sup> Huntley S, Kneip S, Treuner-Lange A, & Sogaard-Andersen L, Complete genome sequence  
679 of *Myxococcus stipitatus* strain DSM 14675, a fruiting myxobacterium. *Genome Announc* **1**,  
680 e00100-00113 (2013).
- 681 <sup>60</sup> Huntley S, Zhang Y, Treuner-Lange A, Kneip S, Sensen CW, & Sogaard-Andersen L,  
682 Complete genome sequence of the fruiting myxobacterium *Coralloccoccus coralloides* DSM  
683 2259. *J Bacteriol* **194**, 3012-3013 (2012).
- 684 <sup>61</sup> Ivanova N *et al.*, Complete genome sequence of Haliangium ochraceum type strain (SMP-  
685 2T). *Stand Genomic Sci* **2**, 96-106 (2010).
- 686 <sup>62</sup> Li Z-F, Li X, Liu H, Liu X, Han K, Wu Z-H, Hu W, Li F-f, & Li Y-Z, Genome sequence of  
687 the halotolerant marine bacterium *Myxococcus fulvus* HW-1. *J Bacteriol* **193**, 5015-5016  
688 (2011).
- 689 <sup>63</sup> Müller S, Willett JW, Bahr SM, Darnell CL, Hummels KR, Dong CK, Vlamakis HC, &  
690 Kirby JR, Draft genome sequence of *Myxococcus xanthus* wild-type strain DZ2, a model  
691 organism for predation and development. *Genome Announc* **1**, e00217-00213 (2013).
- 692 <sup>64</sup> Schneiker S *et al.*, Complete genome sequence of the myxobacterium *Sorangium*  
693 *cellulosum*. *Nat Biotech* **25**, 1281-1289 (2007).
- 694 <sup>65</sup> Sharma G, Khatri I, & Subramanian S, Complete genome of the starch-degrading  
695 myxobacteria *Sandaracinus amylolyticus* DSM 53668T. *Genome Biol Evol* **8**, 2520-2529  
696 (2016).
- 697 <sup>66</sup> Sharma G, Narwani T, & Subramanian S, Complete genome sequence and comparative  
698 genomics of a novel myxobacterium *Myxococcus hansupus*. *PLOS ONE* **11**, e0148593  
699 (2016).

- 700 <sup>67</sup> Stevens DC, Young J, Carmichael R, Tan J, & Taylor RE, Draft genome sequence of  
701 gephyronic acid producer *Cystobacter violaceus* strain Cb vi76. *Genome Announc* **2**,  
702 e01299-01214 (2014).
- 703 <sup>68</sup> Sharma G & Subramanian S, Unravelling the complete genome of *Archangium gephyra*  
704 DSM 2261T and evolutionary insights into myxobacterial chitinases. *Genome Biol Evol* **9**,  
705 1304-1311 (2017).
- 706 <sup>69</sup> Sharma G, Khatri I, & Subramanian S, Comparative genomics of myxobacterial  
707 chemosensory systems. *J Bacteriol* **200**, e00620-00617 (2018).
- 708 <sup>70</sup> Wu M & Eisen JA, A simple, fast, and accurate method of phylogenomic inference. *Genome*  
709 *Biol* **9**, R151 (2008).
- 710 <sup>71</sup> Stamatakis A, RAxML-VI-HPC: maximum likelihood-based phylogenetic analyses with  
711 thousands of taxa and mixed models. *Bioinformatics* **22**, 2688-2690 (2006).
- 712 <sup>72</sup> Nudleman E, Wall D, & Kaiser D, Cell-to-cell transfer of bacterial outer membrane  
713 lipoproteins. *Science* **309**, 125-127 (2005).
- 714 <sup>73</sup> Pathak DT & Wall D, Identification of the *cglC*, *cglD*, *cglE*, and *cglF* genes and their role in  
715 cell contact-dependent gliding motility in *Myxococcus xanthus*. *J Bacteriol* **194**, 1940-1949  
716 (2012).
- 717 <sup>74</sup> Johnson LS, Eddy SR, & Portugaly E, Hidden Markov model speed heuristic and iterative  
718 HMM search procedure. *BMC Bioinformatics* **11**, 431 (2010).
- 719 <sup>75</sup> Letunic I & Bork P, Interactive tree of life (iTOL) v3: an online tool for the display and  
720 annotation of phylogenetic and other trees. *Nucleic Acids Res* **44**, W242-W245 (2016).
- 721 <sup>76</sup> Rice P, Longden I, & Bleasby A, EMBOSS: The European molecular biology open software  
722 suite. *Trends Genet* **16**, 276-277 (2000).
- 723 <sup>77</sup> Drozdetskiy A, Cole C, Procter J, & Barton GJ, JPred4: a protein secondary structure  
724 prediction server. *Nucl Acids Res* (2015).
- 725 <sup>78</sup> Letunic I, Doerks T, & Bork P, SMART: recent updates, new developments and status in  
726 2015. *Nucl Acids Res* **43**, D257-D260 (2015).
- 727 <sup>79</sup> Söding J, Biegert A, & Lupas AN, The HHpred interactive server for protein homology  
728 detection and structure prediction. *Nucl Acids Res* **33**, W244-W248 (2005).
- 729 <sup>80</sup> Källberg M, Wang H, Wang S, Peng J, Wang Z, Lu H, & Xu J, Template-based protein  
730 structure modeling using the RaptorX web server. *Nat Protoc* **7**, 1511-1522 (2012).
- 731 <sup>81</sup> Barbato A, Benkert P, Schwede T, Tramontano A, & Kosinski J, Improving your target-  
732 template alignment with MODalign. *Bioinformatics* **28**, 1038-1039 (2012).

- 733 <sup>82</sup> Šali A & Blundell TL, Comparative protein modelling by satisfaction of spatial restraints. *J*  
734 *Mol Biol* **234**, 779-815 (1993).
- 735 <sup>83</sup> Vehlow C, Stehr H, Winkelmann M, Duarte JM, Petzold L, Dinse J, & Lappe M, CMView:  
736 interactive contact map visualization and analysis. *Bioinformatics* **27**, 1573-1574 (2011).
- 737 <sup>84</sup> Wang S, Li W, Zhang R, Liu S, & Xu J, CoinFold: a web server for protein contact  
738 prediction and contact-assisted protein folding. *Nucleic Acids Res* **44**, W361-W366 (2016).
- 739 <sup>85</sup> Ducret A, Quardokus EM, & Brun YV, MicrobeJ, a tool for high throughput bacterial cell  
740 detection and quantitative analysis. *Nat Microbiol* **1**, 16077 (2016).
- 741 <sup>86</sup> Wang S, Arellano-Santoyo H, Combs PA, & Shaevitz JW, Measuring the bending stiffness  
742 of bacterial cells using an optical trap. *J Vis Exp*, e2012 (2010).  
743



744 **FIGURE TITLES AND LEGENDS:**

745

746 **Figure 1: Evidence of an Integral OM Complex Formed by GltA, B, and H.**

747 **A)** Gliding motility mediated by bFAs in *M. xanthus*. Following their assembly at the leading  
748 pole, motility complexes move toward the lagging cell pole in a counter clockwise (CCW)  
749 rotational trajectory. Clockwise (CW) and CCW directionalities are defined by observing the cell  
750 cylinder from the leading pole in the *y,z* plane. When the complexes interact with the substratum,  
751 they form bacterial focal adhesion (bFA, concentric circles) sites and propel rotational  
752 movements of the cell. *Panel (i)*: bFAs are formed according to two possible mechanisms: In the  
753 viscous interaction model, the periplasmic complex accumulates at bFAs and pushes against the  
754 elastic peptidoglycan (PG) to create cell envelope deformations at bFAs and thus create viscous  
755 interactions with the substratum. The function of the outer-membrane (OM) complex is not  
756 accounted for in this model. In the elastic model, the periplasmic complex establishes transient  
757 interactions through the PG, contacting the OM complex which itself interacts with the  
758 substratum via an unknown adhesive molecule (*pink circle*). *Panel (ii)*: Proposed Glt OM  
759 platform based on previous reports and this study. The OM localization of GltA, GltB, GltH,  
760 GltC and GltK is based on structural bioinformatic as well as fractionation analyses presented  
761 here and elsewhere<sup>4,13,14</sup>. The integral association of GltA, B and H is based on bioinformatic  
762 and Proteinase K accessibility assays in this study and another report<sup>13</sup>. Direct GltA–GltB,  
763 GltA–GltC, and GltB–GltC interactions were already biochemically demonstrated by pull-down  
764 assays<sup>13</sup>. The connection with GltH is further indicated from results reported in this study. The  
765 periplasmic leaflet (*orange*) and outer leaflet (*yellow*) of the OM are indicated. Legend: Peri,  
766 periplasm.

767 Western immunoblot of **B)** GltA, **C)** GltB, and **D)** GltH susceptibility to digestion by Proteinase  
768 K in OM-module Agl–Glt mutant strains. Digestion aliquots were removed at 15-min intervals  
769 and TCA-precipitated to stop digestion. Legend for Panels B, C, and D: ◀, full-length protein;  
770 ○, loading control (non-specific protein band labelled by the respective  $\alpha$ -GltA/ $\alpha$ -GltB/ $\alpha$ -GltH  
771 pAb).



# FIGURE 1

**A**

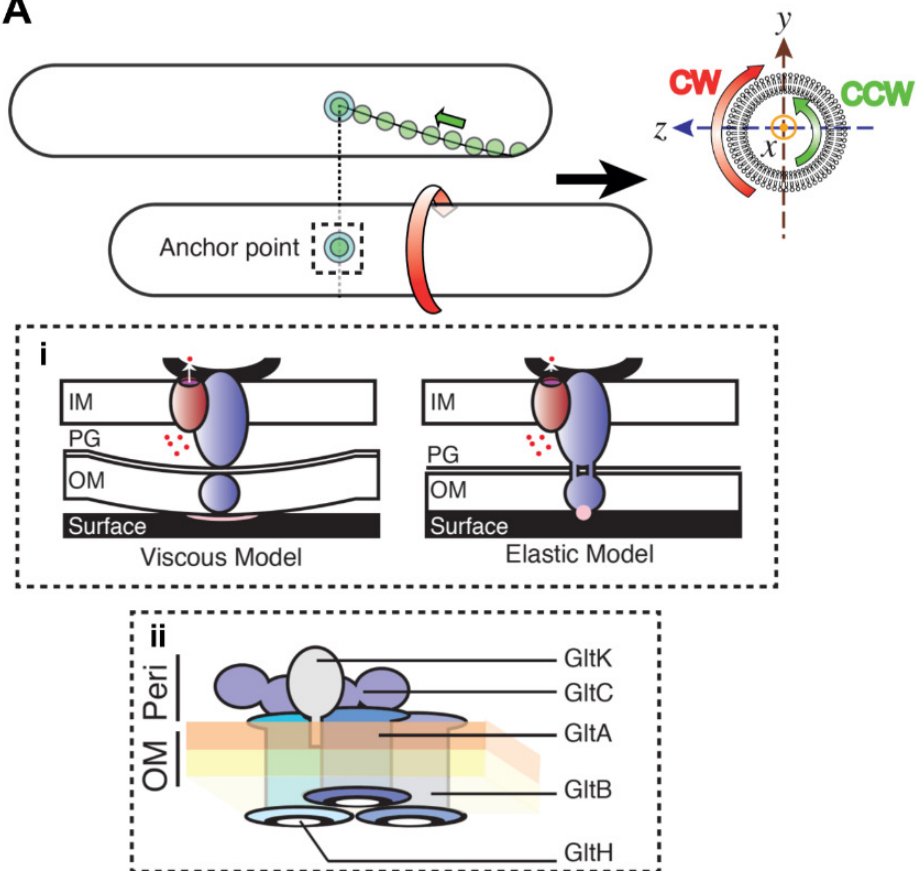

**B**

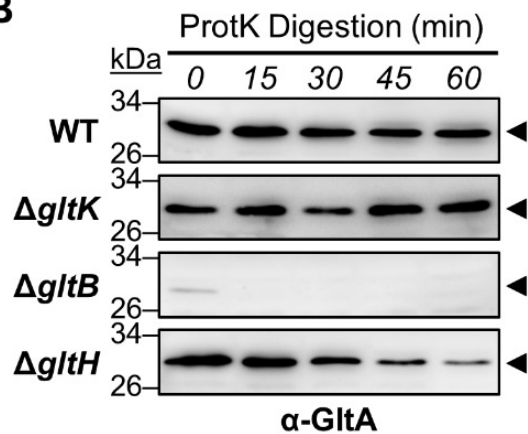

**C**

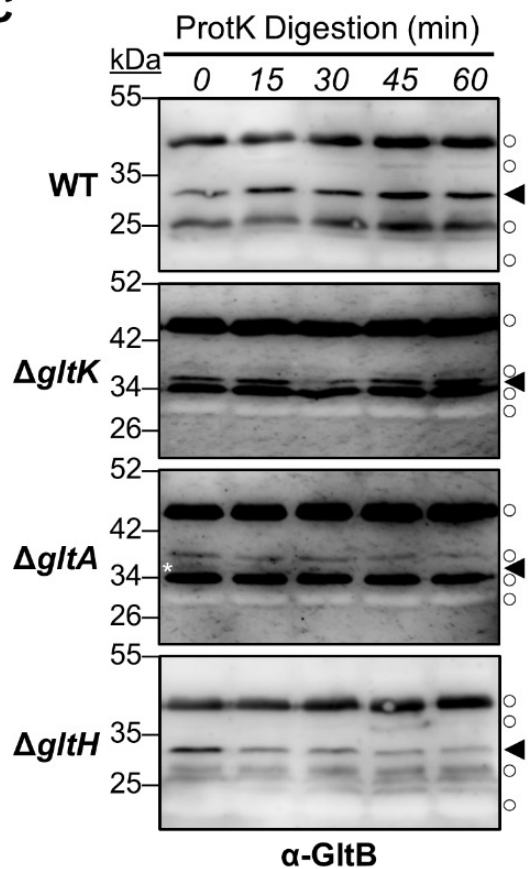

**D**

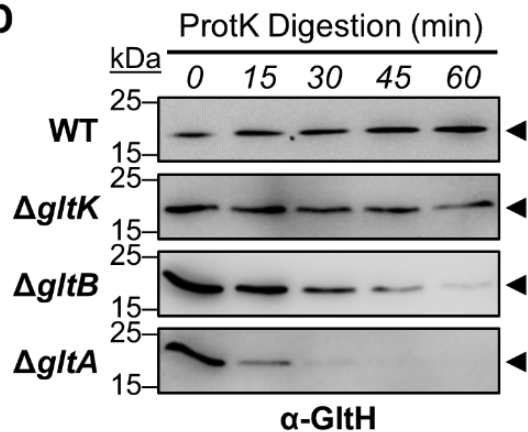

773 **Figure 2: CglB, a protein with a potential  $\alpha$ -integrin-like fold, is essential for motility**  
774 **complex adhesion to the substratum**

775 **A)** Tertiary structure homology model of CglB. The N- and C-terminus of the protein are  
776 indicated. Colour code: *yellow*,  $\beta$ -strands; *red*,  $\alpha$ -helices, *black spheres*, Cys residues. Dotted  
777 line denotes a magnified view of the MIDAS motif containing residues D56, S58, S60, T182,  
778 D211. See also [Supplementary Figs. S1E, S2E, F](#) and [Supplementary Table S2](#).

779 **B)**  $\alpha$ -CglB Western blot of WT whole-cell extracts treated with increasing concentrations of  
780 DTT to break disulphide bonds. Legend: ◀, full-length CglB; ○, loading control (non-specific  
781 protein band labelled by  $\alpha$ -CglB pAb). See also [Supplementary Fig. S2B](#).

782 **C)** Kymograph in WT vs.  $\Delta cglB$  cells indicating AglZ-YFP cluster position over time (hashed  
783 lines). Scale bar: 2  $\mu$ m. Legend: white arrowheads, AglZ-YFP clusters followed for their entire  
784 lifetime; black arrowheads, AglZ-YFP clusters followed for an incomplete lifetime. See also  
785 [Supplementary Fig. S4B](#).

786 **D)** Mean-squared displacement (MSD) analysis of AglZ-YFP cluster position tracking in WT (n  
787 = 48 clusters) and  $\Delta cglB$  (n = 23 clusters) *M. xanthus* cells. The mean of MSD at each time  
788 interval is displayed  $\pm$  SEM, with a second-order polynomial line fit to each dataset.

789 **E)** Frequency of trafficking Agl-Glt complexes via TIRFM (of AglZ-YFP) on chitosan-coated  
790 glass surfaces in PDMS microfluidic chambers for WT (n = 44 cells) and  $\Delta cglB$  (n = 41 cells)  
791 strains. The distribution of the two datasets are significantly different (\*), as calculated via  
792 unpaired two-tailed Mann-Whitney U-test ( $p < 0.05$ ). See also [Supplementary Fig. S4C](#).

793 **F)** Speed of Agl-Glt complex trafficking via TIRFM (of AglZ-YFP) on chitosan-coated glass  
794 surfaces in PDMS microfluidic chambers for WT (n = 260 clusters) and  $\Delta cglB$  (n = 371 clusters)  
795 strains. The distribution of the two datasets are not significantly different, as calculated via  
796 unpaired two-tailed Mann-Whitney U-test ( $p > 0.05$ ). See also [Supplementary Fig. S4C](#).

797 **G)** Stability of trafficking Agl-Glt complexes via TIRFM (of AglZ-YFP) on chitosan-coated  
798 glass surfaces in PDMS microfluidic chambers for WT (n = 333 clusters) and  $\Delta cglB$  (n = 409  
799 clusters) strains. The distribution of the two datasets are not significantly different, as calculated  
800 via unpaired two-tailed Mann-Whitney U-test ( $p > 0.05$ ). See also [Supplementary Fig. S4C](#).

801 **H)** Directionality of trafficked Agl-Glt complexes via TIRFM (of AglZ-YFP) on chitosan-  
802 coated glass surfaces for WT (n = 44 cells) and  $\Delta cglB$  (n = 41 cells) strains. “Front” and “back”  
803 are defined as cell poles with high and low AglZ-YFP fluorescence intensity, respectively.

804 Relative to the respective reference WT cluster type, only the distribution of front-to-back  
805 clusters were significantly different in the  $\Delta cglB$  cells ( $p < 0.05$ ); all other cluster types did not  
806 display distributions different from WT ( $p > 0.05$ ), as calculated via unpaired two-tailed Mann-  
807 Whitney U-test. See also [Supplementary Fig. S4C](#).

808 **I)** Trafficking of surface-deposited polystyrene beads on *M. xanthus* cells. Images were acquired  
809 at 10 s intervals. See also [Supplementary Fig. S4D](#).

810 **J)** Length of tracked bead runs  $> 0.1 \mu\text{m}$  in *M. xanthus* cells. Images from 10 s intervals were  
811 analyzed. See also [Supplementary Fig. S4D](#).

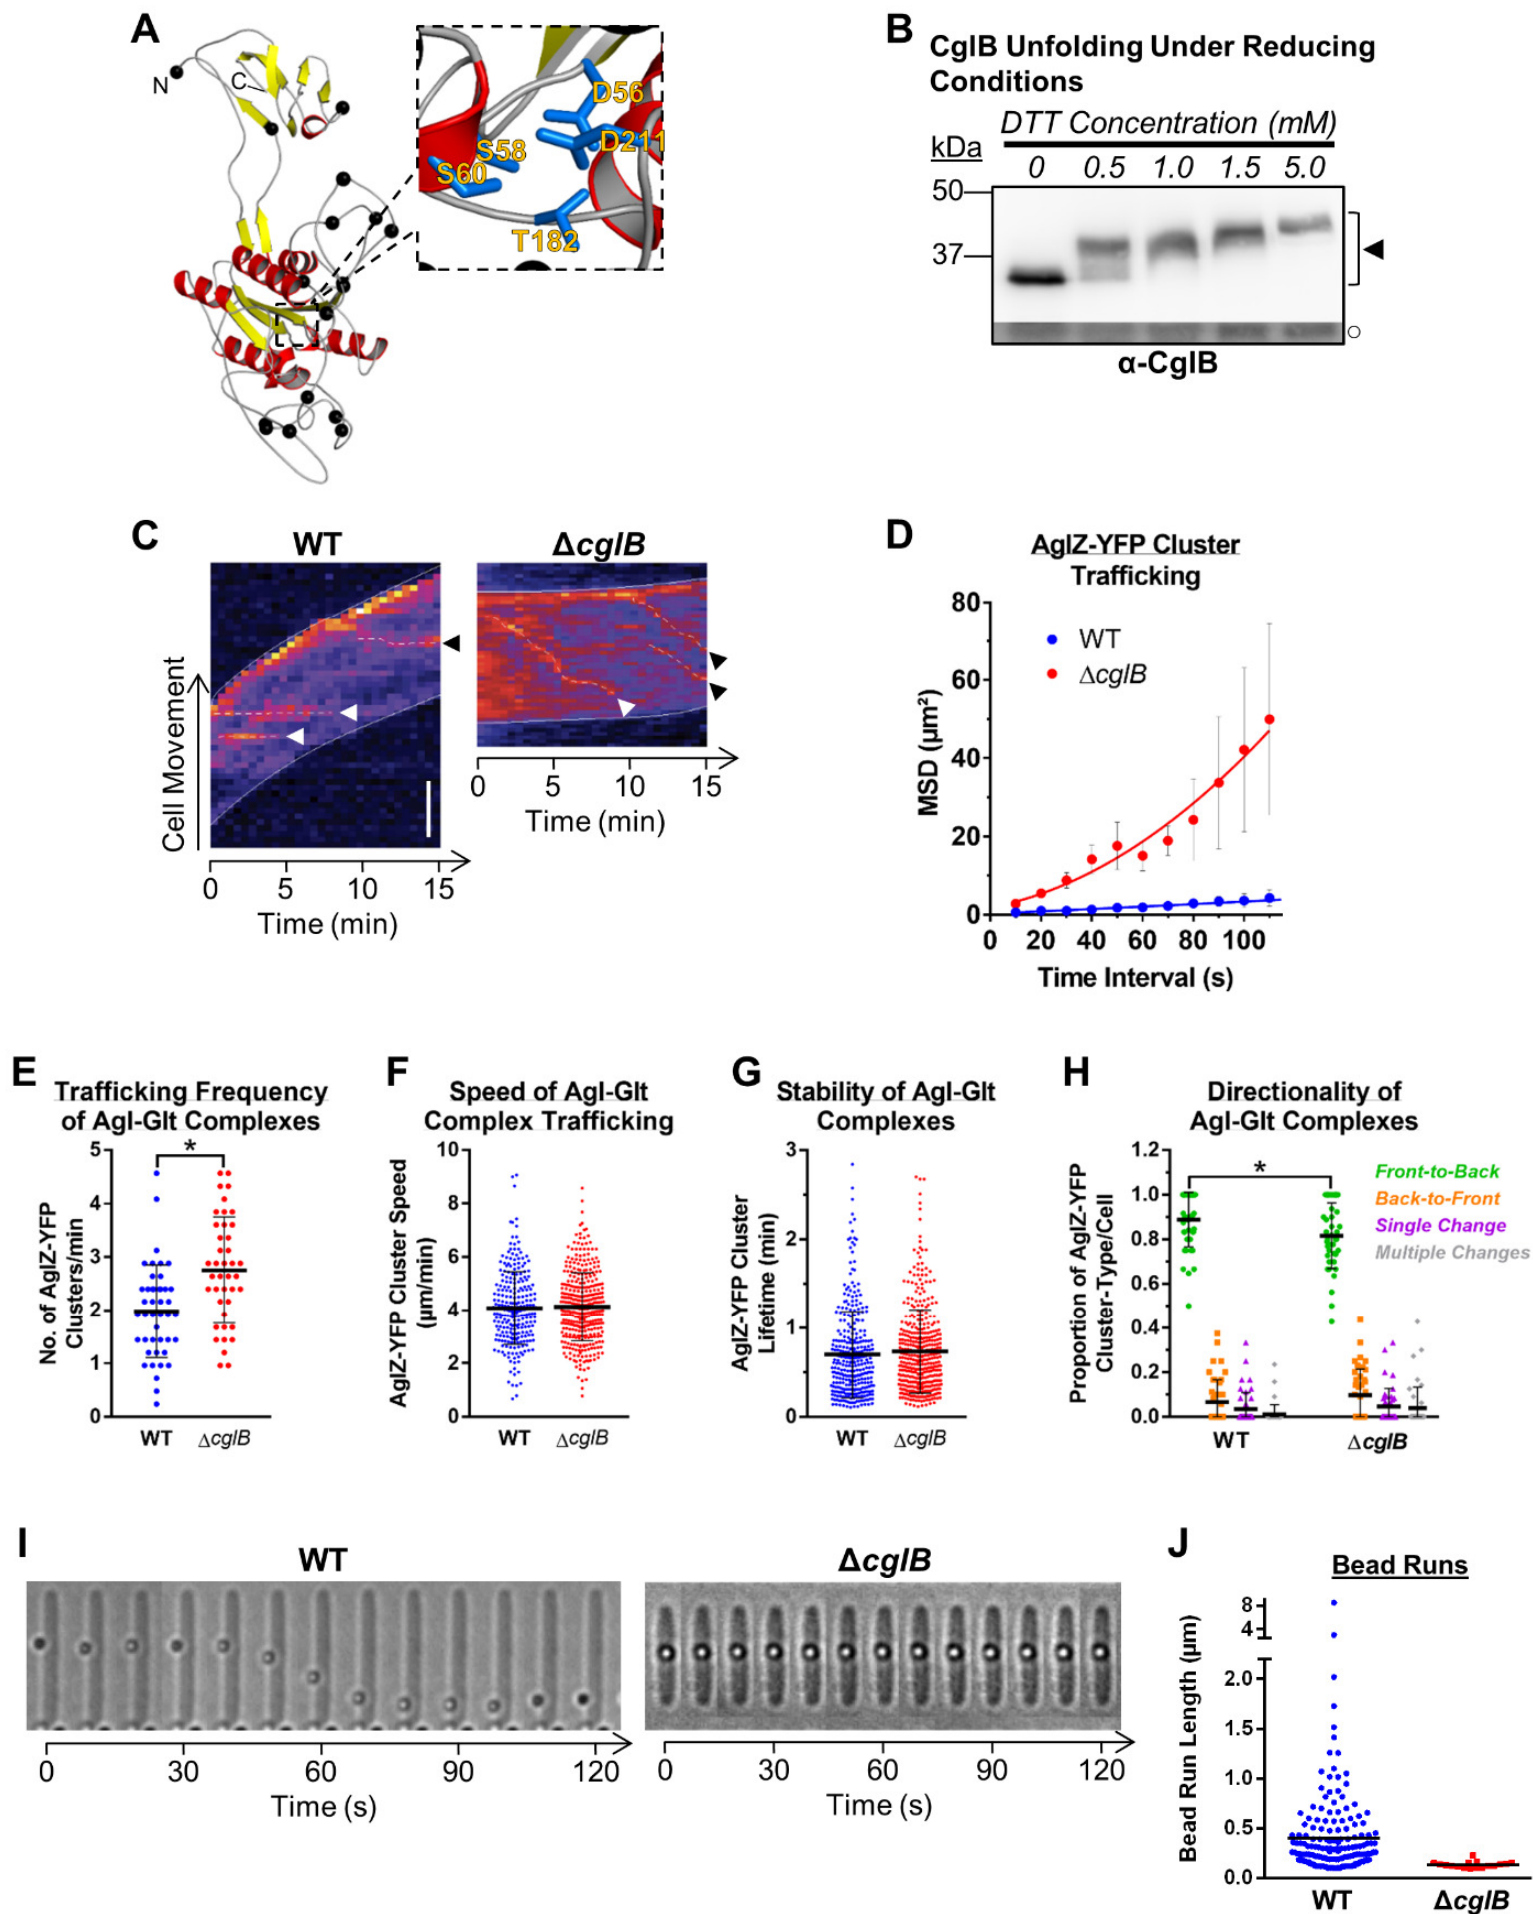

813 **Figure 3: CglB Secretion is Mediated by the Glt OM Platform**

814  $\alpha$ -CglB Western blots from:

815 **A)** Whole-cell extracts from different  $\Delta$ *glt* mutants. Non-adjacent lanes on the blot are separated  
816 by vertical black lines. White space separates two distinct blots processed at the same time.

817 **B)** Fractionated samples containing whole cells (WC), supernatants (Sup), and outer-membrane  
818 vesicles (OMV) from various genetic backgrounds. Detection of the gliding motility OM  
819 lipoprotein GltK was added as a control, with the protein only detected in WC and OMV  
820 samples, showing that the various mutations do not affect OM integrity, with the supernatant  
821 localization in this instance being specific to CglB. MglA is a cytoplasmic protein added as a  
822 control to show that cell lysis is negligible and does not account for the presence of CglB in  
823 supernatants. Legend: ◀, full-length protein; ○, loading control (non-specific protein band  
824 labelled by the respective pAb).

825 **C)** Whole-cell extracts from  $\Delta$ *gltB* cells grown in the presence of different protease inhibitors.  
826 White space separates two distinct blots from the same experiment.

827 **D)** Restoration of cell-associated CglB in EDTA-grown  $\Delta$ *gltK/B/A* cells. Different ratios of the  
828 slower- and faster-migrating bands were observed depending on the mutation of the specific  
829 strain. Lower, darker zones on each blot correspond to sections of the same blot image for which  
830 the contrast has been increased to highlight lower-intensity protein bands. Legend: ◀, full-  
831 length CglB; ○, loading control (non-specific protein band labelled by  $\alpha$ -CglB pAb).

832 **E)** Protein samples from cells resuspended in TPM buffer and digested with exogenous  
833 Proteinase K. Aliquots of the digestion mixture were removed at 15-min intervals and TCA-  
834 precipitated to stop digestion. “P” and “P<sub>EDTA</sub>” denote lanes containing the untreated parent  
835 strain and the parent strain grown in the presence of EDTA, respectively. Lower, darker zones  
836 on each blot correspond to sections of the same blot image for which the contrast has been  
837 increased to highlight lower-intensity protein bands. Legend: ◀, full-length CglB; ←, CglB  
838 degradation band; ○, loading control (non-specific protein band labelled by  $\alpha$ -CglB antibody).  
839 See also [Supplementary Fig. S5A](#).

840 **F)** Whole-cell extracts from different combinations of  $\Delta$ *glt* OM-module mutations in the same  
841 strain. Non-adjacent lanes on the blot are separated by vertical black lines. Legend: ◀, full-  
842 length CglB; ○, loading control (non-specific protein band labelled by  $\alpha$ -CglB pAb).

843 **G)** Protein samples from cells resuspended in TPM buffer and digested with exogenous  
844 Proteinase K. Aliquots of the digestion mixture were removed at 15-min intervals and TCA-  
845 precipitated to stop digestion. Legend: ◀, full-length CglB; ○, loading control (non-specific  
846 protein band labelled by  $\alpha$ -CglB pAb).



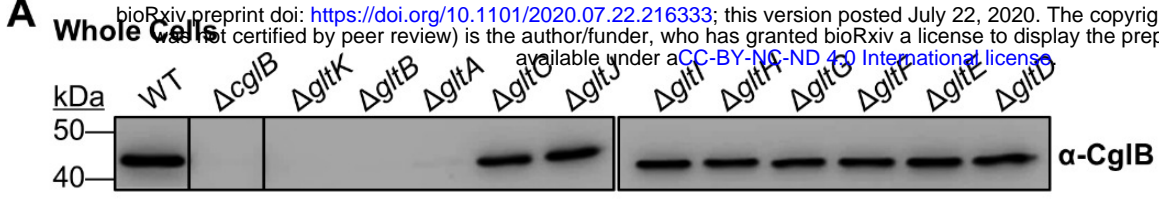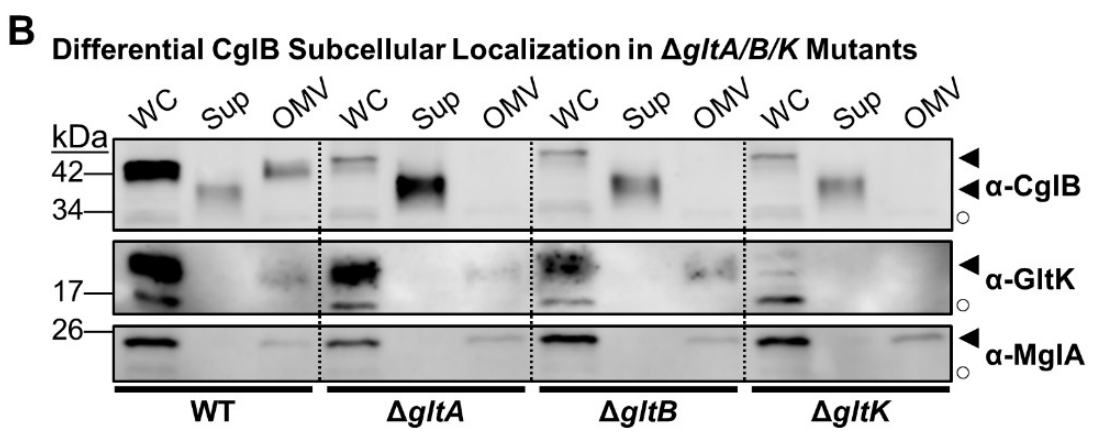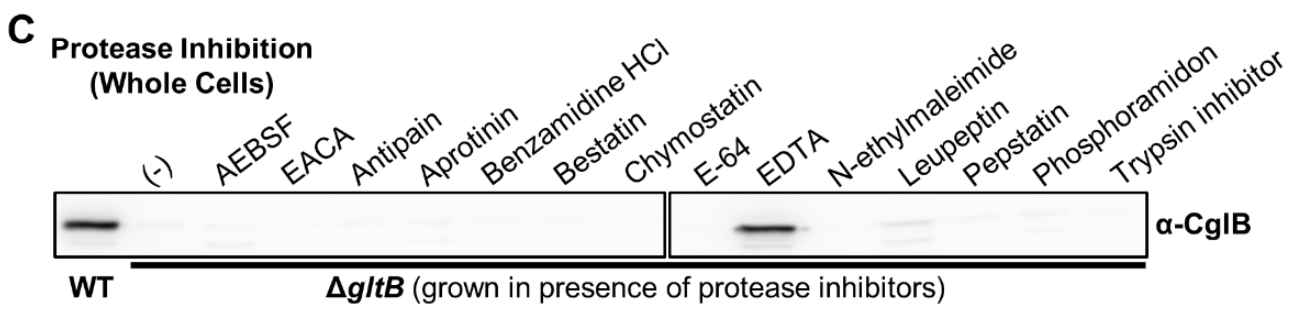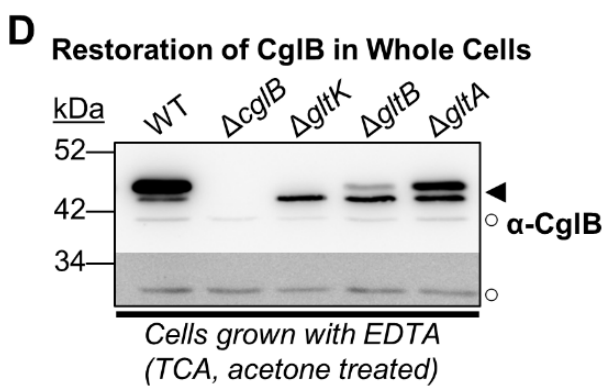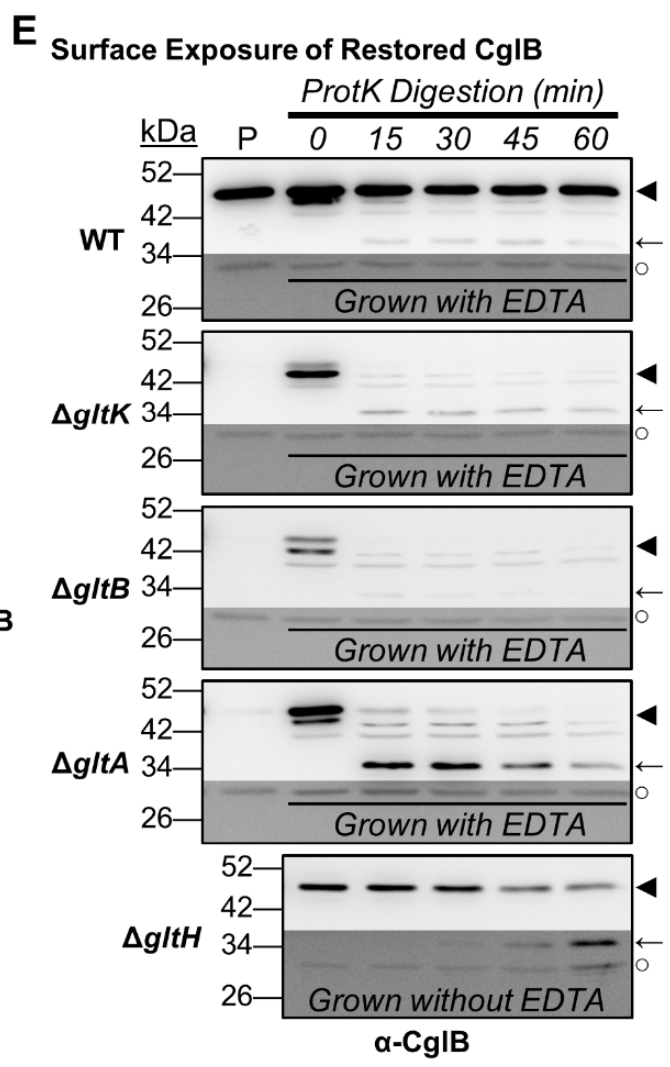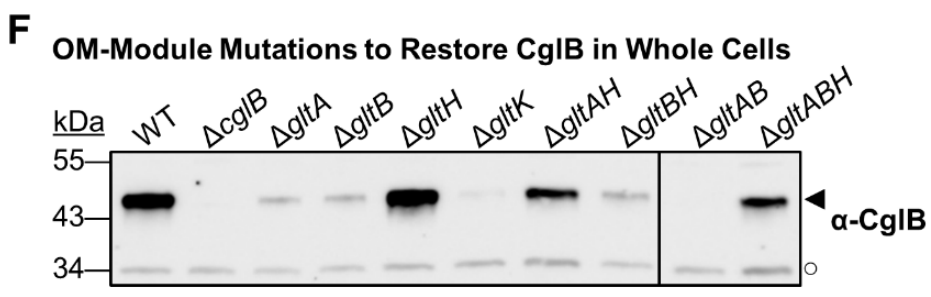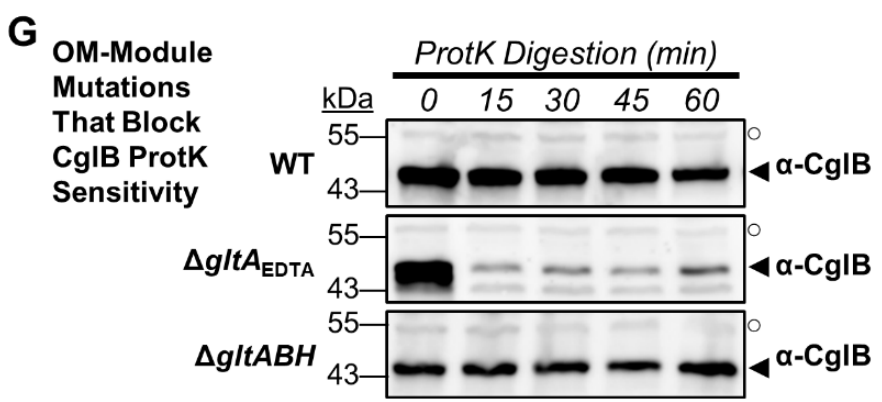

848 **Figure 4: Role of GltK in CglB Function**

849 **A)**  $\alpha$ -GltK Western blot of WT whole-cell extracts treated with increasing concentrations of DTT  
850 to break disulphide bonds. Legend: ◀, full-length GltK; ○, loading control (non-specific protein  
851 band labelled by  $\alpha$ -GltK pAb). See also [Supplementary Fig. S2B](#).

852 **B)** Kymograph of  $\Delta$ *gltA* vs.  $\Delta$ *gltK* cells showing AglZ-YFP cluster position over time. Scale  
853 bar: 2  $\mu$ m. Legend: white arrowheads, AglZ-YFP clusters followed for their entire lifetime; black  
854 arrowheads, AglZ-YFP clusters followed for an incomplete lifetime. See also [Supplementary](#)  
855 [Fig. S4C](#).

856 **C)** Frequency of trafficking Agl–Glt complexes via TIRFM (of AglZ-YFP) on chitosan-coated  
857 glass surfaces in PDMS microfluidic chambers for WT (n = 37 cells) and  $\Delta$ *gltK* (n = 44 cells)  
858 strains. The distribution of the two datasets are significantly different (\*), as calculated via  
859 unpaired two-tailed Mann-Whitney U-test ( $p < 0.05$ ). See also [Supplementary Fig. S4C](#).

860 **D)** Stability of trafficking Agl–Glt complexes via TIRFM (of AglZ-YFP) on chitosan-coated  
861 glass surfaces in PDMS microfluidic chambers for WT (n = 90 clusters) and  $\Delta$ *gltK* (n = 223  
862 clusters) strains. The distribution of the two datasets are not significantly different, as calculated  
863 via unpaired two-tailed Mann-Whitney U-test ( $p > 0.05$ ). See also [Supplementary Fig. S4C](#).

864 **E)** Schematic of inter-strain mixes to study OME and the interplay between GltK and CglB.

865 **F)** Gliding motility restoration in mCherry<sup>+</sup> cells via *trans*-complementation following OME.  
866 Note that motile single cells, as well as gliding-dependent flares emanating from swarm fronts  
867 (which are dependent on collective effects of single-cell motility), are only observable when  
868 CglB is efficiently transferred (white arrows). Scale bar: 20  $\mu$ m.

869 **G)** *M. xanthus* cells from strain-mixing experiments to probe GltK-dependent CglB transfer via  
870 OME. *Left panel*: Fluorescence profile of the total cell population after 6 h of cell mixing on an  
871 agar substratum, as determined via flow cytometry. *Right panel*: FACS analysis of the mCherry<sup>+</sup>  
872 cell population after sorting.

873 **H)** Western immunoblot to detect the presence of CglB and mCherry following OME via various  
874 strain–strain mixes. Legend: ◀, full-length protein; ○, loading control (non-specific protein band  
875 labelled by respective pAb).



# FIGURE 4

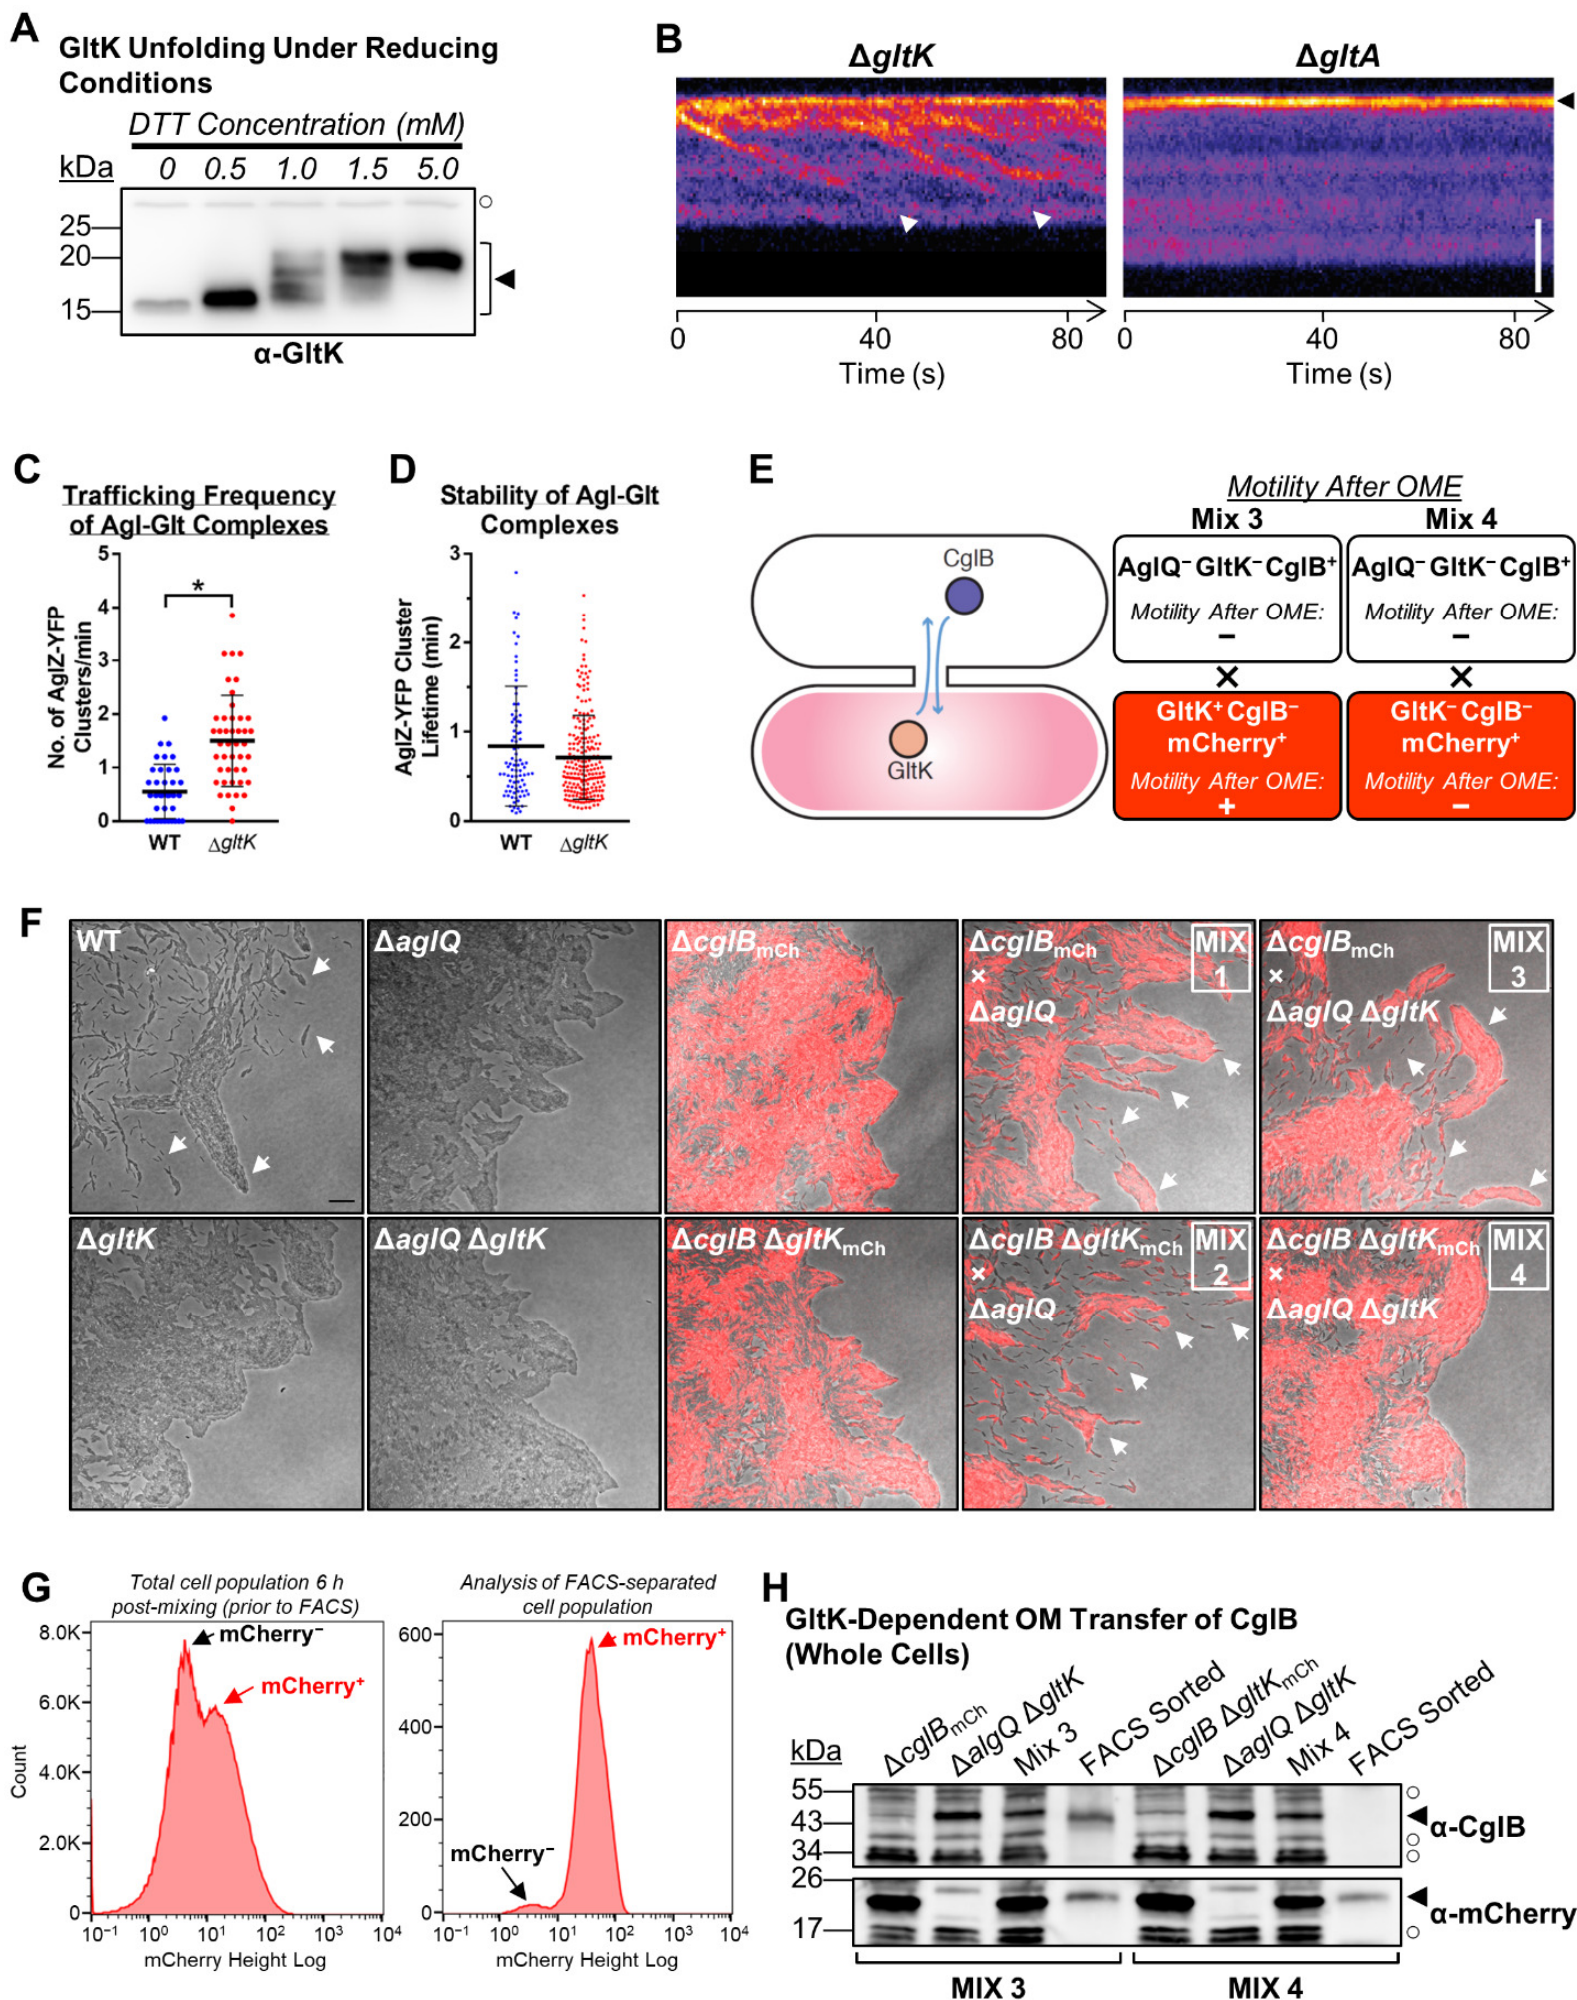

877 **Figure 5: Proposed Model for Agl–Glt Complex Substratum-Tethering by CglB at bFAs.**  
878 *Step 1:* At bFAs, the PMF-driven (*red dots*) mechanical action of the IM motor complex allows  
879 dynamic interactions of the IM complex with the OM platform via flexible protein periplasmic  
880 domains. *Step 2:* These domains promote localized CglB activation via GltK and secretion of  
881 CglB across the OM, requiring the OM-platform structure. CglB then interacts with the  
882 underlying substratum via its integrin-like domain, thus mediating force transduction at bFAs.  
883 *Step 3:* After the power stroke of the IM machinery, the “used” OM platform is displaced.  
884 Adhesin turnover must occur to allow the motility complex to engage new CglB-loaded OM  
885 platform complexes and mediate forward propulsion. The exact turnover mechanism remains to  
886 be identified and could involve action of a surface metalloprotease to release CglB from the OM  
887 platform. *Step 4:* Displacement of the “used” OM platform, coupled with release of the “used”  
888 adhesin, promotes forward propulsion of the cell body, while the IM complex remains spatially  
889 fixed relative to the substratum. The IM complex subsequently recruits the adjacent inactive  
890 CglB-loaded OM platform and brings it in register. *Step 5:* This again locally activates a new  
891 CglB secretion and processing cycle. This creates an OM-platform adhesin flow at bFAs,  
892 propelling the cell forward. For simplicity a single Agl–Glt complex is shown at a bFA, but it is  
893 possible that bFAs are formed by several co-localized complexes that act in concert.  
894

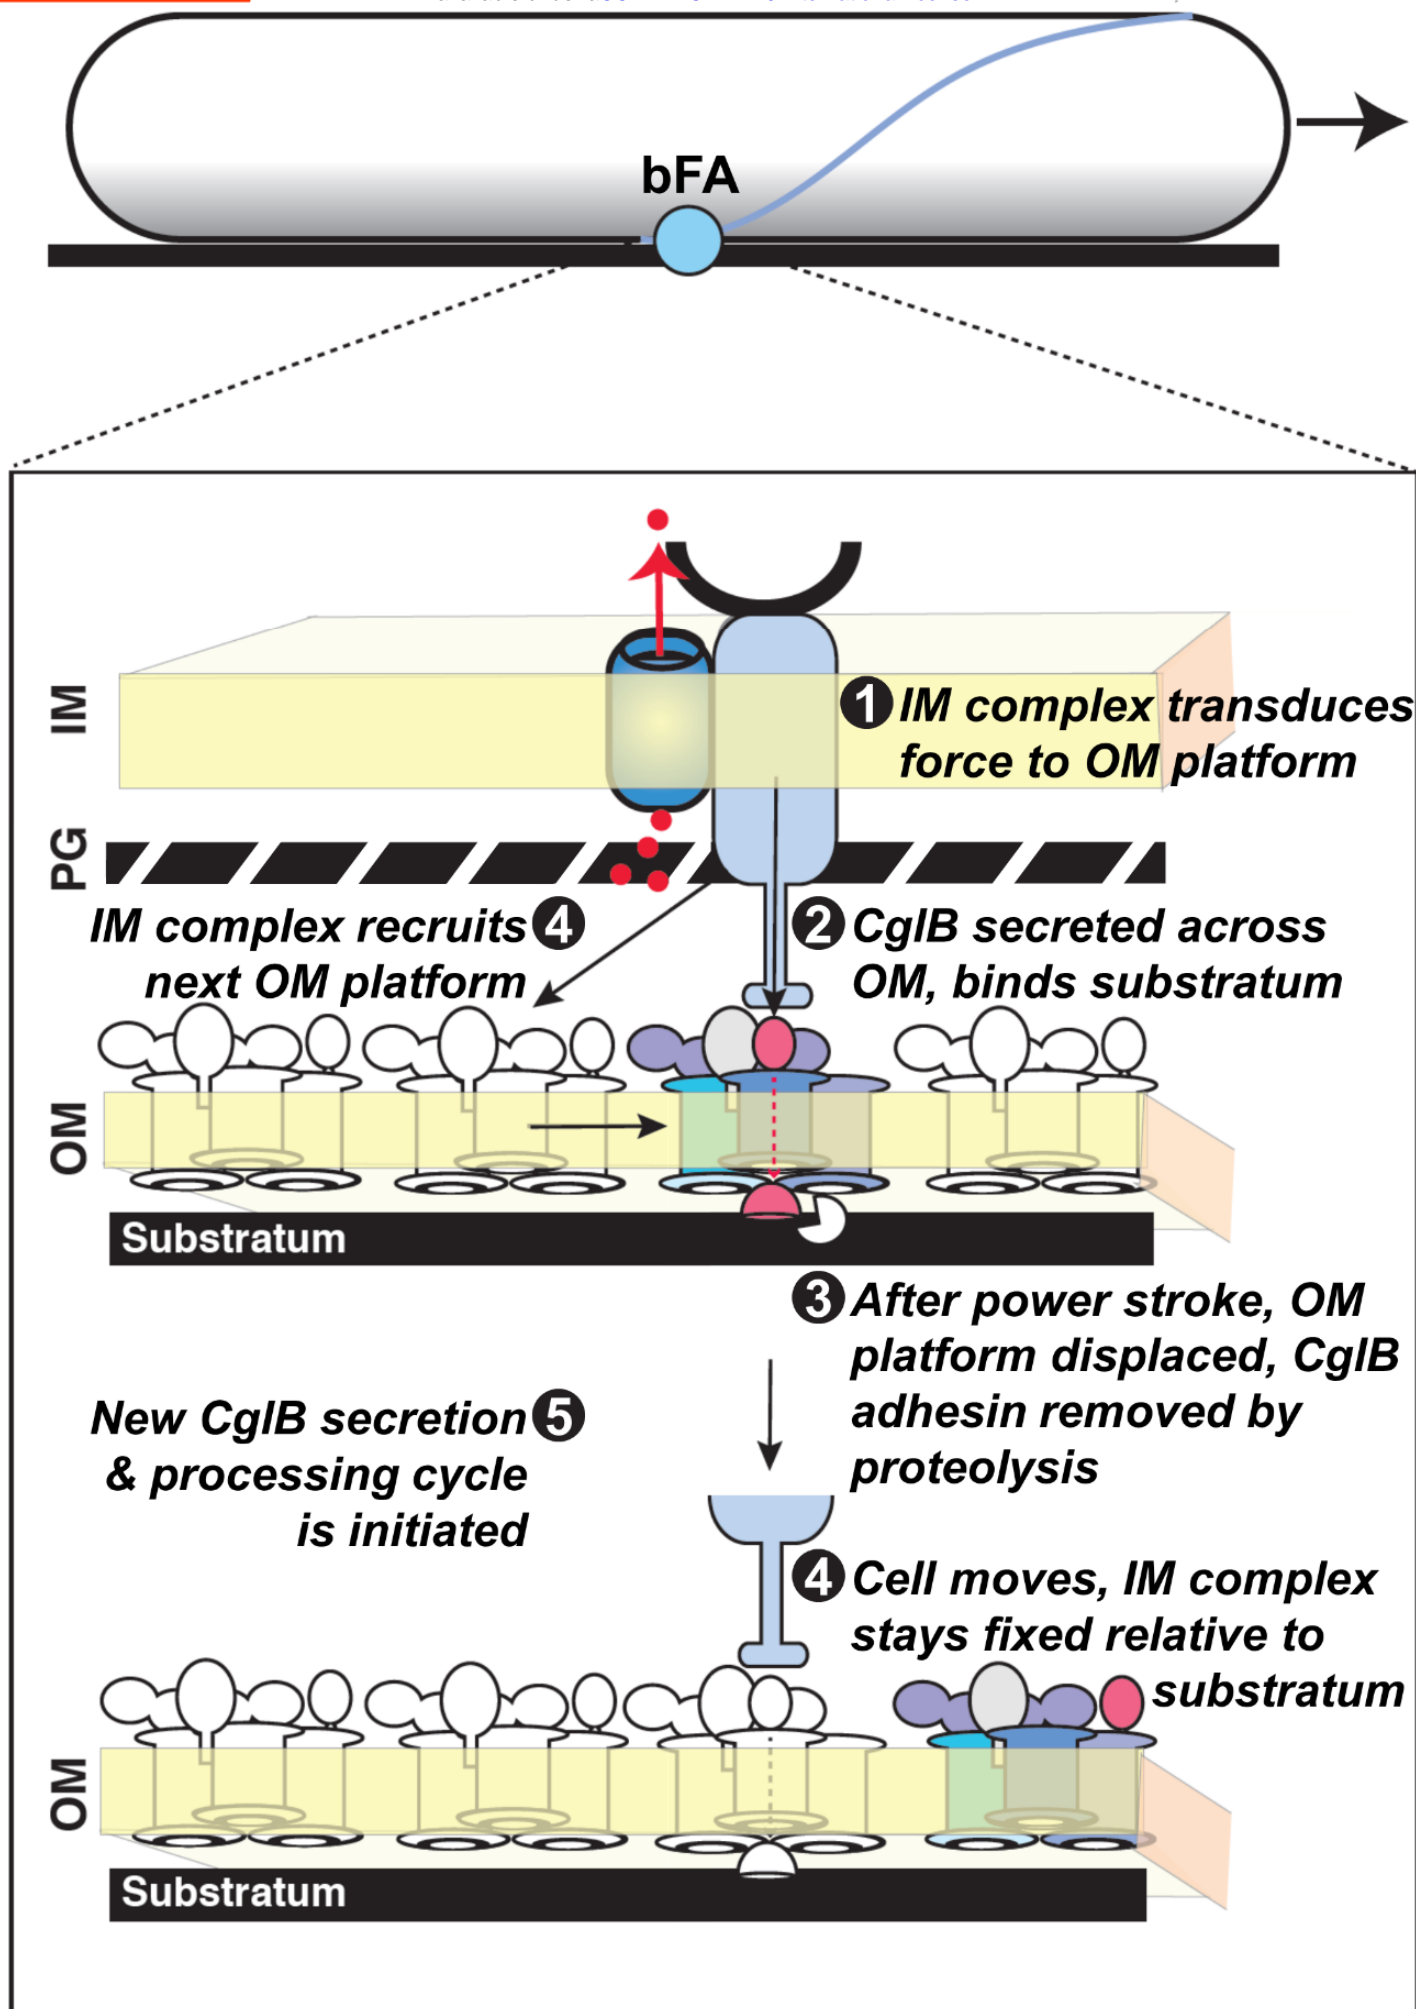



896 **METHODS:**

897 ***Bacterial Cell Culture and Phenotypic Analysis***

898 *M. xanthus* strains were cultured in CYE (10% w/v Bacto Casitone peptone, 5% w/v  
899 yeast extract, 1% w/v MgCl<sub>2</sub>, 10 mM MOPS [pH 7.4]) broth with shaking (220 rpm), or on CYE  
900 solidified with 1.5% agar, at 32 °C. To examine the effects of protease inhibition on CglB  
901 liberation, cells were grown in the presence of individual protease inhibitor panel constituents  
902 (Sigma, Cat.# INHIB1) at the recommended concentration: 4-(2-Aminoethyl benzenesulfonyl  
903 fluoride HCl (AEBSF) (1 mM), ε-aminocaproic acid (EACA) (5 mg/mL), antipain HCl (100  
904 μM), aprotinin (300 nM), benzamidine HCl hydrate (2 mM), bestatin HCl (40 μM), chymostatin  
905 (50 μg/mL), E-64 (10 μM), ethylenediaminetetraacetic acid disodium dihydrate (EDTA) (1  
906 mM), N-ethylmaleimide (500 μM), leupeptin hemisulfate (75 μM), pepstatin A (1 μM),  
907 phosphoramidon disodium salt (10 μM), and soybean trypsin inhibitor (1 μM). Cell  
908 resuspensions were done in TPM buffer (10 mM Tris-HCl, pH 7.6, 8 mM MgSO<sub>4</sub>, and 1 mM  
909 KH<sub>2</sub>PO<sub>4</sub>). For OME tests, strains were grown to exponential phase in 20 mL CYE, then  
910 resuspended in TPM buffer to an OD<sub>600</sub> of 5.0. For strain-mixing experiments, cell  
911 resuspensions were mixed together at a 1:1 ratio. Samples were then spotted (10 μL) on a CTT  
912 1.5% agar plate and incubated (32 °C, 48 h) prior to microscopy analysis and/or harvest. All  
913 strains and plasmids used are listed in **Supplementary Table S1**.

914

915 ***Polymertropism Testing***

916 Aspect ratio (AR) vs. time experiments and analyses were adapted from previous work<sup>21</sup>  
917 and were conducted as described previously<sup>19</sup>. Briefly, *M. xanthus* cells were grown in CYE  
918 broth at 28 °C to approximately  $5 \times 10^8$  cells/mL, then sedimented ( $4000 \times g$ , 10 min), followed  
919 by resuspension in CYE broth to a final concentration of  $5 \times 10^9$  cells/mL and inoculation (4 μL)  
920 of compressed and uncompressed square CYE agar plates. Agar in compressed plates was  
921 squeezed against the plate wall and held in position by the insertion of a length of 5.56 mm outer  
922 diameter Tygon tubing<sup>21</sup>. Plates were incubated at 30 °C and the colony perimeters marked after  
923 24, 48, 72, 96, and 120 h. Upon experiment completion, the AR of each swarm at each time  
924 point was calculated by dividing the colony width by the colony height such that an elongated  
925 swarm produced an AR greater than one, while a round swarm produced an AR near-or-equal to  
926 one. Linear best-fit lines were plotted for each replicate dataset, followed by slope (AR/time)

927 determination. Slope values were averaged for each strain, then normalized as a percentage of  
928 the AR/time for the WT strain.

929

### 930 ***DNA Manipulations***

931 The upstream region of *cglB* (from -213 bp), including a promoter region (from -190 bp  
932 to -141 bp) predicted by BDGP<sup>55</sup>, as well as *cglB* itself was amplified via PCR using Q5 high-  
933 fidelity DNA polymerase, followed by digestion of the product and plasmid pSWU30 with  
934 HindIII-HF (5') and SacI-HF (3'), then ligation via T4 DNA ligase (all enzymes from NEB) to  
935 yield pCglB<sub>WT</sub>. Oligonucleotide primers for QuikChange site-directed mutagenesis were  
936 generated using PrimerX (<http://bioinformatics.org/primerx/>). Sequencing results were analyzed  
937 by Sequencher and/or ApE software.

938

### 939 ***Generation of $\alpha$ -CglB polyclonal antibodies***

940 CglB (lacking signal peptide) elaborating a C-terminal hexa-histidine tag (CglB<sub>21-416</sub>-  
941 His<sub>6</sub>) was purified under denaturing conditions. Fractions were collected in 50 mM Tris pH 8.0,  
942 300 mM NaCl, 250 mM imidazole, 6 M urea and used to immunize rabbits (Eurogentec, 28-day  
943 speedy protocol). The  $\alpha$ -CglB 1<sup>o</sup> pAb produced was then tested for specificity by using the wild-  
944 type and the  $\Omega$ *cglB* strains. The  $\alpha$ -GltA,  $\alpha$ -GltB, and  $\alpha$ -GltH 1<sup>o</sup> pAb were raised previously<sup>4,13</sup>.

945

### 946 ***Phylogeny and gene co-occurrence***

947 This study explored 27 myxobacterial genomes, distributed within 3 suborders and 10  
948 families<sup>56-69</sup>, in addition to 58 outgroup genomes (members from 32 non-Myxococcales  
949 Deltaproteobacteria, 4  $\alpha$ -, 6  $\beta$ -, 9  $\gamma$ -, 4  $\epsilon$ -proteobacteria, 2 Firmicutes, and 1 Actinobacteria).  
950 Highly-conserved gapless concatenated alignment of 25 housekeeping protein sequences<sup>66,70</sup> was  
951 subjected to RAxML to build a maximum likelihood phylogenetic tree using JTT Substitution  
952 Matrix and 100 bootstrap values<sup>71</sup>. Sequential distribution of gliding motility genes, i.e. *agl*, *glt*  
953 (M1, G1 and G2 clusters)<sup>4</sup> and *cglB*<sup>15,72,73</sup> was identified within all 85 genomes under study  
954 using two iterations of homology searching via JackHMMER (HMMER 3.1b1 [May 2013])<sup>74</sup>  
955 with an E-value cut-off of 1e<sup>-5</sup>, query coverage of 35%, and 35% sequence similarity. The  
956 relative distribution of gliding motility proteins was mapped to the multi-protein phylogeny  
957 using iTol v3<sup>75</sup>. The strip right to the phylogeny depicts the taxonomic classes (from top to

958 bottom: Myxococcales, non-Myxococcales  $\delta$ -proteobacteria,  $\alpha$ -,  $\beta$ -,  $\gamma$ -proteobacteria, and  
959 fibrobacteres respectively).

960

### 961 ***Tertiary structure homology detection & modelling***

962 Pair-wise alignments were performed with EMBOSS Needle software<sup>76</sup>. Protein  
963 secondary structure was analyzed via Jpred4<sup>77</sup>, with domain detection performed using  
964 SMART<sup>78</sup>. Preliminary identification of structural homologues to CglB, GltK, GltB, GltA, and  
965 GltH was carried out using fold-recognition searches of the Protein Data Bank using HHpred<sup>79</sup>  
966 and RaptorX<sup>80</sup>. To improve template–target alignments, outputs were manually curated in  
967 MODalign<sup>81</sup> to minimize breaks in predicted target secondary structure motifs. Curated  
968 alignments to well-matched templates were then input into MODELLER<sup>82</sup> to generate a 3°  
969 structure homology model.

970 CMView<sup>83</sup> was used to identify intra-protein contacts between C $\alpha$  positions within model  
971 structures with a minimum sequence separation of 10 amino acids. Evolutionarily-coupled  
972 amino acid positions within proteins were identified using CoinFold<sup>84</sup>, with the highest-  
973 stringency *L* (length of the protein) number of coupled residues extracted. Positions of coupled  
974 amino acids as well as intra-protein contacts were individually plotted in GraphPad Prism v.6,  
975 followed by tricolour overlay using ImageJ to identify overlapping positions and colour  
976 swapping in Photoshop (Adobe) to improve clarity.

977

### 978 ***SDS-PAGE, in-gel fluorescence, and Western immunoblotting***

979 For detection of proteins from whole cells via Western immunoblot, TPM-washed cells  
980 were sedimented and resuspended at OD<sub>600</sub> 1.0 in 1× Laemmli sample buffer containing 5%  $\beta$ -  
981 mercaptoethanol for reducing SDS-PAGE (unless otherwise indicated). Samples were boiled (10  
982 min), loaded (20  $\mu$ L) on 10-well 1 mm-thick gels, then resolved on 10% acrylamide gels (80 V  
983 for 45 min for stacking, 120 V for 75 min for resolving), then electroblotted (100 V for 60 min)  
984 to nitrocellulose membranes. Blots were rinsed with Tris-buffered saline (TBS) buffer, blocked  
985 for 30 min at room temperature with 5% milk in TBS, then incubated rocking overnight in the 4  
986 °C cold room in 1:10 000  $\alpha$ -CglB, or 1:3000  $\alpha$ -GltH, or 1:1000  $\alpha$ -mCherry pAb mixture in TBS  
987 with 0.05% Tween-20 (TBS-T). The next day, blots were rinsed twice (5 min) with TBS-T,  
988 incubated with goat  $\alpha$ -rabbit 2° antibody conjugated to HRP (1:5000) (Bio-Rad) in TBS-T at

989 room temperature (1 h), then rinsed twice (5 min) again with TBS-T. For all detections using  $\alpha$ -  
990 GltA (1:5000) and  $\alpha$ -GltB (1:5000) pAb, identical processing steps were followed, but using  
991 PBS-based buffers (instead of TBS). All immunoblots were developed using the SuperSignal  
992 West Pico (Thermo) chemiluminescence substrate, captured on either a GE Imager with  
993 ImageQuant software or an Amersham Imager 600 machine.

994 For fractionated whole cell–supernatant–OMV samples in  $1\times$  Laemmli buffer, samples  
995 were boiled (10 min) and loaded (20  $\mu$ L) on 15-well 4–20 % acrylamide precast gradient gels  
996 (Biorad). Supernatant-alone samples were similarly boiled and loaded on a cast 10% acrylamide  
997 gel. Gels were resolved at 120 V, followed by electroblotting to nitrocellulose membranes at  
998 100 V. Immunodetection was performed with diluted polyclonal antisera as follows:  $\alpha$ -CglB  
999 (1:10 000),  $\alpha$ -MglA (1:5000), and  $\alpha$ -GltK (1:5000). Detection via secondary antibody was done  
1000 with goat  $\alpha$ -rabbit mAb (1:5000) conjugated to HRP (Biorad). Immunoblots were developed  
1001 using the SuperSignal West Femto (Thermo) chemiluminescence substrate, captured on GE  
1002 Imager with ImageQuant software.

1003 For analysis of AglZ-YFP in-gel fluorescence, TPM-washed cells were resuspended in  
1004  $1\times$  non-reducing Laemmli sample buffer to an OD<sub>600</sub> of 4.0. Cell resuspensions were heated for  
1005 30 min (65 °C), loaded (20  $\mu$ L) on an 8% SDS-PAGE gel, and resolved for 45 min at 80 V, then  
1006 75 min at 120 V. Cultures, cell resuspensions, and SDS-PAGE gels (before, during, and after  
1007 resolution) were all shielded from ambient light to reduce photobleaching of the YFP moiety.  
1008 Resolved gels were scanned on a Typhoon FLA9500 flat-bed imager (GE Healthcare). AglZ-  
1009 YFP was excited with a 473 nm laser, with fluorescence captured using the BPB1 filter (PMT  
1010 800). Pre-stained protein ladder bands were detected via excitation with a 635 nm laser and  
1011 capture using the LPR filter (PMT 800). Quantification of band fluorescence intensity was  
1012 performed using ImageJ via the “plot lanes” function, followed by determination of the area  
1013 under the curve. AglZ-YFP signal for each lane was normalized to the faster-migrating auto-  
1014 fluorescent band in the same lane; these values were then expressed as a percentage of the signal  
1015 in WT cells for a given biological replicate.

1016

### 1017 ***Sample Fractionation***

1018 To separate supernatant and outer-membrane vesicle (OMV) fractions, WT,  $\Delta$ *gltA*,  $\Delta$ *gltB*  
1019 and  $\Delta$ *gltK* vegetative cells were grown in CYE medium to OD<sub>600</sub> 0.7. Intact cells were first



1020 eliminated by sedimentation at 7830 rpm (10 min, RT). After addition of 1 mM PMSF,  
1021 supernatants were sedimented at  $125\,000 \times g$  (2 h, 4 °C). The resulting pellets (OMV fraction)  
1022 and supernatants (soluble fractions) were then treated separately. The OMV pellets were washed  
1023 with TPM, sedimented again at  $125\,000 \times g$  (2 h, 4 °C), and then resuspended directly in 500  $\mu$ L  
1024 1 $\times$  Laemmli protein sample buffer. The soluble supernatant fractions were treated with TCA (10  
1025 % final concentration) for 30 min on ice and then sedimented at 11 000 rpm (1 h, 4 °C). The  
1026 resulting pellets (precipitated proteins) were washed with 100% acetone, sedimented at 7830 rpm  
1027 (10 min, 4 °C), and dried overnight at RT. Dried pellets were then resuspended in 1.5 mL TPM,  
1028 sedimented at 15 000 rpm (30 min, 4 °C) and finally resuspended in 500  $\mu$ L 1 $\times$  Laemmli protein  
1029 sample buffer.

1030 For isolation of supernatant-alone samples, 50 mL CYE cultures (inoculated at OD<sub>600</sub>  
1031 0.02) were grown overnight with shaking (220 rpm, 32 °C) to OD<sub>600</sub> 0.2-0.3, sedimented ( $6000 \times$   
1032  $g$ , 15 min, 20 °C), followed by passage of supernatants through a 0.22  $\mu$ m syringe filter to  
1033 remove any intact cells and cell debris. Filtered supernatants were each spun through a Vivaspin  
1034 20 3-kDa cutoff column with polyethersulfone membrane ( $8000 \times g$ , 60 min, 22 °C, fixed-angle  
1035 rotor) to concentrate proteins contained therein to 1 mL final volume. Concentrated supernatants  
1036 were then sedimented in a tabletop ultracentrifuge (MLA130 rotor,  $120\,000 \times g$ , 1.25 h, 4 °C) to  
1037 remove any OMVs or cell debris left in the samples. Clarified 1 mL supernatant samples were  
1038 transferred to microfuge tubes and treated with 200  $\mu$ L 100% TCA to precipitate the proteins.  
1039 Tubes were heated at 65 °C for 5 min, then spun ( $16\,300 \times g$ , 20 min, RT) to sediment  
1040 precipitate. TCA-precipitated pellets were washed with 1 mL acetone, sedimented ( $16\,300 \times g$ ,  
1041 20 min, RT), followed by supernatant aspiration. Protein pellets were left uncapped in the  
1042 chemical hood overnight to ensure evaporation of acetone. Pellets were resuspended in 500  $\mu$ L  
1043 2 $\times$  Laemmli sample buffer lacking reducing agent, then diluted to 1 $\times$  with ddH<sub>2</sub>O.

1044

#### 1045 ***Immunoprecipitation & mass spectrometry***

1046 Cells of  $\Delta$ *gltB* from 100 mL CYE cultures were sedimented ( $4000 \times g$ , 24 °C, 15 min).  
1047 Supernatants were decanted, pooled, and passed through a 0.2  $\mu$ m syringe filter. Filtered  
1048 supernatant was then concentrated using four Vivaspin20 columns (10 kDa cutoff) (Sartorius),  
1049 spun at  $8000 \times g$  (20 °C) in a fixed-angle centrifuge, with the supernatant concentrated to the dead  
1050 volume limit of each column. Concentrated supernatants (~ 80  $\mu$ L each) were subsequently

1051 pooled, and diluted 1:2 with filter-sterilized 1× PBS (binding buffer) to equilibrate sample pH.  
1052 Separately, a single 1 mL Pierce Protein A column (Thermo) per each pooled supernatant was  
1053 equilibrated in filter-sterilized binding buffer at room temperature as per the manufacturer's  
1054 instructions. Filtered α-CglB antiserum (1 mL) was sedimented in a microfuge to remove remnant  
1055 cells and/or debris (4000 × g, 5 min), diluted 1:1 with binding buffer, then sedimented at 12 000 ×  
1056 g to clarify the sample as binding buffer addition may have resulted in lipoprotein precipitation.  
1057 The Protein A column was primed by passage of 5 mL binding buffer. To bind antibody to the  
1058 column, the 2 mL of diluted antiserum was added to the top of the column and allowed to drip  
1059 through, followed by washing with 15 mL of binding buffer to remove unbound pAb. The ~ 960  
1060 μL of supernatant concentrate was added to the top of the column and allowed to distribute  
1061 throughout the resin bed at room temperature (60 min). The column was then again washed with  
1062 15 mL binding buffer. To elute bound pAb (and any associated proteins) from the column, 5 mL  
1063 of elution buffer (0.1 M glycine, pH to 2.5 with HCl) was added.

1064 To analyze the protein content of the pull-down, 500 μL of column eluate was concentrated  
1065 in a microfuge using a Vivaspin500 column (10 kDa cutoff) to a dead volume of ~20 μL, then  
1066 diluted 1:1 with 2× reducing Laemmli sample buffer. Samples (20 μL) were run into the stacking  
1067 gel via SDS-PAGE (80 V, 13 min). Gel bands stained with SimplyBlue Safestain were excised  
1068 from the stacking portion of the gel and the proteins digested by trypsin or Endoproteinase Glu-C.  
1069 Liquid chromatography coupled to tandem mass spectrometry (LC-MS/MS) analyses were  
1070 performed on a Q-Exactive plus mass spectrometer (ThermoFisher Scientific) by staff at the  
1071 Proteomics Platform of the Mediterranean Institute of Microbiology (Marseille). Processing of  
1072 the spectra for protein identification was performed with PROTEOME DISCOVERER software  
1073 (Thermo Scientific, versions 1.4.0.288 and 2.1.0.81).

1074

### 1075 ***Proteinase K surface digestion***

1076 Cells were resuspended in TPM at OD<sub>600</sub> 2.0, followed by addition of 200 μg/mL  
1077 Proteinase K and a brief vortex pulse to mix. An aliquot (50 μL) was immediately removed at t  
1078 = 0 and placed into a tube containing 5 μL of 100% trichloroacetic acid (TCA). Digestion  
1079 mixtures were incubated at room temperature on a rocker platform, with aliquots removed every  
1080 15 min and placed into respective pre-aliquoted tubes of TCA. Upon removal of digestion  
1081 reaction aliquots, TCA-containing sample tubes were heated at 65 °C for 5 min, chilled on ice,

1082 then sedimented at  $14\ 000 \times g$  (5 min). Following supernatant removal, precipitated protein  
1083 pellets were washed via resuspension in 500  $\mu\text{L}$  of 100% acetone. Samples were then  
1084 sedimented as before ( $14\ 000 \times g$ , 5 min), followed by careful aspiration of the supernatants.  
1085 Tubes were left uncapped overnight in the fume hood to promote evaporation of residual  
1086 acetone, followed by storage at  $-80\ ^\circ\text{C}$  until needed. Precipitated protein pellets were  
1087 resuspended in 50  $\mu\text{L}$   $1\times$  Laemmli sample buffer (with reducing agent as indicated) and analyzed  
1088 via SDS-PAGE and Western immunoblot.

1089

### 1090 *Motility and fluorescence analysis*

1091 For phase-contrast and fluorescence-microscopy on agar pads, cells from exponentially-  
1092 growing cultures were sedimented and resuspended in TPM buffer to  $\text{OD}_{600}$  5.0, spotted (5  $\mu\text{L}$ )  
1093 on a glass coverslip, then overlaid with a pad of 1.5% agar prepared with TPM. For motility  
1094 analysis, cells were left to adhere for 5 min prior to imaging at  $32\ ^\circ\text{C}$  using a TE2000-E-PFS  
1095 microscope (Nikon) with a  $40\times$  objective and a CoolSNAP HQ2 camera (Photometrics) with  
1096 Metamorph software (Molecular Devices). AglZ-YFP fluorescence was imaged using a  
1097 monolithic aluminum microscope (homemade) equipped with a 1.49 NA/100X objective (Nikon  
1098 Instruments) and imaged on an iXon DU 897 EMCCD camera (Andor Technology). Illumination  
1099 was provided by a 488 nm DPSS laser (Vortran Stradus), and sample positioning was performed  
1100 using a P611 three-axis nanopositioner (Physik Instrument). Instrument control was programmed  
1101 in LabView (National Instruments) providing integrated control of all components. Cell gliding  
1102 speeds were calculated using the MicrobeJ module for FIJI<sup>85</sup>. Gliding cell montages were  
1103 generated using FIJI. Kymograph panels were generated using the FIJI Kymograph Builder  
1104 function. AglZ-YFP clusters were detected manually and tracked with the MTrackJ FIJI plugin.  
1105 Using an R software script, the points of the AglZ-YFP cluster trajectories ( $x_0, x_1, \dots, x_n; y_0,$   
1106  $y_1, \dots, y_n$ ) were used to calculate the mean square displacement (MSD) at time

$$1107 \quad t = d^2_t = (x_t - x_0)^2 + (y_t - y_0)^2: \quad \text{MSD}(t) = \frac{1}{t} \sum_0^t d_t^2$$

1108

1109 For total internal reflection fluorescence microscopy (TIRFM), imaging of real-time  
1110 AglZ-YFP trafficking was performed as previously detailed in chitosan-coated  
1111 polydimethylsiloxane (PDMS) microfluidic channels<sup>8</sup>. In brief, cells were injected into the  
1112 chamber and left to adhere (30 min) without flow, with unadhered cells then removed via manual

1113 injection with TPM. TIRFM was performed on attached cells with active autofocus using an  
1114 inverted microscope with 100× oil-immersion Plan-Achromat objective, atop a closed-loop  
1115 piezoelectric stage. AglZ-YFP was excited with a 488-nm laser, with emission collected by the  
1116 objective, through a dichroic mirror and bandpass filters, and captured by an emCCD camera.  
1117 For imaging of the YFP channel in real time, 500 images were captured at 20 Hz<sup>8</sup>.

1118

### 1119 ***Flow chamber construction and bead assay***

1120 Prior to experiments, 1 mL of *M. xanthus* DZ2 WT+AglZ-YFP and mutant DZ2  
1121  $\Delta cglB$ +AglZ-YFP overnight culture was grown to OD<sub>600</sub> ~0.6, sedimented (8000 rpm, 5 min),  
1122 and resuspended in 400 mL TPM buffer. Flow chambers were made by combining two layers of  
1123 double sided tape, a 1 mm-thick glass microscope slide, and a 100 μm-thick glass cover slip  
1124 (#1.5) as previously described<sup>86</sup>. The tape was separated to allow a final volume of  
1125 approximately 60 μL. Agarose (40 μL at 0.7%) dissolved in 6 M DMSO was injected into the  
1126 chamber and allowed to sit at room temperature for 15 min. The chamber was washed with 400  
1127 μL TPM then injected with *M. xanthus* cells (60 μL) and left at room temperature to facilitate  
1128 cell attachment to the agarose-coated surface for 30 min. Unattached cells were then thoroughly  
1129 washed away with a total of 2 mL TPM media containing 10 mM glucose. The flow chamber  
1130 was then mounted onto the microscope for imaging. For bead experiments, 1 μL of uncoated  
1131 polystyrene beads (diameter 520 nm) (Bangs Laboratories) were washed and diluted in 1 mL  
1132 TPM containing 10 mM glucose and injected into the flow chamber. Beads were optically  
1133 trapped and placed about a third of the cell length away from the pole of the immobilized cell of  
1134 interest.

1135

### 1136 ***Bead tracking and video analysis***

1137 For a chosen *M. xanthus* cell (WT or mutant), 3-min movies were recorded and analyzed  
1138 using a custom MATLAB tracking code. The code uses filtering mechanisms to subtract the  
1139 image background from that of the cell-attached bead. Firstly, an internal MATLAB centroid  
1140 function identified the  $x,y$  pixel values of the centre of the bead for each frame in the video,  
1141 followed by pixel value conversion to microns. This was then used to compute motor-driven  
1142 bead runs and velocities for each cell. The threshold value for a run was previously determined  
1143 by disabling molecular motors and decreasing bead motion in WT cells by carefully injecting 20

1144  $\mu\text{M}$  of nigericin, a pH-gradient/proton motive force-inhibitory drug, into the mounted flow  
1145 chamber. This drug concentration decreased bead velocity but not motor force production  
1146 translated to the beads. In these previous experiments, 40  $\mu\text{M}$  nigericin was used, leading to  
1147 negligible bead motion<sup>12</sup>.

1148

### 1149 *Flow cytometry*

1150 Analysis of the presence of CglB in mCherry<sup>+</sup> cells within a mixed population was  
1151 performed with strains TM1380 (or TM1290) and TM1365, positive and negative for the  
1152 mCherry marker, respectively. Fluorescence-activated cell sorting (FACS) was performed with  
1153 a Bio-Rad S3E cell sorter. The blue laser (488 nm, 100 mW) was used for forward (FSC) and  
1154 side scatter (SSC) signals and the green laser (561 nm, 100 mW) for excitation of mCherry.  
1155 Signals were collected using the emission filter FL3 (615/25 nm). Bacterial samples in TPM  
1156 buffer (maximum optical density of 0.1) were run in the low-pressure mode at  $\sim 10,000$  particles  
1157 per second. The threshold on FSC was 0.15% and the voltages of the photomultipliers were 403,  
1158 299 and 722 volts for FSC, SSC and FL3, respectively. The density plots obtained (small angle  
1159 scattering FSC versus wide angle scattering SSC signal) were gated on the population of interest  
1160 and filtered to remove multiple events. Populations of 300,000 – 500,000 events were used and  
1161 analyzed statistically using Prosort or FlowJo software. For sorting in “purity” mode, up to 60  
1162 million events were collected and at least ten tubes of 3.5 mL were used for sorting high-height  
1163 peak values of mCherry fluorescence. A total volume of 35 mL was collected and pooled,  
1164 followed by addition of 10% TCA to precipitate total protein content in the tube. Samples were  
1165 sedimented via ultracentrifuge ( $164\,700 \times g$ , 1 h, 4 °C), then the pellet was resuspended in 500  
1166  $\mu\text{L}$  of TPM, sedimented again ( $22\,065 \times g$ , 30 min, 4 °C), and later used for Western-blot  
1167 analysis.

1168 **SUPPLEMENTAL INFORMATION TITLES AND LEGENDS:**

1169 **Supplementary Figure S1: Defining the Structures of GltA, B, H, and CglB**

1170 **A)** GltA (i) tertiary structure homology model (based on the OprF  $\beta$ -barrel protein from  
1171 *Pseudomonas aeruginosa*), (ii) overlay of intra-protein amino acid contact positions from the  
1172 tertiary structure model (*black*) vs. evolutionarily-coupled amino acid positions from the primary  
1173 structure (*grey*) (with conserved positions between the two datasets indicated in *red*), (iii)  
1174 alignment with PDB 4RLC for MODELLER input.

1175 **B)** GltB (i) tertiary structure homology model (based on the OprF  $\beta$ -barrel protein from  
1176 *Pseudomonas aeruginosa*), (ii) overlay of intra-protein amino acid contact positions from the  
1177 tertiary structure model (*black*) vs. evolutionarily-coupled amino acid positions from the primary  
1178 structure (*grey*) (with conserved positions between the two datasets indicated in *red*), (iii)  
1179 alignment with PDB 4RLC for MODELLER input.

1180 **C)** GltH (i) tertiary structure homology model (based on the OmpA  $\beta$ -barrel protein from  
1181 *Shigella flexneri*), (ii) overlay of intra-protein amino acid contact positions from the tertiary  
1182 structure model (*black*) vs. evolutionarily-coupled amino acid positions from the primary  
1183 structure (*grey*) (with conserved positions between the two datasets indicated in *red*), (iii)  
1184 alignment with PDB 3NB3 for MODELLER input.

1185 **D)**  $\alpha$ -GltA and  $\alpha$ -GltB Western immunoblots from whole-cell extracts from different  $\Delta$ *glt*  
1186 mutants resolved via reducing SDS-PAGE.

1187 **E)** CglB (i) overlay of intra-protein amino acid contact positions from the tertiary structure  
1188 model (*black*) vs. evolutionarily-coupled amino acid positions from the primary structure (*grey*)  
1189 (with conserved positions between the two datasets indicated in *red*), (ii) alignment with PDB  
1190 3TXA for MODELLER input. See also Figure 2A. For the template alignments in figure panels  
1191 A, B, C, E: residue colouration is based on the conservation score as determined by Jalview:  
1192 maroon, 10 (out of 10); red, 9; orange, 8; yellow, 7. Conservation scores  $\leq 6$  have not been  
1193 displayed to enhance the clarity of the figure. Secondary structure properties for each protein are  
1194 indicated above/below the aligned sequence, based on the respective PDB entry and GltA/B/H/T  
1195 secondary structure prediction via JPred, with  $\beta$  strands (*green arrows*) indicated.



**A**

**(i)**

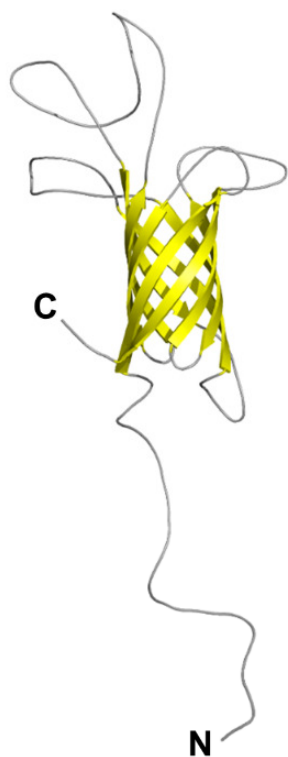

**(ii)**

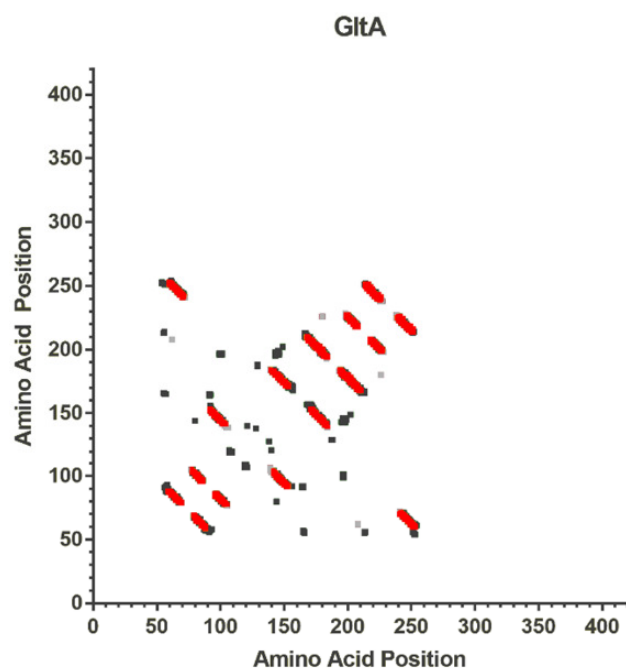

**(iii)**

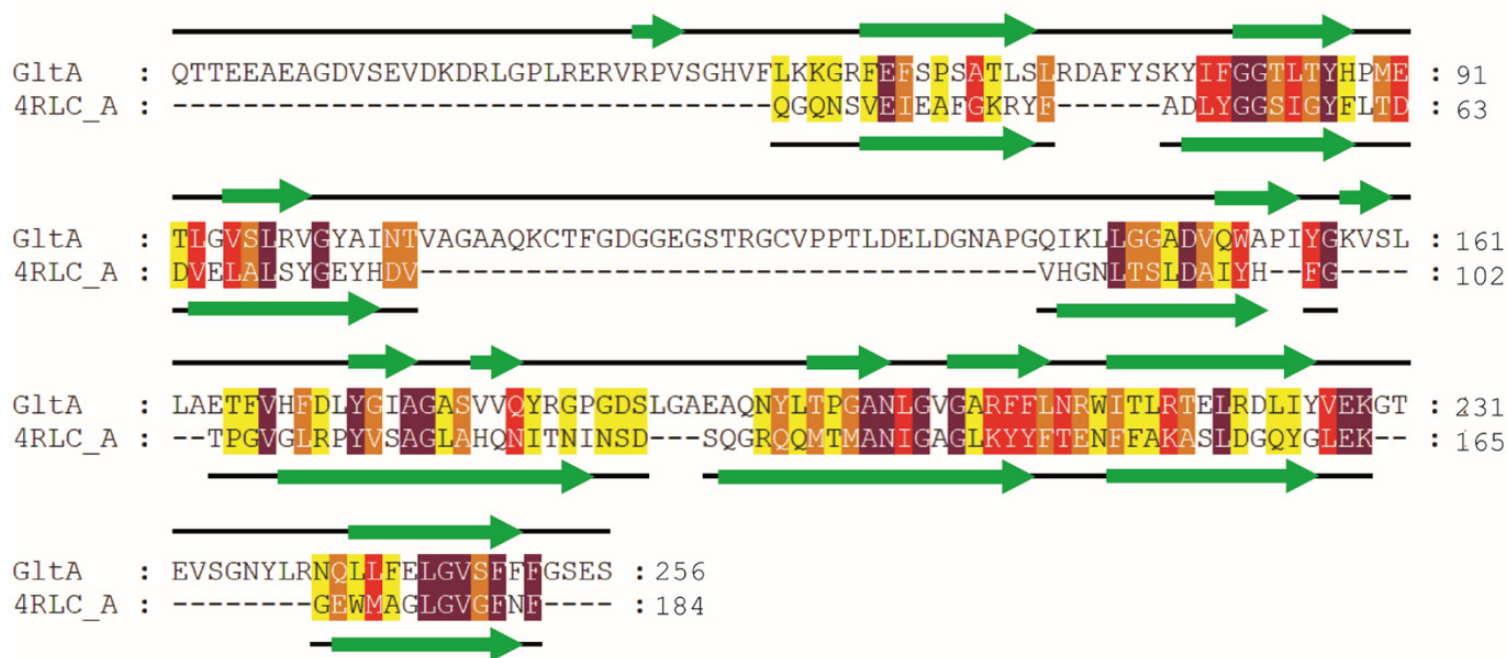



# SUPPLEMENTARY FIGURE S1

**B**

**(i)**

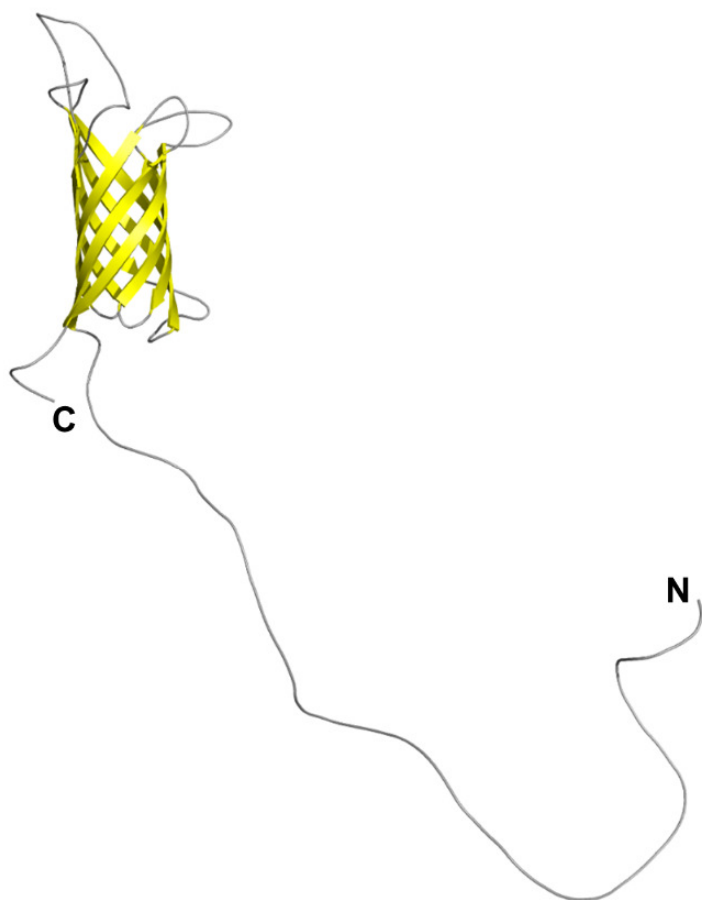

**(ii)**

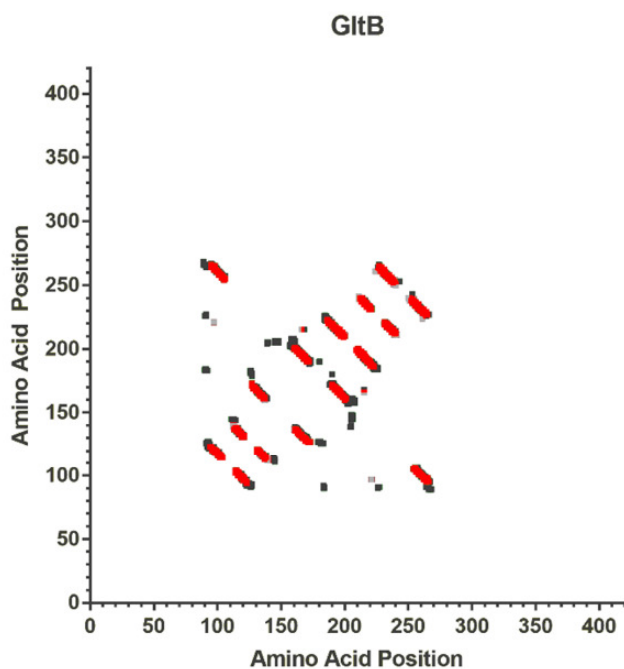

**(iii)**

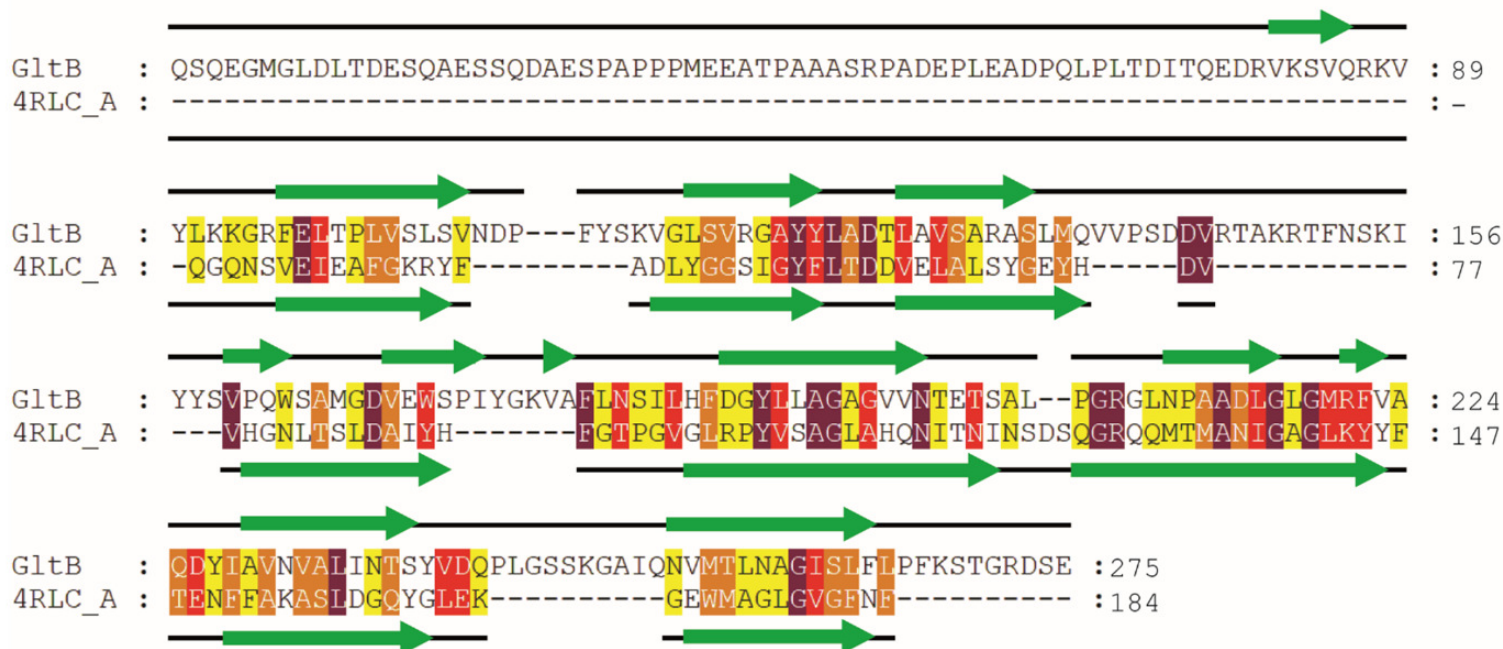

C

(i)

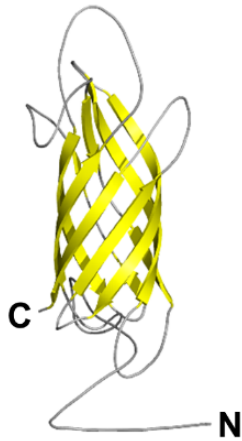

(ii)

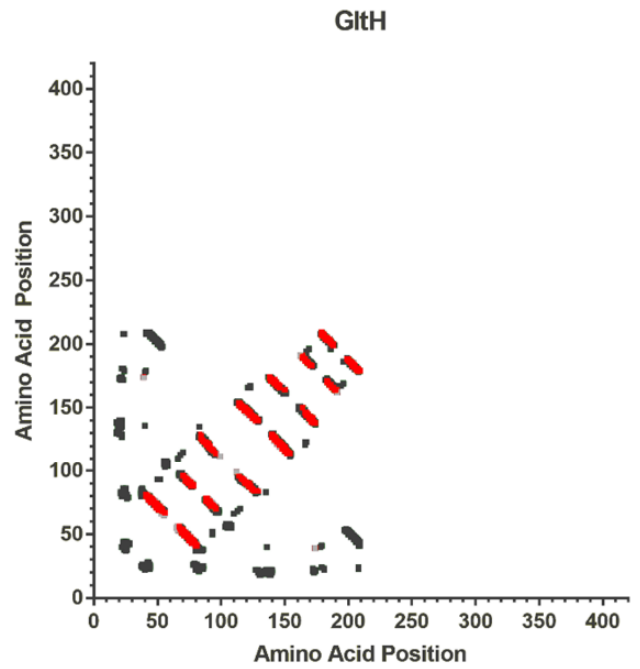

(iii)

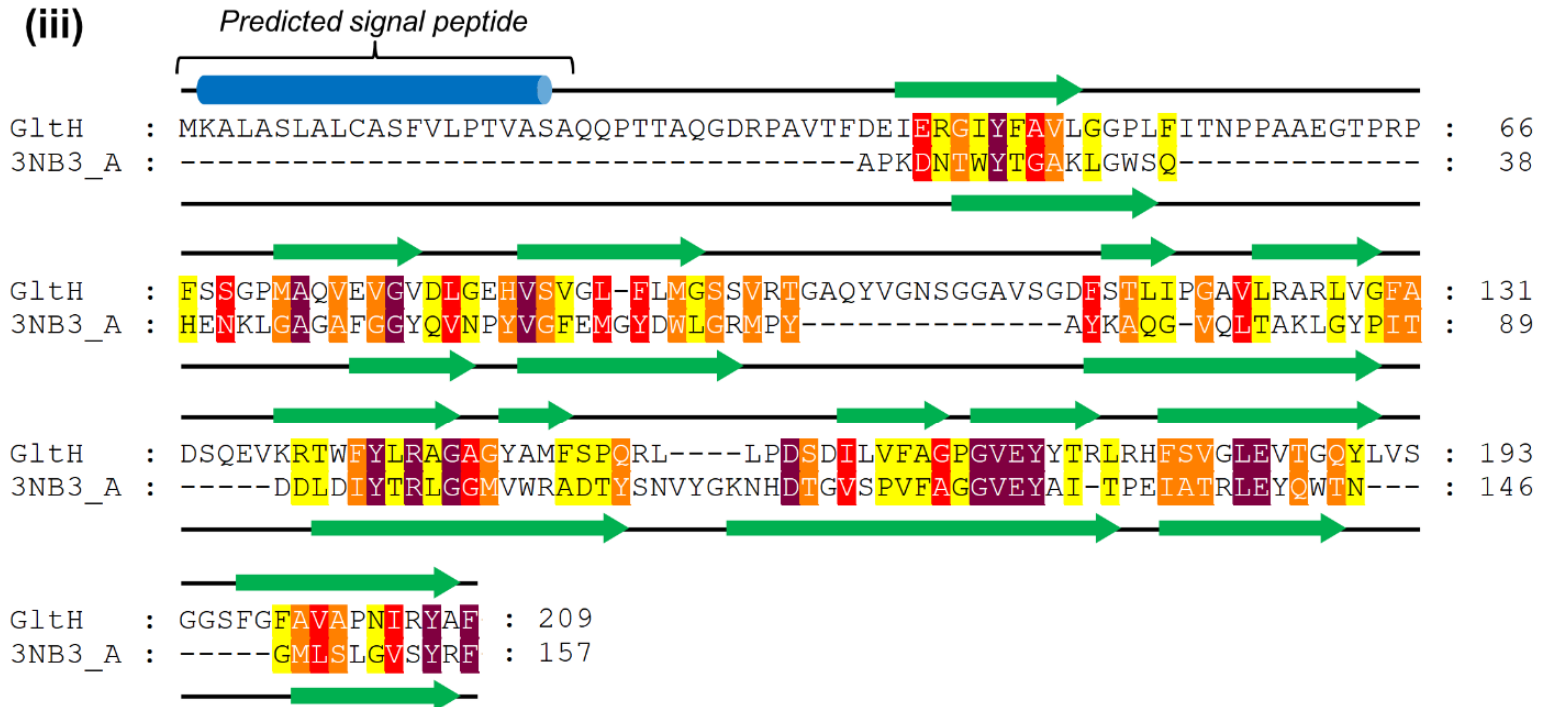

D

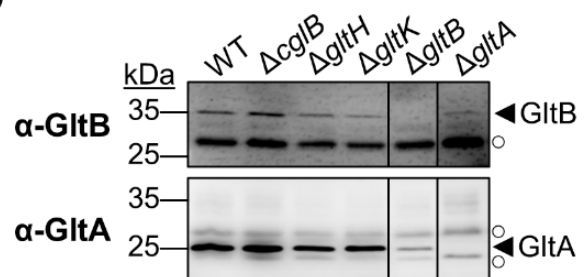

E

(i)

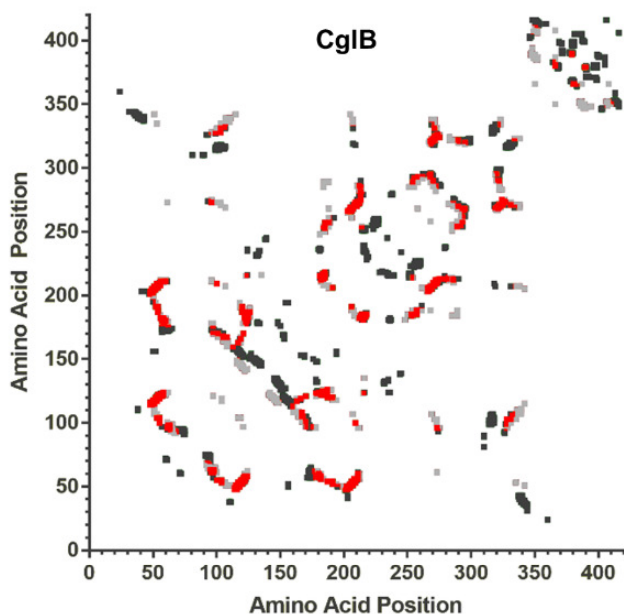

(ii)

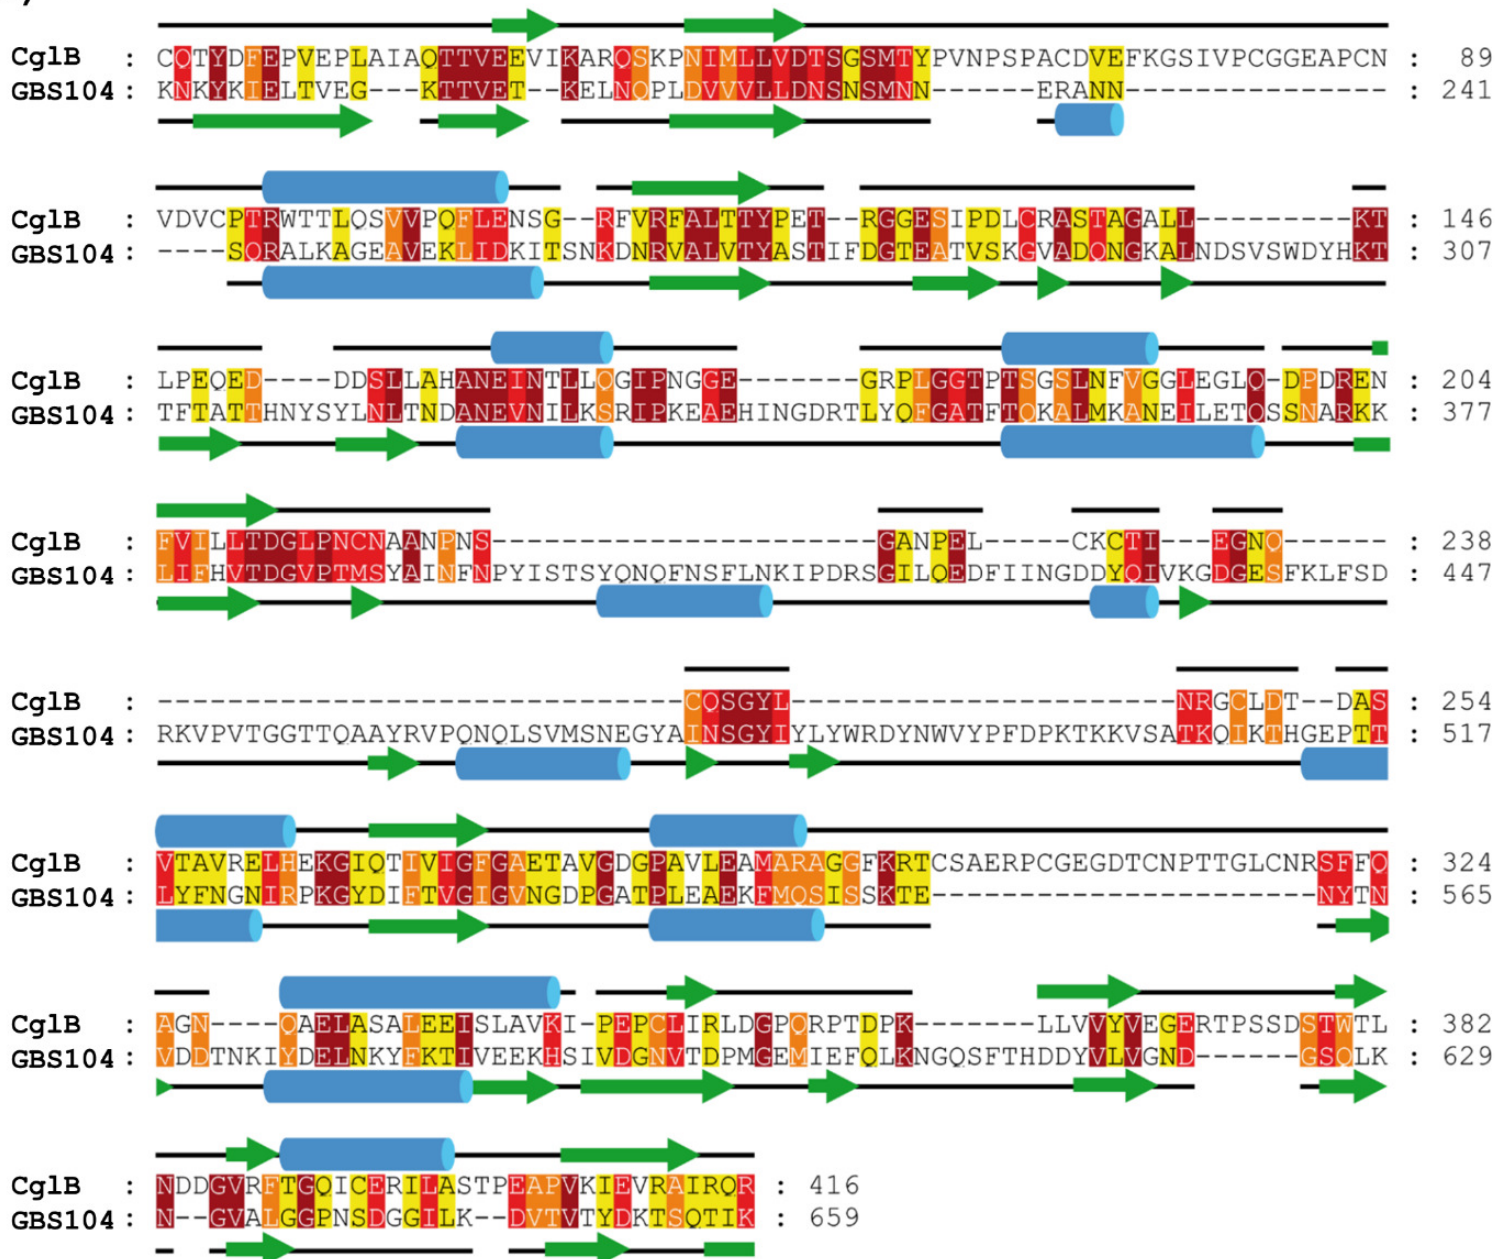

1201 **Supplementary Figure S2: Importance of CglB to Gliding Motility and Linked Behaviours**

1202 **A)** Single-cell gliding speeds for *M. xanthus* OM-module mutant strains (n = 100 cells) on hard  
1203 (1.5%) agar. The lower and upper boundaries of the boxes correspond to the 25th and 75th  
1204 percentiles, respectively. The median (line through centre of boxplot) and mean (+) of each  
1205 dataset are indicated. Lower and upper whiskers represent the 10<sup>th</sup> and 90<sup>th</sup> percentiles,  
1206 respectively; data points above and below the whiskers are drawn as individual points. Asterisks  
1207 denote datasets displaying statistically significant dataset differences ( $p < 0.0001$ ) relative to  
1208 WT, as determined via 1-way ANOVA with Tukey's multiple comparisons test.

1209 **B)** Ratio of number of Cys residues per gliding motility complex protein, divided by the total  
1210 number of amino acids in that protein.

1211 **C)** Single-cell gliding speeds for WT *M. xanthus* DZ2 (n = 700 cells) on hard (1.5%) agar  
1212 supplemented with increasing concentrations of DTT to reduce disulphide bonds of proteins in  
1213 contact with the substratum. The lower and upper boundaries of the boxes correspond to the  
1214 25th and 75th percentiles, respectively. The median (line through centre of boxplot) and mean  
1215 (+) of each dataset are indicated. Lower and upper whiskers represent the 10<sup>th</sup> and 90<sup>th</sup>  
1216 percentiles, respectively; data points above and below the whiskers are drawn as individual  
1217 points. Asterisks denote datasets displaying statistically significant dataset differences ( $p <$   
1218 0.0001) relative to 0 mM DTT treatment, as determined via 1-way ANOVA with Tukey's  
1219 multiple comparisons test.

1220 **D)** Polymertropism response for various *glt* and *agl* deletion mutant strains. Mean results are  
1221 displayed +/- SEM, with the number of biological replicates (*n*) used to analyze each strain as  
1222 follows: WT (20),  $\Delta cglB$  (16),  $\Delta gltK$  (19),  $\Delta gltB$  (11),  $\Delta gltA$  (15),  $\Delta gltC$  (15),  $\Delta gltJ$  (16),  $\Delta gltI$   
1223 (15),  $\Delta gltH$  (20)  $\Delta gltG$  (18),  $\Delta gltF$  (16),  $\Delta gltE$  (14),  $\Delta gltD$  (17),  $\Delta aglR$  (11),  $\Delta aglQ$  (6),  $\Delta aglS$   
1224 (5).

1225 **E)**  $\alpha$ -CglB Western immunoblot of CglB MIDAS motif amino acid substitution mutants from  
1226 whole-cell extracts. Non-adjacent lanes on the blot are separated by vertical black lines.

1227 **F)** Single-cell gliding speeds on hard (1.5%) agar for *M. xanthus* DZ2  $\Delta cglB$  (n = 120 cells)  
1228 complemented with CglB<sub>WT</sub> or CglB<sub>D56A</sub> ectopically expressed from the *attB* phage-attachment  
1229 site in the chromosome. The lower and upper boundaries of the boxes correspond to the 25th  
1230 and 75th percentiles, respectively. The median (line through centre of boxplot) and mean (+) of  
1231 each dataset are indicated. Lower and upper whiskers represent the 10<sup>th</sup> and 90<sup>th</sup> percentiles,

1232 respectively; data points above and below the whiskers are drawn as individual points. Asterisks  
1233 denote datasets displaying statistically significant dataset differences ( $p < 0.0001$ ) compared to  
1234 strains harbouring either the pSWU30 empty-vector control or the pCglB<sub>D56A</sub> VWA-domain  
1235 mutant CglB complementation construct, as determined via 1-way ANOVA with Tukey's  
1236 multiple comparisons test.

1237 **G)** Single-cell gliding speeds for *M. xanthus* DZ2  $\Omega pilA$  (n = 110 cells) on chitosan-coated glass  
1238 in a PDMS microfluidic chamber in the presence and absence of Ca<sup>2+</sup> ions. The lower and upper  
1239 boundaries of the boxes correspond to the 25th and 75th percentiles, respectively. The median  
1240 (line through centre of boxplot) and mean (+) of each dataset are indicated. Lower and upper  
1241 whiskers represent the 10<sup>th</sup> and 90<sup>th</sup> percentiles, respectively; data points above and below the  
1242 whiskers are drawn as individual points. Asterisk denotes datasets displaying statistically  
1243 significant differences ( $p < 0.0001$ , as determined via two-tailed Mann-Whitney test).



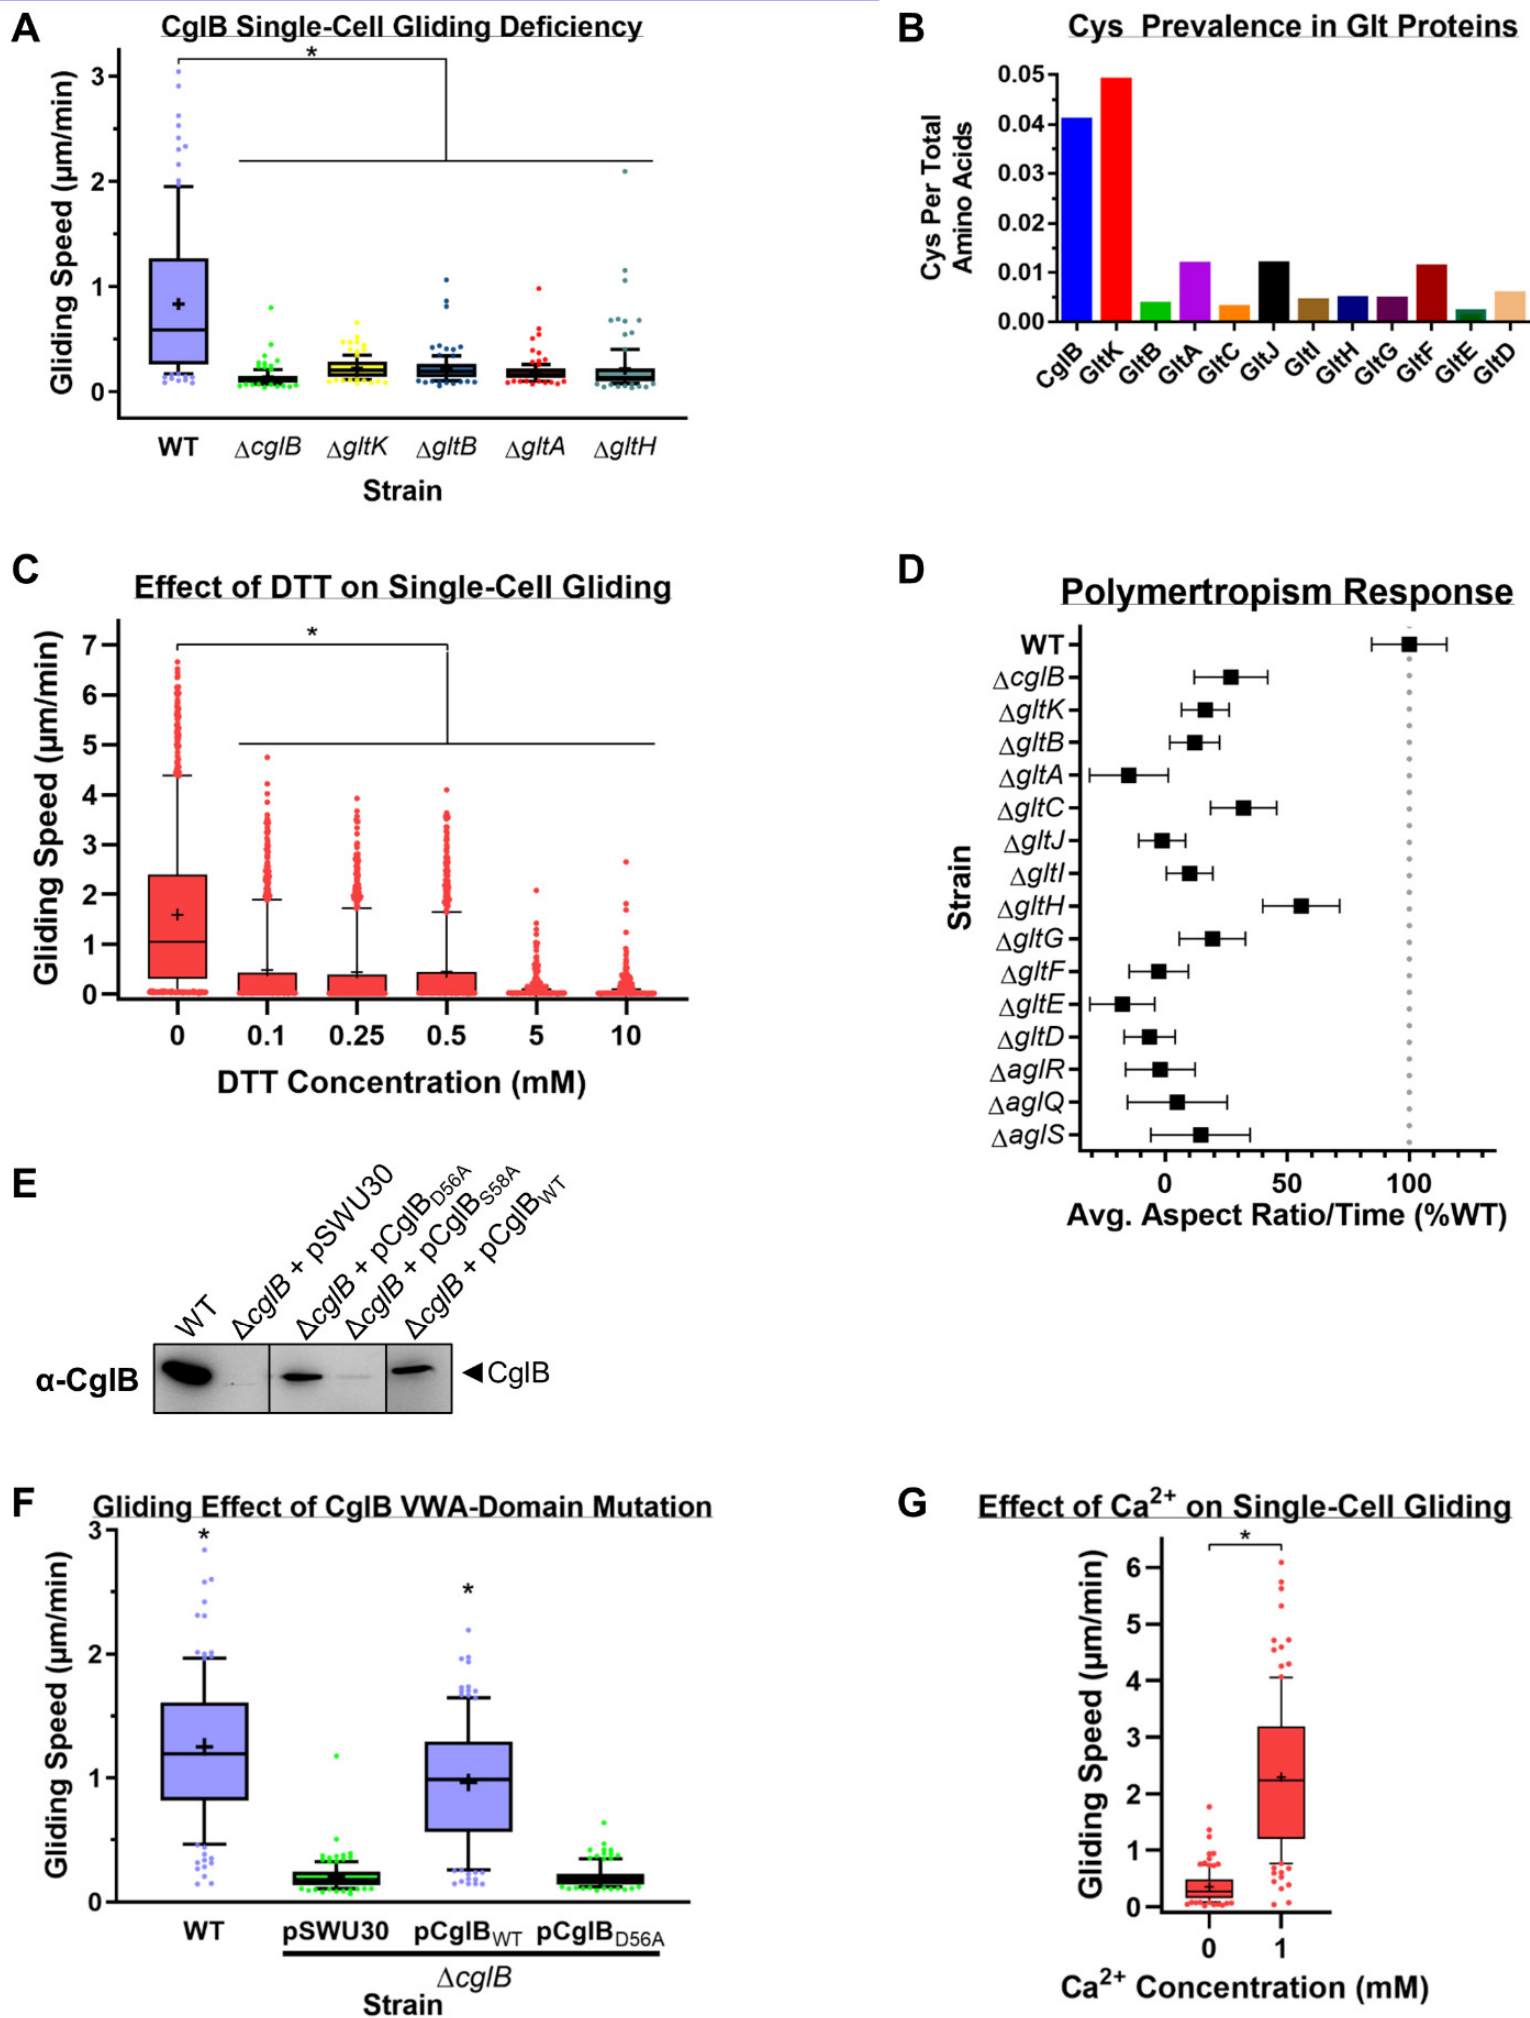



1245 **Supplementary Figure S3: CglB Co-Occurrence and Gene Synteny in Bacteria**

1246 Taxonomic distribution and co-occurrence of *agl* and *glt* genes in bacteria. Bootstrap values at  
1247 each node are indicated as follows: 100 (out of 100), ●; 90-99, ▲; 80-89, ■; 70-79, ◆; 60-69,  
1248 ●; 50-59, ★; < 49, ✕. Colour of gene hit indicates synteny with the G1 *gltDEFGHIJ* (*dark*  
1249 *blue*) or G2 *gltKBAC* (*blue*) gene clusters or lack thereof (*light blue*), respectively; herein,  
1250 synteny denotes a minimum of three genes in the vicinity of each other.

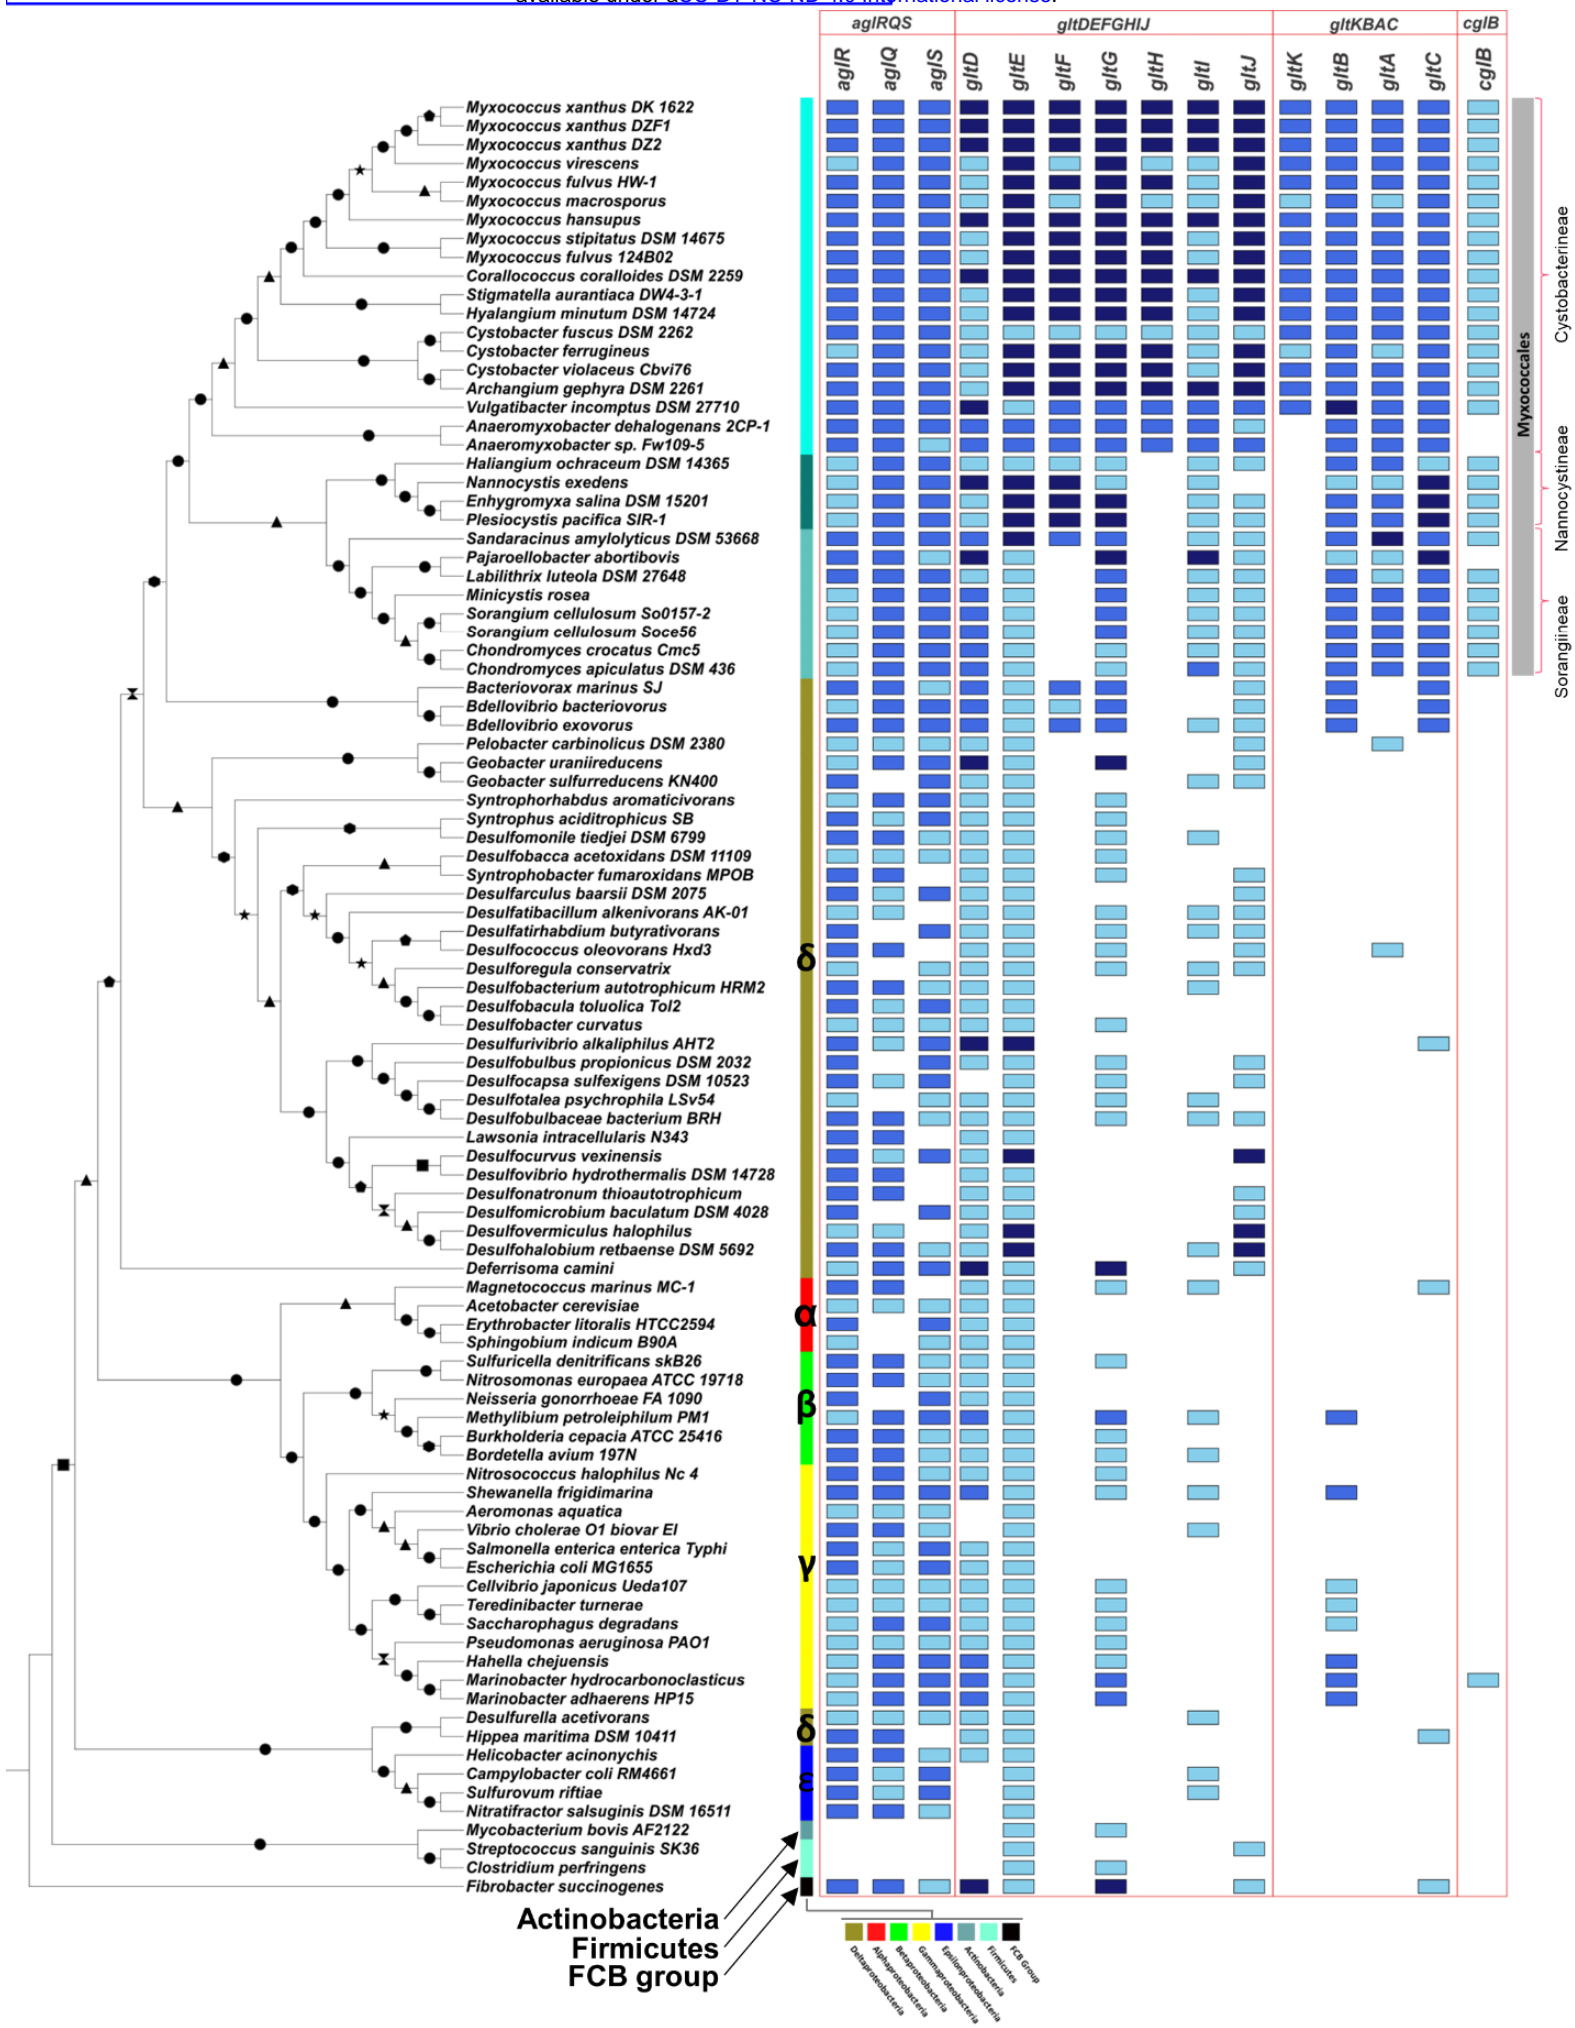

1252 **Supplementary Figure S4: Role of CglB in Agl–Glt Complex Localization and Directed**  
1253 **Surface Transport**

1254 **A)** In-gel fluorescence (i) scan and (ii) densitometry analysis of AglZ-YFP levels in WT vs.  
1255  $\Delta cglB$  crude-cell lysates resolved via SDS-PAGE. Fluorescence levels were analyzed across six  
1256 biological replicates and are displayed  $\pm$  SEM. Despite a higher mean value for AglZ-YFP  
1257 levels in  $\Delta cglB$  cells than in WT cells, this difference was not statistically significant, as  
1258 determined via Wilcoxon signed-rank test performed relative to “100” ( $p = 0.0938$ ).

1259 **B)** Montage of *M. xanthus* gliding time course displaying AglZ-YFP localization (white  
1260 arrowheads) on hard agar via epifluorescence microscopy. Images were acquired at 10 s  
1261 intervals. See also **Fig. 2C**.

1262 **C)** Kymograph of AglZ-YFP localization in *M. xanthus* cells on chitosan-coated PDMS  
1263 microfluidic chambers via TIRFM. Arrows in *orange* denote sequential kymograph slices over  
1264 time. Arrows in *cyan* indicate positions of trafficked Agl–Glt clusters in the cell. The manner  
1265 in which various fluorescent cluster tracking data were obtained have been indicated in the  
1266 example images. See also **Fig. 2E-H**.

1267 **D)** Representative time course of polystyrene bead position tracking along the length of a cell.

1268 **E)** Speed of Agl–Glt complex trafficking via TIRFM (of AglZ-YFP) on chitosan-coated glass  
1269 surfaces in PDMS microfluidic chambers for WT ( $n = 260$  clusters) and  $\Delta gltK$  ( $n = 371$  clusters)  
1270 strains. The distribution of the two datasets are significantly different, as calculated via  
1271 unpaired two-tailed Mann-Whitney U-test ( $p < 0.05$ ). See also **Fig. 2F** and **Supplementary Fig.**  
1272 **S4C**.

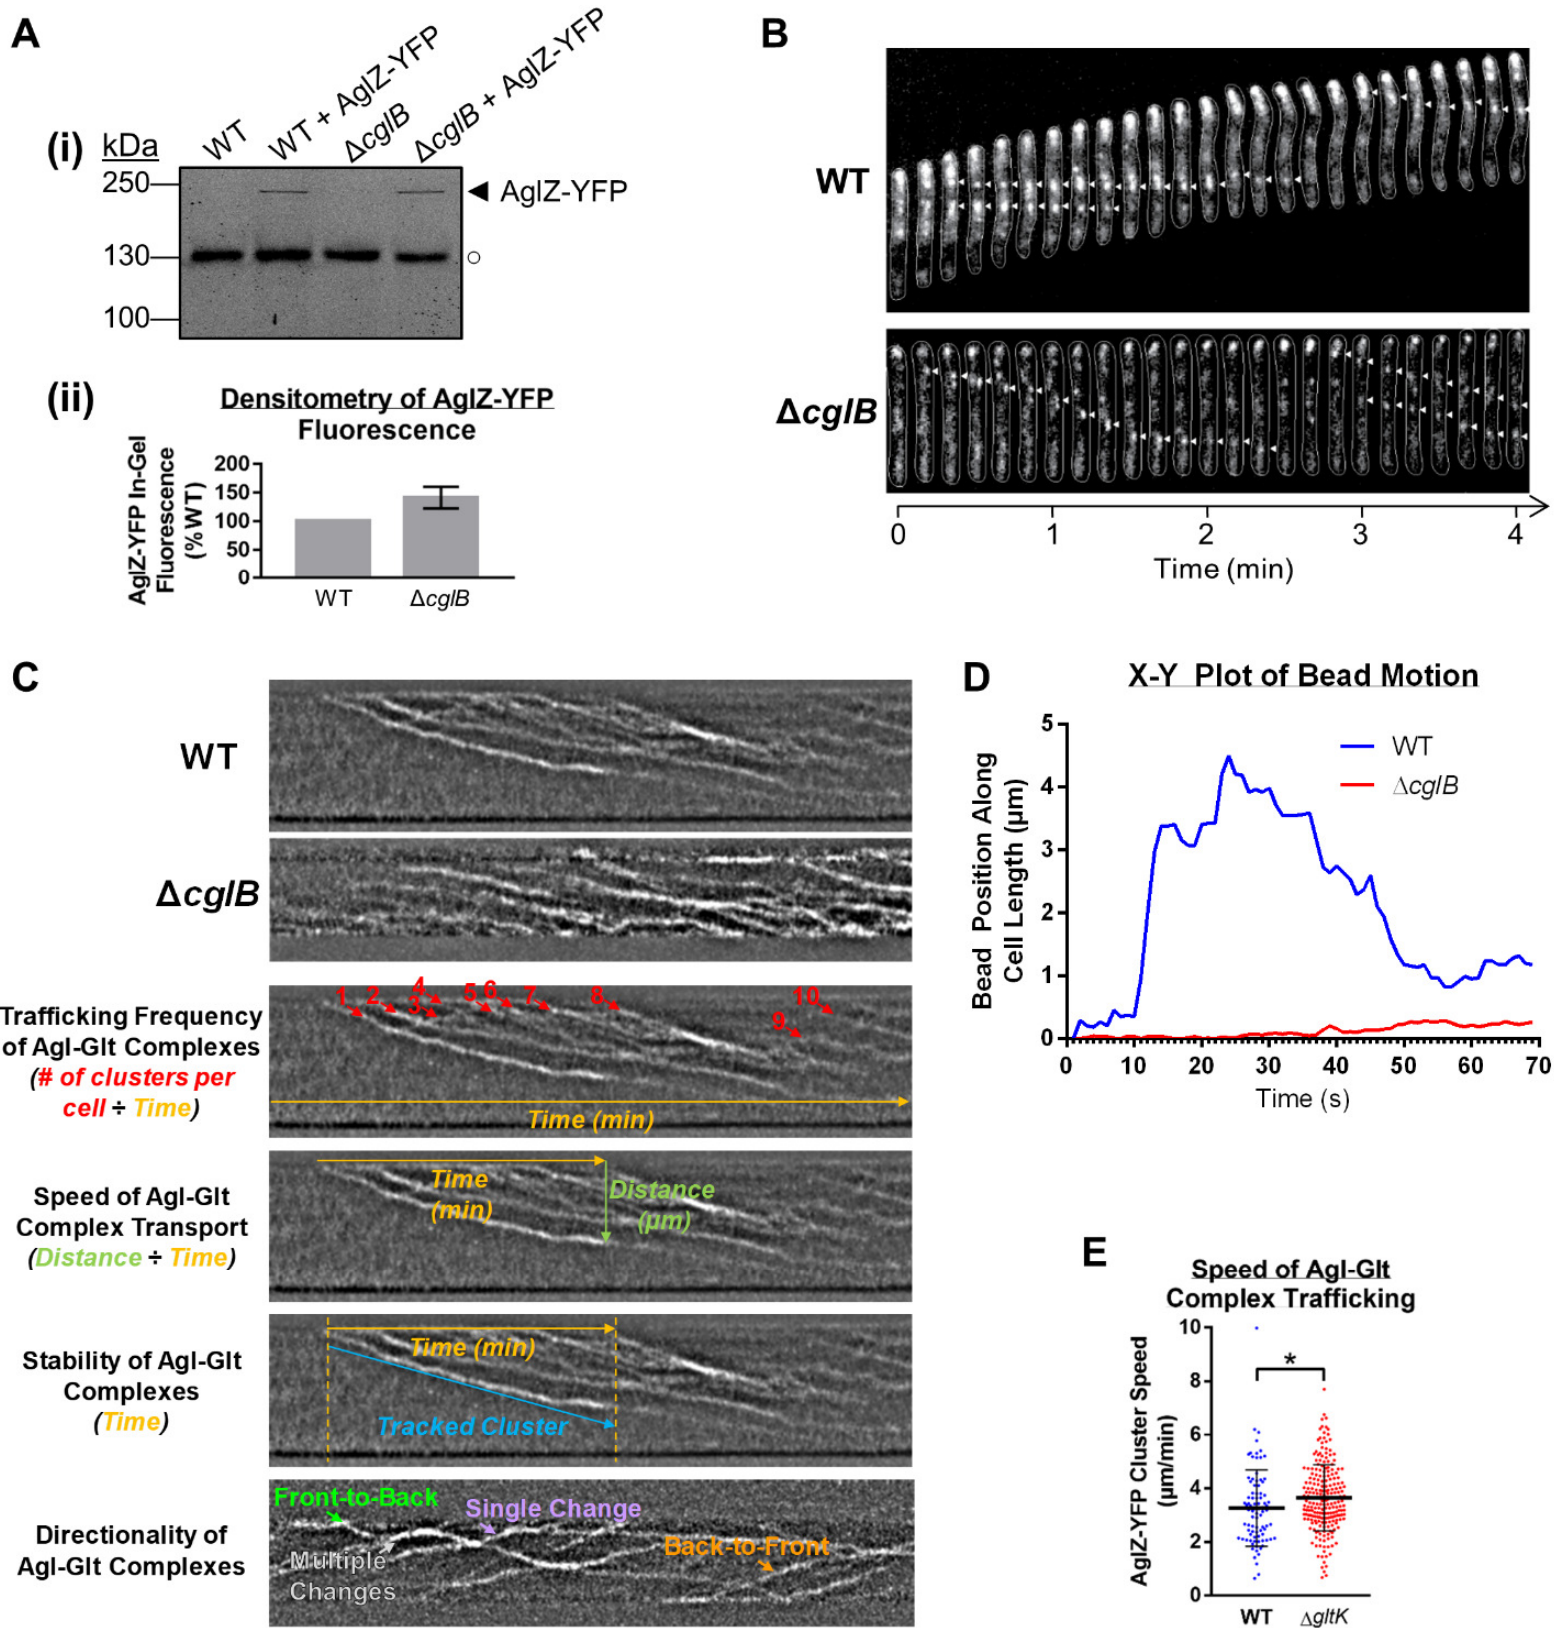

1274 **Supplementary Figure S5: Possibility of Post-Translational Processing of CglB**

1275 **A)** Protein samples from WT cells resuspended in TPM buffer and digested with exogenous  
1276 Proteinase K. Aliquots of the digestion mixture were removed at 15-min intervals and TCA-  
1277 precipitated to stop digestion. The higher, darker zone on the blot corresponds to a section of the  
1278 same blot image for which the contrast has been increased to highlight lower-intensity protein  
1279 bands. Legend: ◀, full-length CglB; ○, loading control (non-specific protein band labelled by  $\alpha$ -  
1280 CglB pAb).

1281 **B)** Concentrated supernatant samples from  $\Delta$ *gltB* mutants that exhibit depleted levels of cell-  
1282 associated CglB. Equivalent supernatant volumes from different strains were concentrated in a  
1283 centrifuge using 3 kDa-cutoff protein concentrator columns, followed by TCA treatment of  
1284 precipitate proteins. Legend: ◀, full-length CglB. See also **Fig. 3B**.

1285 **C)** Peptides identified via trypsin/V8 digestion and mass spectrometric analysis of  
1286 immunoprecipitated CglB from  $\Delta$ *gltB* culture supernatant. Legend: *grey*, predicted signal  
1287 peptide; *green*, trypsin-derived peptide; *cyan*, V8-derived peptide; *red box*, N-terminal tract of  
1288 CglB unaccounted for by mass spectrometry.

1289 **D)**  $\alpha$ -CglB Western immunoblot demonstrating the resumption of CglB release from EDTA-  
1290 grown cells upon transfer to an EDTA-free minimal buffer (TPM) or rich medium (CYE).  
1291 Legend: ◀, full-length CglB; ←, CglB degradation band; P<sub>EDTA</sub>, parent strain (WT or  $\Delta$ *gltB*)  
1292 grown in the presence of EDTA. See also **Fig. 3E**.



### A CgIB Intrinsic Proteinase K Insensitivity

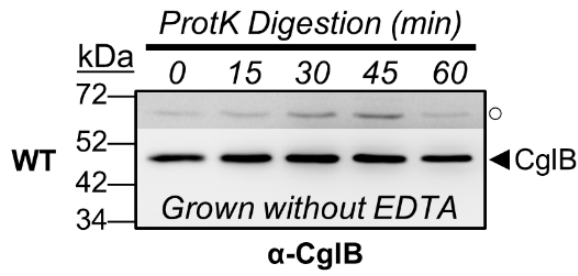

### B Spin Column-Concentrated Culture Supernatants

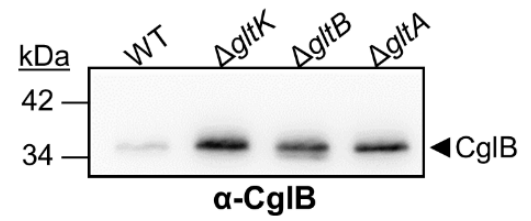

### C

>CgIB

MRSKLPILLSALSVGAVVLA CQTYDFEPVEPLAIAQTTFVEEVIKARQSKPNIMLLVDTSGSMITYPVNPSACDVEFKGSIVPCGGEAPCNVDVCPTRWTTLQSVVPQFLENSGRF

VRFALTTYPETRGGESIPDLICRASTAGALLKTLPEQEDDSSLAHANEINTLLQGIPNGGEGRPLGGTPTSGSINLVGGLEGLQDPDRENFVILLTDGLPNCNAANPNSGANPE

LCKCTIEGNQCQSGYLNRCGLDITASVTAVRELHEKGIQTIVIGFGAETA VGDGPAVLEAMARAGGFKRTCSAERPCEGEGDTCNPTTGLCNRSFFQAGNQAE LASALEEISLAV

KIPEPCLIRLDGPQRP TDPKLLVVYVEGERTPSSDSTWTLNDDGVRFTGQICERILASTPEAPVKIEVRAIRQR

### D

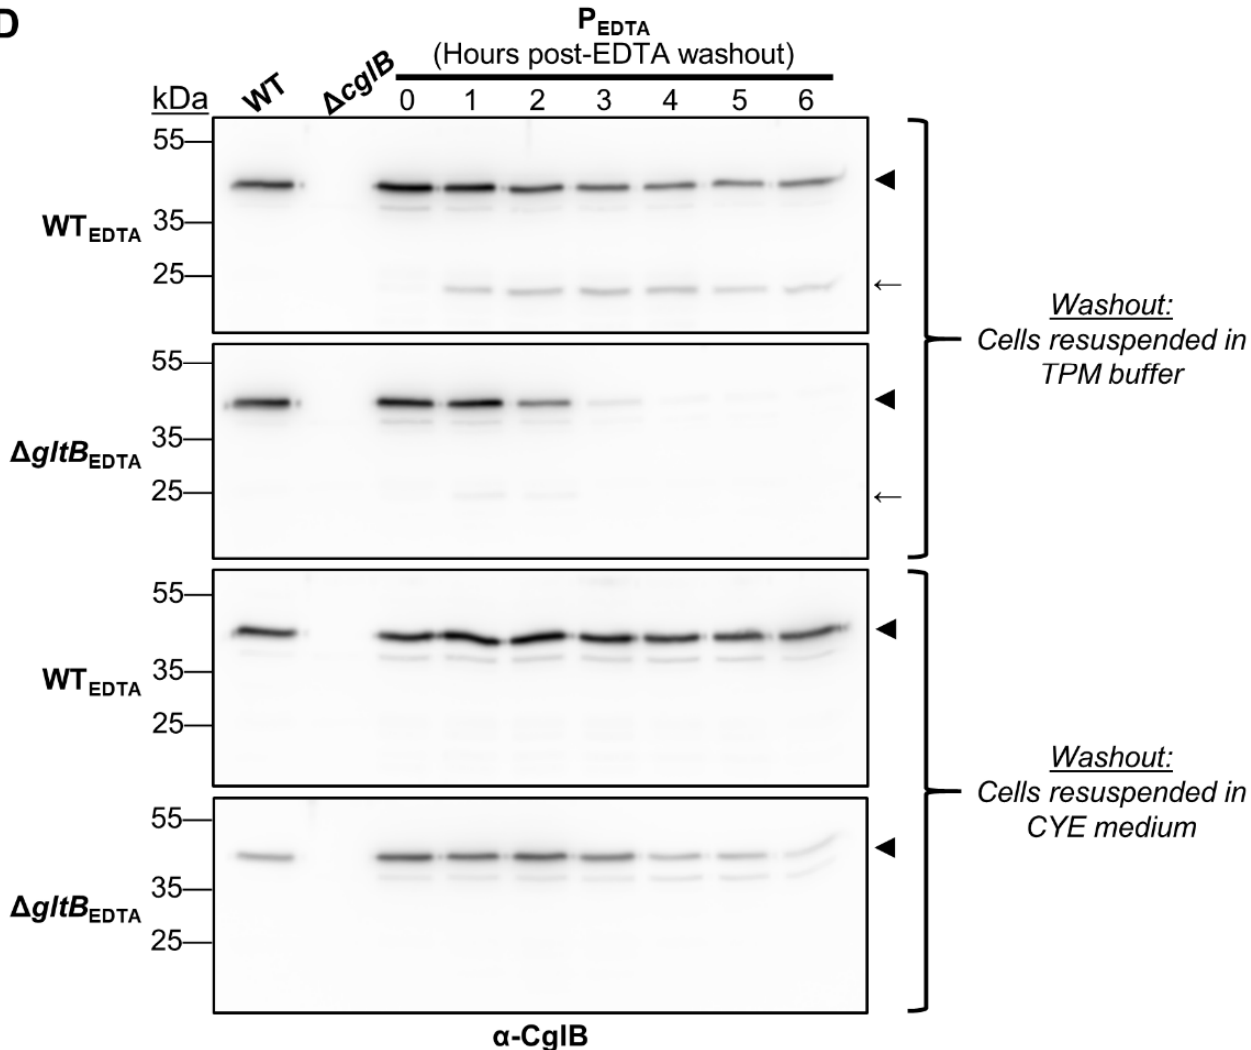



1294 **Supplementary Figure S6: Exploration of GltK Function**

1295 Motility restoration in cells following *trans*-complementation via OME. Bottom panels (scale  
1296 bar: 20  $\mu$ m) are magnified views of the corresponding upper panels (scale bar: 1 mm).

# SUPPLEMENTARY FIGURE S6

bioRxiv preprint doi: <https://doi.org/10.1101/2020.07.22.316333>; this version posted July 22, 2020. The copyright holder for this preprint (which was not certified by peer review) is the author/funder, who has granted bioRxiv a license to display the preprint in perpetuity. It is made available under aCC-BY-NC-ND 4.0 International license.

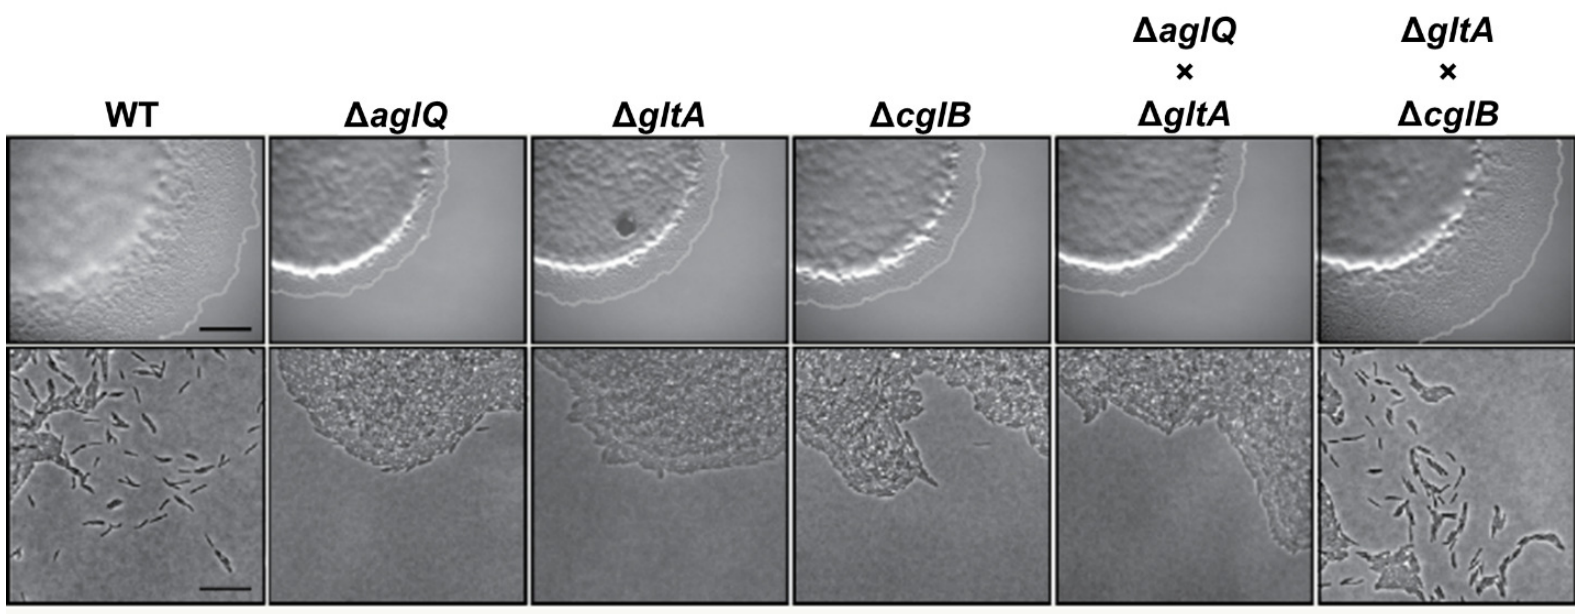

1298 **Supplementary Table S1: Strains of *M. xanthus* Used in this Study**

1299 *Myxococcus xanthus* strains used in this study.

## SUPPLEMENTARY TABLE S1

### Supplementary Table S1: *Myxococcus xanthus* strains used in this study

| <u>Strain</u> | <u>Genotype/Description</u>                                 | <u>Construction</u>                                                             | <u>Source or Reference</u> |
|---------------|-------------------------------------------------------------|---------------------------------------------------------------------------------|----------------------------|
| DZ2           | WT                                                          | Wild type                                                                       | Laboratory collection      |
| TM770         | $\Omega$ <i>cglB</i>                                        | DZ2 $\Omega$ <i>cglB</i>                                                        | This work                  |
| TM913         | $\Delta$ <i>cglB</i>                                        | DZ2 $\Delta$ <i>cglB</i>                                                        | This work                  |
| TM600         | $\Delta$ <i>gltK</i>                                        | DZ2 $\Delta$ <i>gltK</i> (pBJ $\Delta$ <i>gltK</i> )                            | Luciano et al., 2011       |
| TM603         | $\Delta$ <i>gltB</i>                                        | DZ2 $\Delta$ <i>gltB</i> (pBJ $\Delta$ <i>gltB</i> )                            | Luciano et al., 2011       |
| TM606         | $\Delta$ <i>gltA</i>                                        | DZ2 $\Delta$ <i>gltA</i> (pBJ $\Delta$ <i>gltA</i> )                            | Luciano et al., 2011       |
| TM570         | $\Delta$ <i>gltC</i>                                        | DZ2 $\Delta$ <i>gltC</i> (pBJ $\Delta$ <i>gltC</i> )                            | Luciano et al., 2011       |
| TM646         | $\Delta$ <i>gltJ</i>                                        | DZ2 $\Delta$ <i>gltJ</i>                                                        | This work                  |
| TM731         | $\Delta$ <i>gltI</i>                                        | DZ2 $\Delta$ <i>gltI</i>                                                        | This work                  |
| TM149         | $\Delta$ <i>gltH</i>                                        | DZ2 $\Delta$ <i>gltH</i> (pBJ $\Delta$ <i>gltH</i> )                            | Luciano et al., 2011       |
| TM135         | $\Delta$ <i>gltG</i>                                        | DZ2 $\Delta$ <i>gltG</i> (pBJ $\Delta$ <i>gltG</i> )                            | Luciano et al., 2011       |
| TM136         | $\Delta$ <i>gltF</i>                                        | DZ2 $\Delta$ <i>gltF</i> (pBJ $\Delta$ <i>gltF</i> )                            | Luciano et al., 2011       |
| TM148         | $\Delta$ <i>gltE</i>                                        | DZ2 $\Delta$ <i>gltE</i> (pBJ $\Delta$ <i>gltE</i> )                            | Luciano et al., 2011       |
| TM142         | $\Delta$ <i>gltD</i>                                        | DZ2 $\Delta$ <i>gltD</i> (pBJ $\Delta$ <i>gltD</i> )                            | Luciano et al., 2011       |
| TM1157        | $\Delta$ <i>gltK</i> $\Delta$ <i>gltH</i>                   | TM149 $\Delta$ <i>gltK</i> (pBJ $\Delta$ <i>gltK</i> )                          | This work                  |
| TM1156        | $\Delta$ <i>gltB</i> $\Delta$ <i>gltH</i>                   | TM149 $\Delta$ <i>gltB</i> (pBJ $\Delta$ <i>gltB</i> )                          | This work                  |
| TM1158        | $\Delta$ <i>gltA</i> $\Delta$ <i>gltH</i>                   | TM149 $\Delta$ <i>gltA</i> (pBJ $\Delta$ <i>gltA</i> )                          | This work                  |
| TM1154        | $\Delta$ <i>gltB</i> $\Delta$ <i>gltA</i>                   | DZ2 pBJ114- $\Delta$ <i>gltBA</i>                                               | This work                  |
| TM829         | WT + <i>aglZ-YFP</i>                                        | DZ2 pBJ <i>AgIZ-YFP</i>                                                         | Mignot et al., 2007        |
| TM1181        | $\Delta$ <i>cglB</i> + <i>aglZ-YFP</i>                      | TM913 <i>aglZ-YFP</i> (pBJ <i>AgIZ-YFP</i> )                                    | This work                  |
| TM1159        | $\Delta$ <i>cglB</i> + <i>cglB</i> <sub>WT</sub>            | TM913 <i>cglB</i> <sub>WT</sub> (pC <i>gIB</i> <sub>WT</sub> )                  | This work                  |
| TM1149        | $\Delta$ <i>cglB</i> + <i>cglB</i> <sub>D56A</sub>          | TM913 <i>cglB</i> <sub>D56A</sub> (pC <i>gIB</i> <sub>D56A</sub> )              | This work                  |
| TM1153        | $\Delta$ <i>cglB</i> + <i>cglB</i> <sub>S58A</sub>          | TM913 <i>cglB</i> <sub>S58A</sub> (pC <i>gIB</i> <sub>S58A</sub> )              | This work                  |
| TM1290        | $\Delta$ <i>cglB</i> + IMss-mCherry                         | TM913 IMss-mCherry<br>(pSWU10-PpilA-IMss-mCherry)                               | This work                  |
| TM1365        | $\Delta$ <i>aglQ</i> $\Delta$ <i>gltK</i>                   | TM146 $\Delta$ <i>aglQ</i> (pBJ $\Delta$ <i>gltK</i> )                          | This work                  |
| TM1367        | $\Delta$ <i>cglB</i> $\Delta$ <i>gltK</i>                   | TM913 $\Delta$ <i>cglB</i> (pBJ $\Delta$ <i>gltK</i> )                          | This work                  |
| TM1380        | $\Delta$ <i>cglB</i> $\Delta$ <i>gltK</i><br>+ IMss-mCherry | TM1367 $\Delta$ <i>cglB</i> $\Delta$ <i>gltK</i><br>(pSWU10-PpilA-IMss-mCherry) | This work                  |

1301 **Supplementary Table S2: Fold-Recognition Hits of CglB to Various VWA-Containing**  
1302 **Proteins**

1303 Select fold-recognition hits of structural homologues in the PDB to CglB, as identified via  
1304 HHpred. The strength of the hits is anchored by the strong detection of a von Willebrand Factor  
1305 type A domain.

## SUPPLEMENTARY TABLE S2

### Supplementary Table S2: HHpred fold-recognition hits in the PDB to CgIB

| <u>PDB Hit</u> | <u>Name</u>                                                                 | <u>Probability</u> | <u>E-value</u> | <u>Score</u> | <u>Aligned Coils</u> | <u>Identities</u> | <u>Similarity</u> |
|----------------|-----------------------------------------------------------------------------|--------------------|----------------|--------------|----------------------|-------------------|-------------------|
| 1MF7_A         | Integrin $\alpha$ M<br>( <i>Homo sapiens</i> )                              | 99.4               | 6.4E-14        | 123.84       | 187                  | 19%               | 0.191             |
| 4FX5_A         | von Willebrand<br>factory type A<br>( <i>Catenulispora<br/>acidiphila</i> ) | 99.36              | 3e-13          | 140.21       | 199                  | 19%               | 0.161             |
| 4OKR_A         | Micronemal<br>protein MIC2<br>( <i>Toxoplasma<br/>gondii</i> )              | 99.34              | 3.8E-13        | 127.97       | 180                  | 20%               | 0.242             |
| 4F1J_B         | TRAP<br>( <i>Plasmodium<br/>falciparum</i> )                                | 99.18              | 1.1E-11        | 110.16       | 178                  | 17%               | 0.257             |
| 3TXA_A         | GBS104 tip pilin<br>( <i>Streptococcus<br/>agalactiae</i><br>serogroup V)   | 99.13              | 7.2E-12        | 136.34       | 188                  | 17%               | 0.239             |
